# Supplementary material for: MiR-139-5p as a novel serum biomarker for recurrence and metastasis in colorectal cancer
Source: PubMed Central journal article supplement (PMC5338356; doi:10.1038/srep43393), 2017-03-06
Supplement: srep43393-s1.pdf [file srep43393-s1.pdf]

## **MiR-139-5p as a novel serum and tissue biomarker for recurrence and metastasis of colorectal cancer.**

Jinsei Miyoshi<sup>1,2</sup>, Shusuke Toden<sup>1</sup>, Kazuhiro Yoshida<sup>1,3</sup>, Yuji Toiyama<sup>4</sup>, Steven R Alberts<sup>5</sup>, , Masato Kusunoki<sup>4</sup>, Frank A. Sinicrope<sup>5</sup> and Ajay Goel<sup>1</sup>

<sup>1</sup> Center for Gastrointestinal Research; Center for Translational Genomics and Oncology, Baylor Scott & White Research Institute and Sammons Cancer Center, Baylor University Medical Center, Dallas, Texas, USA.

<sup>2</sup> Department of Gastroenterology and Oncology, Institutes of Biomedical Sciences, Tokushima University Graduate School, Tokushima, Japan.

<sup>3</sup> Department of Gastroenterological Surgery, Okayama University Graduate School of Medicine, Dentistry and Pharmaceutical Sciences, Okayama, Japan.

<sup>4</sup> Department of Gastrointestinal and Pediatric Surgery, Division of Reparative Medicine, Institute of Life Sciences, Graduate School of Medicine, Mie University, Mie, Japan.

<sup>5</sup> Division of Medical Oncology, Mayo Clinic and Mayo Cancer Center, Rochester, Minnesota, USA.

## SUPPLEMENTAL TABLES

**Supplemental Table 1:** Characteristics of Mayo Clinic cohort.

| <b>Clinical characteristic of patients</b> |                    | <b>N (%)</b> |
|--------------------------------------------|--------------------|--------------|
| Age                                        | Median age (range) | 59 (25-81)   |
| Gender, n (%)                              | Female             | 46 (47.4)    |
|                                            | Male               | 51 (52.6)    |
| Location, n (%)                            | Right side         | 49 (50.5)    |
|                                            | Left side          | 48 (49.5)    |
| TNM Stage, n (%)                           | I                  | 0 (0)        |
|                                            | II                 | 0 (0)        |
|                                            | III                | 97 (100)     |
|                                            | IV                 | 0 (0)        |
| Grade, n (%)                               | Low (grade 1-2)    | 68 (70.1)    |
|                                            | High (grade 3-4)   | 29 (29.9)    |
| MMR status, n (%)                          | Deficient          | 10 (10.3)    |
|                                            | Proficient         | 87 (89.7)    |

Abbreviations: Right side; cecum, ascending and transvers colon, Left side; descending and sigmoid colon and rectum, TMN; tumor, node, metastasis, MMR: mismatch repair.

**Supplemental Table 2: Characteristics of TCGA cohort.**

| <b>Clinical characteristic of patients</b> |                    | <b>N</b> | <b>(%)</b> |
|--------------------------------------------|--------------------|----------|------------|
| Age                                        | Median age (range) | 65       | (37-90)    |
| Gender                                     | Female             | 72       | (48.9)     |
|                                            | Male               | 75       | (51.0)     |
| Location                                   | Colon              | 100      | (68.0)     |
|                                            | Rectum             | 46       | (31.2)     |
| TNM Stage                                  | I                  | 0        | (0)        |
|                                            | II                 | 42       | (28.5)     |
|                                            | III                | 105      | (71.4)     |
|                                            | IV                 | 0        | (0)        |
| Tumor stage                                | T1 and T2          | 8        | (7.61)     |
|                                            | T3 and T4          | 139      | (92.3)     |
| Mucinous                                   | Yes                | 19       | (12.9)     |
|                                            | No                 | 128      | (87.0)     |

Abbreviations: TMN: tumor, node, metastasis.

**Supplemental Table 3:** Clinicopathological variables and miR-139-5p expression in Cohort 1.

| Variables            |                  | N   | miR-139-5p expression |               | p value |
|----------------------|------------------|-----|-----------------------|---------------|---------|
|                      |                  |     | Hi<br>(N=51)          | Low<br>(N=60) |         |
| Age (y)              | >67 (median)     | 54  | 25                    | 29            | 0.942   |
|                      | ≤67              | 57  | 26                    | 31            |         |
| Sex                  | Female           | 43  | 23                    | 20            | 0.206   |
|                      | Male             | 68  | 28                    | 40            |         |
| Cancer type          | Rectum           | 46  | 23                    | 23            | 0.472   |
|                      | Colon            | 65  | 28                    | 37            |         |
| Histological type    | Undifferentiated | 10  | 5                     | 5             | 0.788   |
|                      | Differentiated   | 101 | 46                    | 55            |         |
| Pathological T stage | T3/T4            | 81  | 47                    | 34            | <0.001* |
|                      | T1/T2            | 30  | 4                     | 26            |         |
| Venous invasion      | +                | 48  | 25                    | 23            | 0.259   |
|                      | -                | 63  | 26                    | 37            |         |
| Lymphatic invasion   | +                | 90  | 40                    | 50            | 0.513   |
|                      | -                | 21  | 11                    | 10            |         |
| TNM Stage            | III              | 51  | 27                    | 24            | 0.174   |
|                      | II               | 60  | 24                    | 36            |         |

\* p &lt; 0.05

**Supplemental Table 4:** Clinicopathological variables and miR-139-5p expression in Cohort 2.

| Variables            |                  | N   | miR-139-5p expression |                | p value |
|----------------------|------------------|-----|-----------------------|----------------|---------|
|                      |                  |     | Hi<br>(N=29)          | Low<br>(N=110) |         |
| Age (y)              | >66 (median)     | 65  | 12                    | 53             | 0.515   |
|                      | ≤66              | 74  | 17                    | 57             |         |
| Sex                  | Female           | 56  | 9                     | 47             | 0.407   |
|                      | Male             | 83  | 20                    | 63             |         |
| Cancer type          | Rectum           | 57  | 17                    | 40             | 0.030*  |
|                      | Colon            | 82  | 12                    | 70             |         |
| Histological type    | Undifferentiated | 36  | 5                     | 31             | 0.233   |
|                      | Differentiated   | 103 | 24                    | 79             |         |
| Pathological T stage | T3/T4            | 112 | 29                    | 83             | 0.003*  |
|                      | T1/T2            | 27  | 0                     | 27             |         |
| Venous invasion      | +                | 101 | 19                    | 82             | 0.763   |
|                      | -                | 33  | 7                     | 26             |         |
| Lymphatic invasion   | +                | 130 | 25                    | 105            | 0.072   |
|                      | -                | 9   | 4                     | 5              |         |
| TNM Stage            | III              | 60  | 13                    | 47             | 0.800   |
|                      | I/II             | 79  | 16                    | 63             |         |

\* p &lt;0.05

**Supplemental Table 5:** Clinicopathological variables and miR-139-5p expression in Cohort 3.

| Variables            |                  | miR-139-5p expression |              |               | p value |
|----------------------|------------------|-----------------------|--------------|---------------|---------|
|                      |                  | N                     | Hi<br>(N=15) | Low<br>(N=26) |         |
| Age (y)              | >67 (median)     | 20                    | 8            | 12            | 0.661   |
|                      | ≤67              | 21                    | 7            | 14            |         |
| Sex                  | Female           | 17                    | 7            | 10            | 0.611   |
|                      | Male             | 24                    | 8            | 16            |         |
| Cancer type          | Rectum           | 15                    | 6            | 9             | 0.733   |
|                      | Colon            | 26                    | 9            | 17            |         |
| Histological type    | Undifferentiated | 5                     | 1            | 4             | 0.417   |
|                      | Differentiated   | 36                    | 14           | 22            |         |
| Pathological T stage | T3/T4            | 27                    | 12           | 15            | 0.151   |
|                      | T1/T2            | 14                    | 3            | 11            |         |
| Venous invasion      | +                | 16                    | 9            | 7             | 0.038*  |
|                      | -                | 25                    | 6            | 19            |         |
| Lymphatic invasion   | +                | 31                    | 13           | 18            | 0.216   |
|                      | -                | 10                    | 2            | 8             |         |
| TNM Stage            | III              | 18                    | 10           | 8             | 0.027*  |
|                      | I/II             | 23                    | 5            | 18            |         |

\* p &lt; 0.05

**Supplemental Table 6:** Primer for RT-PCR amplification.

|                 |                               |
|-----------------|-------------------------------|
| ZEB1-RT-F       | 5'-GATGATGAATGCGAGTCAGATGC-3' |
| ZEB1-RT-R       | 5'-ACAGCAGTGTCTTGTGTTGT-3'    |
| ZEB2-RT-F       | 5'-GGAGACGAGTCCAGCTAGTGT-3'   |
| ZEB2-RT-R       | 5'-CCACTCCACCCTCCCTTATTTTC-3' |
| E-Cadherin-RT-F | 5'-ATTTTCCCTCGACACCCGAT-3'    |
| E-Cadherin-RT-R | 5'-TCCCAGGCGTAGACCAAGA-3'     |
| GAPDH-RT-F      | 5'-CTGCACCACCAACTGCTTAG-3'    |
| GAPDH-RT-R      | 5'-GTCTTCTGGGTGGCAGTGAT-3'    |

**SUPPLEMENTAL DATA**

**Supplemental Data 1:** Summary statistics from analyses comparing recurrence CRC patients (n=50) to non-recurrence CRC patients (n=47) in the Mayo clinic cohort.

## SUPPLEMENTAL FIGURE LEGENDS

**Supplemental Figure 1:** MiR-139-5p expression in primary CRC with subsequent liver metastasis, lung metastasis and other metastasis. Recurrence sites in cohort 1: liver metastasis n=11, lung metastasis n=12, other metastasis n=8.

**Supplemental Figure 2:** MiR-139-5p expression levels between microsatellite stable (MSS) and microsatellite instable (MSI) tumors in stage III CRC. Microsatellite instability (MSI) status: MSS n=84, MSI n=20.

**Supplemental Figure 3:** *The expression levels of miR-139-5p in CRC cell lines.* 7 CRC cell lines: SW480, SW620, Caco-2, LoVo, RKO, HCT-116, HT-29.



Supplemental Figure 1

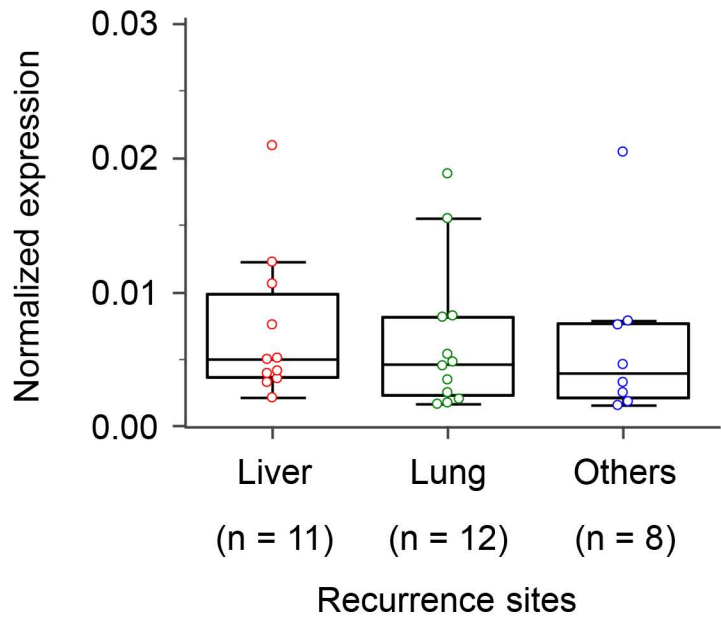

Supplemental Figure 2

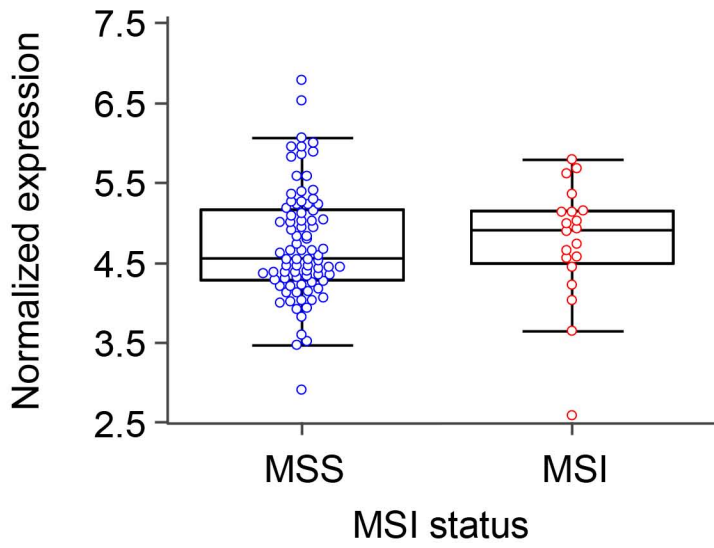

Supplemental Figure 3

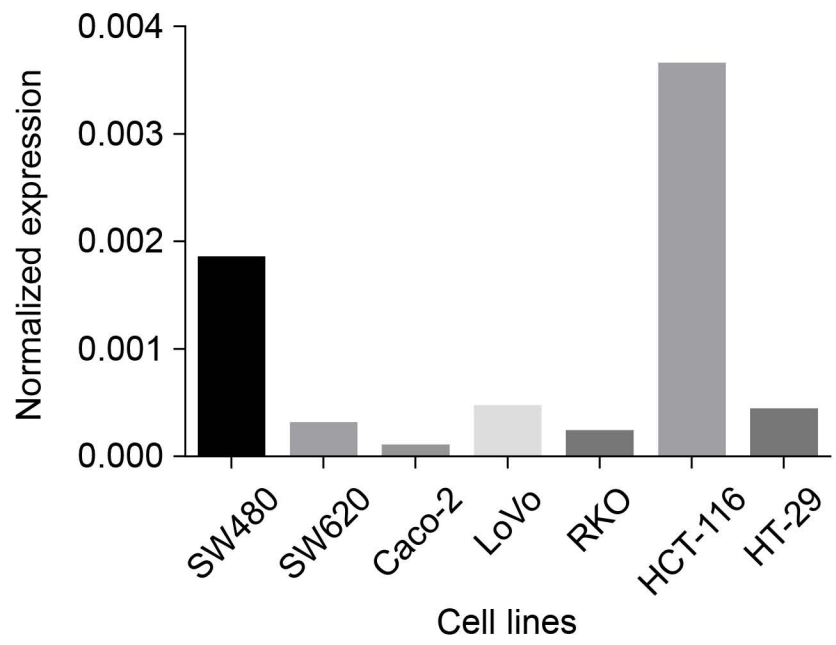

**Supplemental Data 1. Summary statistics from analyses comparing recurrence CRC patients (n=50) to non-recurrence CRC patients (n=47) in the Mayo clinic cohort**

| miRNA ID               | log2FC | p-value  | q-value | Mean in<br>recurrences | Mean in non-<br>recurrences | Overall Mean | Overall SD |
|------------------------|--------|----------|---------|------------------------|-----------------------------|--------------|------------|
| hp_hsa-mir-518e_x_st   | -0.090 | 3.22E-05 | 0.050   | 5.57                   | 5.66                        | 5.61         | 0.112      |
| hsa-miR-320e_st        | 0.350  | 4.48E-05 | 0.050   | 8.07                   | 7.72                        | 7.90         | 0.440      |
| hp_hsa-mir-125a_st     | 0.081  | 4.25E-04 | 0.315   | 5.88                   | 5.80                        | 5.84         | 0.116      |
| hsa-miR-433_st         | 0.148  | 7.22E-04 | 0.380   | 5.70                   | 5.56                        | 5.63         | 0.221      |
| hp_hsa-mir-487b_x_st   | 0.072  | 9.46E-04 | 0.380   | 5.66                   | 5.58                        | 5.62         | 0.110      |
| hp_hsa-mir-497_st      | 0.083  | 1.11E-03 | 0.380   | 5.88                   | 5.80                        | 5.84         | 0.129      |
| hsa-miR-382_st         | 0.301  | 1.32E-03 | 0.380   | 7.01                   | 6.71                        | 6.87         | 0.473      |
| hsa-miR-1306_st        | 0.046  | 1.65E-03 | 0.380   | 5.45                   | 5.40                        | 5.43         | 0.073      |
| hp_hsa-mir-30a_st      | 0.035  | 2.08E-03 | 0.380   | 5.41                   | 5.37                        | 5.39         | 0.057      |
| hsa-miR-487b_st        | 0.247  | 2.29E-03 | 0.380   | 6.60                   | 6.36                        | 6.48         | 0.408      |
| hsa-miR-181c_st        | 0.210  | 2.38E-03 | 0.380   | 6.19                   | 5.98                        | 6.08         | 0.348      |
| hsa-miR-152_st         | 0.335  | 2.48E-03 | 0.380   | 8.14                   | 7.81                        | 7.98         | 0.558      |
| hp_hsa-mir-432_st      | 0.039  | 2.66E-03 | 0.380   | 5.52                   | 5.48                        | 5.50         | 0.065      |
| hp_hsa-mir-376c_x_st   | 0.040  | 2.86E-03 | 0.380   | 5.41                   | 5.37                        | 5.39         | 0.067      |
| hp_hsa-mir-4273_st     | 0.031  | 2.90E-03 | 0.380   | 5.35                   | 5.32                        | 5.33         | 0.052      |
| hsa-miR-4283_st        | 0.041  | 2.93E-03 | 0.380   | 5.46                   | 5.42                        | 5.44         | 0.069      |
| hsa-miR-345_st         | -0.284 | 3.02E-03 | 0.380   | 7.51                   | 7.79                        | 7.64         | 0.483      |
| hsa-miR-425_st         | -0.348 | 3.08E-03 | 0.380   | 9.56                   | 9.91                        | 9.73         | 0.593      |
| hsa-miR-125a-5p_st     | 0.446  | 3.41E-03 | 0.399   | 8.71                   | 8.27                        | 8.50         | 0.767      |
| hsa-miR-493_st         | 0.100  | 3.83E-03 | 0.408   | 5.77                   | 5.67                        | 5.72         | 0.174      |
| hsa-miR-134_st         | 0.228  | 3.89E-03 | 0.408   | 6.87                   | 6.64                        | 6.75         | 0.398      |
| hsa-miR-409-3p_st      | 0.289  | 4.04E-03 | 0.408   | 7.10                   | 6.81                        | 6.96         | 0.506      |
| hsa-miR-10b_st         | 0.343  | 4.61E-03 | 0.445   | 7.43                   | 7.09                        | 7.26         | 0.609      |
| hp_hsa-mir-197_st      | 0.064  | 4.82E-03 | 0.446   | 5.99                   | 5.93                        | 5.96         | 0.114      |
| hp_hsa-mir-3160-1_s_st | -0.050 | 5.03E-03 | 0.447   | 5.53                   | 5.58                        | 5.55         | 0.089      |
| hsa-miR-320c_st        | 0.241  | 5.61E-03 | 0.468   | 11.96                  | 11.72                       | 11.85        | 0.437      |
| hsa-miR-432_st         | 0.265  | 5.69E-03 | 0.468   | 6.78                   | 6.52                        | 6.65         | 0.481      |
| hsa-miR-154_st         | 0.100  | 6.60E-03 | 0.518   | 5.68                   | 5.58                        | 5.63         | 0.185      |
| hsa-miR-1197_st        | -0.032 | 6.76E-03 | 0.518   | 5.37                   | 5.40                        | 5.38         | 0.058      |
| hp_hsa-mir-487b_st     | 0.075  | 8.31E-03 | 0.574   | 5.83                   | 5.75                        | 5.79         | 0.143      |
| hsa-miR-181a_st        | 0.283  | 8.71E-03 | 0.574   | 10.11                  | 9.83                        | 9.98         | 0.540      |
| hp_hsa-mir-23a_x_st    | 0.088  | 8.86E-03 | 0.574   | 6.92                   | 6.83                        | 6.88         | 0.168      |
| hsa-miR-320d_st        | 0.237  | 8.94E-03 | 0.574   | 10.29                  | 10.05                       | 10.18        | 0.454      |
| hp_hsa-mir-622_st      | -0.099 | 9.09E-03 | 0.574   | 5.64                   | 5.74                        | 5.69         | 0.190      |
| hp_hsa-mir-4269_st     | 0.043  | 9.71E-03 | 0.574   | 5.49                   | 5.45                        | 5.47         | 0.083      |
| hp_hsa-mir-421_st      | -0.062 | 1.04E-02 | 0.574   | 5.59                   | 5.65                        | 5.62         | 0.121      |
| hsa-miR-29c-star_st    | 0.090  | 1.15E-02 | 0.574   | 5.62                   | 5.53                        | 5.58         | 0.178      |
| hsa-miR-191_st         | -0.200 | 1.18E-02 | 0.574   | 12.15                  | 12.35                       | 12.24        | 0.397      |
| hsa-miR-485-5p_st      | 0.090  | 1.20E-02 | 0.574   | 5.63                   | 5.54                        | 5.59         | 0.180      |
| hp_hsa-mir-1184-1_s_st | 0.037  | 1.20E-02 | 0.574   | 5.56                   | 5.53                        | 5.54         | 0.073      |
| hsa-miR-744_st         | -0.196 | 1.22E-02 | 0.574   | 8.09                   | 8.28                        | 8.18         | 0.391      |
| hsa-miR-4328_st        | 0.027  | 1.23E-02 | 0.574   | 5.34                   | 5.32                        | 5.33         | 0.053      |

|                        |        |          |       |       |       |       |       |
|------------------------|--------|----------|-------|-------|-------|-------|-------|
| hsa-miR-502-5p_st      | -0.045 | 1.23E-02 | 0.574 | 5.47  | 5.51  | 5.49  | 0.090 |
| hsa-miR-3146_st        | -0.032 | 1.33E-02 | 0.574 | 5.33  | 5.36  | 5.35  | 0.064 |
| hsa-miR-125b_st        | 0.415  | 1.33E-02 | 0.574 | 11.03 | 10.62 | 10.83 | 0.838 |
| hsa-miR-362-5p_st      | -0.254 | 1.34E-02 | 0.574 | 7.74  | 7.99  | 7.86  | 0.515 |
| hp_hsa-mir-3118-3_x_st | -0.022 | 1.42E-02 | 0.574 | 5.34  | 5.36  | 5.35  | 0.045 |
| hsa-miR-127-3p_st      | 0.284  | 1.45E-02 | 0.574 | 8.45  | 8.17  | 8.31  | 0.580 |
| hp_hsa-mir-26a-2_x_st  | 0.042  | 1.48E-02 | 0.574 | 5.87  | 5.83  | 5.85  | 0.085 |
| hp_hsa-mir-1276_st     | 0.033  | 1.49E-02 | 0.574 | 5.45  | 5.42  | 5.43  | 0.067 |
| hp_hsa-mir-656_st      | 0.035  | 1.50E-02 | 0.574 | 5.53  | 5.50  | 5.51  | 0.071 |
| hsa-miR-29c_st         | 0.098  | 1.52E-02 | 0.574 | 5.71  | 5.61  | 5.67  | 0.202 |
| hsa-miR-99b_st         | 0.331  | 1.53E-02 | 0.574 | 10.19 | 9.86  | 10.03 | 0.681 |
| hp_hsa-mir-454_st      | 0.030  | 1.54E-02 | 0.574 | 5.45  | 5.42  | 5.44  | 0.062 |
| hp_hsa-mir-648_st      | 0.031  | 1.63E-02 | 0.574 | 5.44  | 5.41  | 5.43  | 0.064 |
| hp_hsa-mir-99b_st      | 0.099  | 1.68E-02 | 0.574 | 6.23  | 6.13  | 6.18  | 0.207 |
| hsa-let-7e_st          | 0.320  | 1.76E-02 | 0.574 | 11.33 | 11.01 | 11.17 | 0.675 |
| hp_hsa-mir-190b_st     | -0.033 | 1.77E-02 | 0.574 | 5.49  | 5.53  | 5.51  | 0.070 |
| hsa-miR-99b-star_st    | 0.195  | 1.77E-02 | 0.574 | 6.62  | 6.43  | 6.53  | 0.410 |
| hsa-miR-626_st         | 0.027  | 1.78E-02 | 0.574 | 5.35  | 5.32  | 5.34  | 0.057 |
| hsa-let-7i-star_st     | 0.044  | 1.84E-02 | 0.574 | 5.57  | 5.53  | 5.55  | 0.093 |
| hsa-miR-18b-star_st    | -0.029 | 1.84E-02 | 0.574 | 5.35  | 5.38  | 5.37  | 0.061 |
| hp_hsa-mir-425_st      | -0.082 | 1.85E-02 | 0.574 | 6.42  | 6.50  | 6.46  | 0.174 |
| hsa-miR-875-3p_st      | 0.036  | 1.90E-02 | 0.574 | 5.41  | 5.38  | 5.40  | 0.076 |
| hsa-miR-609_st         | -0.026 | 1.93E-02 | 0.574 | 5.27  | 5.30  | 5.28  | 0.055 |
| hp_hsa-let-7c_x_st     | 0.036  | 1.93E-02 | 0.574 | 5.45  | 5.41  | 5.43  | 0.077 |
| hsa-miR-500_st         | -0.202 | 2.02E-02 | 0.574 | 7.33  | 7.53  | 7.43  | 0.433 |
| hp_hsa-mir-663_x_st    | -0.264 | 2.07E-02 | 0.574 | 7.73  | 7.99  | 7.86  | 0.570 |
| hp_hsa-mir-382_st      | 0.032  | 2.11E-02 | 0.574 | 5.49  | 5.46  | 5.47  | 0.069 |
| hp_hsa-mir-194-2_x_st  | -0.109 | 2.13E-02 | 0.574 | 7.48  | 7.59  | 7.54  | 0.235 |
| hsa-let-7f_st          | 0.273  | 2.13E-02 | 0.574 | 8.85  | 8.58  | 8.72  | 0.592 |
| hsa-miR-769-5p_st      | -0.123 | 2.13E-02 | 0.574 | 6.10  | 6.23  | 6.16  | 0.267 |
| hp_hsa-mir-4258_st     | -0.030 | 2.14E-02 | 0.574 | 5.33  | 5.36  | 5.35  | 0.064 |
| hp_hsa-mir-194-2_st    | -0.074 | 2.15E-02 | 0.574 | 6.54  | 6.62  | 6.58  | 0.161 |
| hsa-miR-139-3p_st      | 0.069  | 2.16E-02 | 0.574 | 5.66  | 5.59  | 5.63  | 0.149 |
| hsa-miR-758_st         | 0.035  | 2.18E-02 | 0.574 | 5.37  | 5.33  | 5.35  | 0.077 |
| hp_hsa-mir-1302-7_x_st | -0.042 | 2.22E-02 | 0.574 | 5.47  | 5.51  | 5.49  | 0.090 |
| hsa-miR-378_st         | -0.287 | 2.23E-02 | 0.574 | 9.55  | 9.84  | 9.69  | 0.626 |
| hsa-miR-10b-star_st    | 0.077  | 2.24E-02 | 0.574 | 5.62  | 5.55  | 5.59  | 0.167 |
| hsa-miR-139-5p_st      | 0.206  | 2.26E-02 | 0.574 | 6.02  | 5.81  | 5.92  | 0.451 |
| hp_hsa-mir-4293_st     | -0.024 | 2.27E-02 | 0.574 | 5.35  | 5.37  | 5.36  | 0.052 |
| hsa-miR-194-star_st    | -0.245 | 2.28E-02 | 0.574 | 7.12  | 7.36  | 7.24  | 0.538 |
| hp_hsa-mir-28_st       | 0.052  | 2.28E-02 | 0.574 | 5.99  | 5.94  | 5.97  | 0.113 |
| hsa-miR-28-3p_st       | 0.206  | 2.28E-02 | 0.574 | 8.50  | 8.30  | 8.40  | 0.452 |
| hp_hsa-mir-568_st      | 0.026  | 2.32E-02 | 0.574 | 5.37  | 5.34  | 5.35  | 0.056 |
| hsa-miR-193b-star_st   | 0.155  | 2.34E-02 | 0.574 | 6.43  | 6.27  | 6.35  | 0.342 |
| hp_hsa-mir-625_x_st    | -0.061 | 2.39E-02 | 0.574 | 5.77  | 5.83  | 5.80  | 0.135 |
| hp_hsa-mir-214_s_st    | 0.130  | 2.49E-02 | 0.574 | 6.98  | 6.85  | 6.92  | 0.290 |
| hp_hsa-mir-1285-1_x_st | -0.031 | 2.50E-02 | 0.574 | 5.47  | 5.50  | 5.48  | 0.069 |

|                        |        |          |       |       |       |       |       |
|------------------------|--------|----------|-------|-------|-------|-------|-------|
| hp_hsa-mir-124-3_s_st  | 0.058  | 2.52E-02 | 0.574 | 5.52  | 5.46  | 5.49  | 0.130 |
| hsa-miR-421_st         | -0.232 | 2.53E-02 | 0.574 | 6.67  | 6.91  | 6.79  | 0.517 |
| hp_hsa-mir-1308_st     | -0.132 | 2.54E-02 | 0.574 | 7.85  | 7.98  | 7.91  | 0.295 |
| hp_hsa-mir-4256_st     | -0.041 | 2.54E-02 | 0.574 | 5.56  | 5.60  | 5.58  | 0.090 |
| hsa-miR-2116_st        | 0.039  | 2.55E-02 | 0.574 | 5.41  | 5.37  | 5.39  | 0.087 |
| hsa-miR-1308_st        | -0.300 | 2.59E-02 | 0.574 | 11.76 | 12.05 | 11.90 | 0.672 |
| hp_hsa-mir-3148_st     | -0.029 | 2.61E-02 | 0.574 | 5.35  | 5.38  | 5.37  | 0.065 |
| hsa-miR-338-5p_st      | 0.076  | 2.62E-02 | 0.574 | 5.67  | 5.60  | 5.64  | 0.169 |
| hsa-miR-944_st         | -0.021 | 2.62E-02 | 0.574 | 5.32  | 5.34  | 5.33  | 0.047 |
| hp_hsa-mir-624_st      | -0.023 | 2.65E-02 | 0.574 | 5.31  | 5.34  | 5.33  | 0.052 |
| hsa-miR-504_st         | 0.037  | 2.65E-02 | 0.574 | 5.43  | 5.40  | 5.42  | 0.082 |
| hsa-miR-299-5p_st      | 0.041  | 2.67E-02 | 0.574 | 5.52  | 5.48  | 5.50  | 0.091 |
| hsa-miR-486-5p_st      | 0.330  | 2.69E-02 | 0.574 | 6.65  | 6.32  | 6.49  | 0.743 |
| hsa-miR-802_st         | -0.025 | 2.71E-02 | 0.574 | 5.27  | 5.29  | 5.28  | 0.055 |
| hsa-miR-1288_st        | 0.022  | 2.71E-02 | 0.574 | 5.32  | 5.30  | 5.31  | 0.049 |
| hsa-miR-1299_st        | 0.117  | 2.72E-02 | 0.574 | 5.54  | 5.42  | 5.48  | 0.264 |
| hsa-miR-411_st         | 0.056  | 2.87E-02 | 0.592 | 5.62  | 5.56  | 5.59  | 0.127 |
| hsa-miR-3166_st        | -0.030 | 2.88E-02 | 0.592 | 5.40  | 5.43  | 5.41  | 0.068 |
| hp_hsa-mir-199a-1_x_st | 0.104  | 2.90E-02 | 0.592 | 6.84  | 6.73  | 6.79  | 0.238 |
| hsa-miR-320b_st        | 0.201  | 2.96E-02 | 0.592 | 12.23 | 12.03 | 12.13 | 0.460 |
| hp_hsa-mir-409_st      | 0.053  | 2.96E-02 | 0.592 | 5.69  | 5.64  | 5.66  | 0.122 |
| hsa-miR-448_st         | -0.026 | 2.96E-02 | 0.592 | 5.29  | 5.32  | 5.31  | 0.058 |
| hp_hsa-mir-125b-2_x_st | 0.061  | 2.98E-02 | 0.592 | 5.83  | 5.77  | 5.80  | 0.140 |
| hsa-miR-100_st         | 0.331  | 3.07E-02 | 0.604 | 9.56  | 9.23  | 9.40  | 0.763 |
| hsa-miR-409-5p_st      | 0.073  | 3.11E-02 | 0.606 | 5.68  | 5.60  | 5.64  | 0.169 |
| hsa-miR-31-star_st     | 0.135  | 3.15E-02 | 0.606 | 5.51  | 5.37  | 5.44  | 0.313 |
| hp_hsa-mir-3146_st     | -0.021 | 3.18E-02 | 0.606 | 5.33  | 5.35  | 5.34  | 0.049 |
| hsa-miR-25-star_st     | -0.119 | 3.19E-02 | 0.606 | 6.34  | 6.46  | 6.39  | 0.277 |
| hsa-miR-126_st         | 0.261  | 3.27E-02 | 0.613 | 9.81  | 9.55  | 9.68  | 0.608 |
| hsa-miR-93_st          | -0.229 | 3.28E-02 | 0.613 | 11.24 | 11.47 | 11.35 | 0.535 |
| hp_hsa-mir-2278_st     | -0.032 | 3.38E-02 | 0.625 | 5.54  | 5.57  | 5.55  | 0.074 |
| hp_hsa-mir-26a-1_x_st  | 0.051  | 3.46E-02 | 0.632 | 6.56  | 6.51  | 6.54  | 0.120 |
| hp_hsa-mir-106b_st     | -0.070 | 3.57E-02 | 0.632 | 6.28  | 6.35  | 6.32  | 0.165 |
| hp_hsa-mir-652_st      | -0.055 | 3.64E-02 | 0.632 | 6.17  | 6.23  | 6.20  | 0.130 |
| hsa-miR-378-star_st    | -0.164 | 3.66E-02 | 0.632 | 6.40  | 6.57  | 6.48  | 0.390 |
| hp_hsa-mir-2052_st     | 0.019  | 3.67E-02 | 0.632 | 5.33  | 5.31  | 5.32  | 0.044 |
| hp_hsa-mir-520a_x_st   | 0.021  | 3.68E-02 | 0.632 | 5.33  | 5.31  | 5.32  | 0.049 |
| hp_hsa-mir-302a_st     | -0.029 | 3.68E-02 | 0.632 | 5.33  | 5.36  | 5.35  | 0.067 |
| hp_hsa-mir-4324_st     | 0.030  | 3.69E-02 | 0.632 | 5.48  | 5.45  | 5.46  | 0.072 |
| hsa-miR-3192_st        | 0.036  | 3.73E-02 | 0.632 | 5.44  | 5.40  | 5.42  | 0.086 |
| hp_hsa-mir-517a_x_st   | -0.041 | 3.74E-02 | 0.632 | 5.48  | 5.52  | 5.50  | 0.099 |
| hsa-miR-320a_st        | 0.191  | 3.80E-02 | 0.632 | 12.46 | 12.26 | 12.36 | 0.458 |
| hp_hsa-mir-381_st      | 0.026  | 3.81E-02 | 0.632 | 5.42  | 5.39  | 5.40  | 0.061 |
| hp_hsa-mir-31_st       | 0.202  | 3.82E-02 | 0.632 | 6.43  | 6.23  | 6.33  | 0.484 |
| hp_hsa-mir-433_st      | 0.025  | 3.84E-02 | 0.632 | 5.40  | 5.38  | 5.39  | 0.060 |
| hsa-miR-3196_st        | -0.255 | 3.86E-02 | 0.632 | 12.97 | 13.23 | 13.10 | 0.615 |
| hp_hsa-mir-802_st      | 0.021  | 3.87E-02 | 0.632 | 5.34  | 5.32  | 5.33  | 0.050 |

|                        |        |          |       |      |      |      |       |
|------------------------|--------|----------|-------|------|------|------|-------|
| hp_hsa-mir-567_st      | -0.026 | 4.01E-02 | 0.635 | 5.47 | 5.49 | 5.48 | 0.063 |
| hsa-miR-132_st         | 0.229  | 4.02E-02 | 0.635 | 7.80 | 7.57 | 7.69 | 0.557 |
| hsa-miR-551a_st        | -0.030 | 4.04E-02 | 0.635 | 5.42 | 5.45 | 5.43 | 0.071 |
| hsa-miR-329_st         | 0.031  | 4.05E-02 | 0.635 | 5.39 | 5.36 | 5.38 | 0.074 |
| hsa-miR-370_st         | 0.082  | 4.07E-02 | 0.635 | 6.35 | 6.26 | 6.31 | 0.199 |
| hsa-miR-625_st         | -0.261 | 4.08E-02 | 0.635 | 7.20 | 7.46 | 7.33 | 0.636 |
| hsa-miR-199a-3p_st     | 0.319  | 4.09E-02 | 0.635 | 9.70 | 9.39 | 9.55 | 0.776 |
| hp_hsa-mir-500_x_st    | -0.076 | 4.13E-02 | 0.636 | 6.38 | 6.45 | 6.41 | 0.184 |
| hsa-miR-195-star_st    | 0.042  | 4.18E-02 | 0.638 | 5.58 | 5.54 | 5.56 | 0.103 |
| hp_hsa-mir-522_x_st    | -0.062 | 4.20E-02 | 0.638 | 5.55 | 5.61 | 5.58 | 0.151 |
| hp_hsa-mir-3201_x_st   | -0.040 | 4.31E-02 | 0.644 | 5.45 | 5.49 | 5.47 | 0.098 |
| hsa-miR-376c_st        | 0.067  | 4.34E-02 | 0.644 | 5.56 | 5.50 | 5.53 | 0.166 |
| hsa-miR-455-3p_st      | 0.214  | 4.39E-02 | 0.644 | 8.63 | 8.42 | 8.53 | 0.529 |
| hsa-miR-199b-3p_st     | 0.320  | 4.41E-02 | 0.644 | 9.71 | 9.39 | 9.55 | 0.791 |
| hsa-miR-26b_st         | 0.097  | 4.51E-02 | 0.644 | 6.01 | 5.91 | 5.96 | 0.241 |
| hp_hsa-mir-3133_st     | -0.022 | 4.53E-02 | 0.644 | 5.35 | 5.37 | 5.36 | 0.054 |
| hsa-miR-181b_st        | 0.227  | 4.54E-02 | 0.644 | 9.07 | 8.84 | 8.96 | 0.565 |
| hsa-miR-1278_st        | -0.041 | 4.59E-02 | 0.644 | 5.47 | 5.52 | 5.49 | 0.103 |
| hp_hsa-mir-1826_st     | -0.106 | 4.66E-02 | 0.644 | 7.49 | 7.60 | 7.54 | 0.266 |
| hsa-miR-532-5p_st      | -0.208 | 4.70E-02 | 0.644 | 8.69 | 8.90 | 8.79 | 0.520 |
| hp_hsa-mir-758_x_st    | 0.025  | 4.72E-02 | 0.644 | 5.44 | 5.42 | 5.43 | 0.063 |
| hsa-miR-516a-3p_st     | 0.024  | 4.72E-02 | 0.644 | 5.30 | 5.28 | 5.29 | 0.059 |
| hsa-miR-148b-star_st   | -0.023 | 4.76E-02 | 0.644 | 5.32 | 5.34 | 5.33 | 0.056 |
| hp_hsa-mir-152_st      | 0.034  | 4.80E-02 | 0.644 | 5.76 | 5.73 | 5.74 | 0.084 |
| hsa-miR-30a-star_st    | 0.126  | 4.89E-02 | 0.644 | 5.86 | 5.74 | 5.80 | 0.319 |
| hsa-miR-1283_st        | 0.019  | 4.89E-02 | 0.644 | 5.29 | 5.27 | 5.28 | 0.048 |
| hp_hsa-mir-203_st      | -0.047 | 4.96E-02 | 0.644 | 5.86 | 5.91 | 5.89 | 0.119 |
| hsa-miR-184_st         | 0.125  | 4.98E-02 | 0.644 | 5.60 | 5.48 | 5.54 | 0.316 |
| hsa-miR-3143_st        | 0.026  | 5.00E-02 | 0.644 | 5.38 | 5.35 | 5.37 | 0.066 |
| hp_hsa-mir-378c_st     | 0.032  | 5.11E-02 | 0.644 | 5.64 | 5.61 | 5.62 | 0.082 |
| hsa-miR-199a-5p_st     | 0.255  | 5.12E-02 | 0.644 | 9.84 | 9.58 | 9.71 | 0.650 |
| hsa-miR-29a-star_st    | -0.018 | 5.20E-02 | 0.644 | 5.28 | 5.30 | 5.29 | 0.045 |
| hsa-miR-487a_st        | 0.051  | 5.21E-02 | 0.644 | 5.66 | 5.61 | 5.64 | 0.130 |
| hsa-miR-144-star_st    | -0.038 | 5.26E-02 | 0.644 | 5.48 | 5.51 | 5.50 | 0.097 |
| hsa-miR-337-5p_st      | 0.083  | 5.27E-02 | 0.644 | 5.82 | 5.74 | 5.78 | 0.213 |
| hp_hsa-mir-23a_st      | 0.047  | 5.27E-02 | 0.644 | 5.78 | 5.73 | 5.76 | 0.121 |
| hp_hsa-mir-526a-1_x_st | -0.020 | 5.32E-02 | 0.644 | 5.33 | 5.34 | 5.33 | 0.050 |
| hp_hsa-let-7d_x_st     | 0.037  | 5.32E-02 | 0.644 | 6.55 | 6.52 | 6.54 | 0.094 |
| hsa-miR-106b_st        | -0.276 | 5.33E-02 | 0.644 | 9.37 | 9.65 | 9.50 | 0.710 |
| hp_hsa-mir-944_st      | -0.022 | 5.34E-02 | 0.644 | 5.31 | 5.34 | 5.32 | 0.057 |
| hsa-miR-21_st          | 0.234  | 5.37E-02 | 0.644 | 8.07 | 7.84 | 7.96 | 0.603 |
| hsa-miR-4285_st        | -0.045 | 5.38E-02 | 0.644 | 5.60 | 5.64 | 5.62 | 0.117 |
| hp_hsa-mir-125b-1_x_st | 0.044  | 5.41E-02 | 0.644 | 6.14 | 6.09 | 6.12 | 0.113 |
| hsa-miR-200a-star_st   | -0.203 | 5.45E-02 | 0.644 | 7.08 | 7.28 | 7.18 | 0.526 |
| hp_hsa-mir-302a_x_st   | -0.021 | 5.45E-02 | 0.644 | 5.30 | 5.32 | 5.31 | 0.054 |
| hsa-miR-651_st         | 0.019  | 5.46E-02 | 0.644 | 5.31 | 5.29 | 5.30 | 0.049 |
| hsa-miR-101_st         | -0.034 | 5.47E-02 | 0.644 | 5.43 | 5.46 | 5.44 | 0.087 |

|                         |        |          |       |       |       |       |       |
|-------------------------|--------|----------|-------|-------|-------|-------|-------|
| hp_hsa-mir-3152_x_st    | -0.037 | 5.48E-02 | 0.644 | 5.44  | 5.48  | 5.46  | 0.094 |
| hp_hsa-mir-501_x_st     | -0.050 | 5.50E-02 | 0.644 | 5.66  | 5.71  | 5.69  | 0.129 |
| hsa-let-7i_st           | 0.223  | 5.51E-02 | 0.644 | 11.12 | 10.89 | 11.01 | 0.579 |
| hsa-miR-3119_st         | 0.023  | 5.53E-02 | 0.644 | 5.29  | 5.26  | 5.27  | 0.058 |
| hsa-miR-193b_st         | 0.239  | 5.54E-02 | 0.644 | 8.61  | 8.37  | 8.50  | 0.619 |
| hsa-let-7d_st           | 0.146  | 5.56E-02 | 0.644 | 12.10 | 11.95 | 12.03 | 0.378 |
| hp_hsa-mir-3129_st      | -0.021 | 5.62E-02 | 0.644 | 5.38  | 5.40  | 5.39  | 0.054 |
| hp_hsa-mir-4298_st      | 0.027  | 5.62E-02 | 0.644 | 5.58  | 5.55  | 5.57  | 0.070 |
| hsa-miR-425-star_st     | -0.113 | 5.67E-02 | 0.644 | 6.94  | 7.05  | 7.00  | 0.294 |
| hp_hsa-mir-551a_st      | -0.024 | 5.67E-02 | 0.644 | 5.45  | 5.47  | 5.46  | 0.061 |
| hsa-miR-886-3p_st       | -0.336 | 5.68E-02 | 0.644 | 8.75  | 9.09  | 8.91  | 0.876 |
| hp_hsa-mir-148a_st      | 0.039  | 5.68E-02 | 0.644 | 5.76  | 5.72  | 5.74  | 0.100 |
| hsa-miR-135a_st         | 0.023  | 5.73E-02 | 0.644 | 5.30  | 5.27  | 5.29  | 0.059 |
| hp_hsa-mir-1203_st      | -0.025 | 5.74E-02 | 0.644 | 5.50  | 5.52  | 5.51  | 0.065 |
| hsa-miR-192-star_st     | -0.235 | 5.76E-02 | 0.644 | 6.91  | 7.15  | 7.02  | 0.615 |
| hp_hsa-mir-28_x_st      | 0.054  | 5.79E-02 | 0.644 | 6.19  | 6.14  | 6.16  | 0.141 |
| hp_hsa-mir-1248_s_st    | 0.093  | 5.80E-02 | 0.644 | 6.61  | 6.51  | 6.56  | 0.245 |
| hp_hsa-mir-220a_st      | -0.025 | 5.85E-02 | 0.647 | 5.38  | 5.41  | 5.40  | 0.066 |
| hsa-miR-1307_st         | -0.186 | 5.88E-02 | 0.647 | 8.14  | 8.33  | 8.23  | 0.490 |
| hp_hsa-mir-1302-10_s_st | -0.021 | 5.93E-02 | 0.647 | 5.30  | 5.32  | 5.31  | 0.055 |
| hp_hsa-mir-3156-1_x_st  | -0.033 | 5.95E-02 | 0.647 | 5.57  | 5.60  | 5.58  | 0.086 |
| hsa-miR-876-5p_st       | 0.017  | 6.01E-02 | 0.647 | 5.26  | 5.24  | 5.25  | 0.045 |
| hp_hsa-mir-181b-2_st    | -0.035 | 6.05E-02 | 0.647 | 5.34  | 5.37  | 5.35  | 0.092 |
| hsa-miR-4301_st         | 0.023  | 6.07E-02 | 0.647 | 5.34  | 5.32  | 5.33  | 0.061 |
| hp_hsa-mir-548g_x_st    | -0.033 | 6.11E-02 | 0.647 | 5.45  | 5.49  | 5.47  | 0.088 |
| hsa-miR-1291_st         | -0.061 | 6.15E-02 | 0.647 | 5.70  | 5.76  | 5.73  | 0.163 |
| hp_hsa-mir-19b-2_x_st   | 0.025  | 6.20E-02 | 0.647 | 5.42  | 5.40  | 5.41  | 0.065 |
| hsa-miR-574-3p_st       | 0.245  | 6.27E-02 | 0.647 | 8.47  | 8.22  | 8.35  | 0.653 |
| hsa-miR-379_st          | 0.156  | 6.32E-02 | 0.647 | 6.49  | 6.34  | 6.42  | 0.418 |
| hsa-miR-3117_st         | -0.019 | 6.35E-02 | 0.647 | 5.31  | 5.33  | 5.32  | 0.050 |
| hp_hsa-mir-124-2_s_st   | 0.049  | 6.35E-02 | 0.647 | 5.57  | 5.52  | 5.55  | 0.132 |
| hp_hsa-mir-22_st        | 0.038  | 6.37E-02 | 0.647 | 5.83  | 5.79  | 5.81  | 0.102 |
| hsa-miR-922_st          | -0.023 | 6.39E-02 | 0.647 | 5.35  | 5.37  | 5.36  | 0.060 |
| hsa-miR-3201_st         | -0.192 | 6.43E-02 | 0.647 | 6.26  | 6.45  | 6.35  | 0.515 |
| hp_hsa-mir-1323_st      | -0.033 | 6.45E-02 | 0.647 | 5.50  | 5.53  | 5.52  | 0.089 |
| hsa-miR-3173_st         | -0.032 | 6.49E-02 | 0.647 | 5.55  | 5.59  | 5.57  | 0.086 |
| hp_hsa-mir-187_st       | 0.033  | 6.50E-02 | 0.647 | 5.71  | 5.68  | 5.69  | 0.089 |
| hsa-miR-874_st          | 0.131  | 6.52E-02 | 0.647 | 7.04  | 6.91  | 6.98  | 0.353 |
| hp_hsa-mir-20b_x_st     | 0.051  | 6.54E-02 | 0.647 | 5.93  | 5.88  | 5.90  | 0.138 |
| hsa-miR-194_st          | -0.271 | 6.59E-02 | 0.647 | 12.11 | 12.38 | 12.24 | 0.733 |
| hp_hsa-mir-378_x_st     | -0.055 | 6.61E-02 | 0.647 | 5.93  | 5.99  | 5.96  | 0.148 |
| hsa-miR-4279_st         | -0.029 | 6.61E-02 | 0.647 | 5.41  | 5.44  | 5.43  | 0.077 |
| hp_hsa-mir-132_st       | 0.043  | 6.62E-02 | 0.647 | 5.81  | 5.76  | 5.79  | 0.116 |
| hp_hsa-mir-652_x_st     | -0.039 | 6.64E-02 | 0.647 | 5.72  | 5.76  | 5.74  | 0.105 |
| hp_hsa-mir-548i-4_x_st  | -0.031 | 6.69E-02 | 0.647 | 5.42  | 5.45  | 5.44  | 0.084 |
| hsa-miR-663_st          | -0.248 | 6.70E-02 | 0.647 | 10.33 | 10.58 | 10.45 | 0.672 |
| hp_hsa-mir-4325_st      | -0.024 | 6.70E-02 | 0.647 | 5.47  | 5.49  | 5.48  | 0.065 |



|                        |        |          |       |       |       |       |       |
|------------------------|--------|----------|-------|-------|-------|-------|-------|
| hsa-miR-4269_st        | 0.075  | 6.78E-02 | 0.652 | 5.85  | 5.77  | 5.81  | 0.205 |
| hsa-miR-31_st          | 0.638  | 6.84E-02 | 0.655 | 9.51  | 8.87  | 9.20  | 1.740 |
| hp_hsa-mir-936_st      | -0.022 | 6.89E-02 | 0.657 | 5.41  | 5.43  | 5.42  | 0.059 |
| hp_hsa-mir-100_x_st    | 0.032  | 6.93E-02 | 0.658 | 5.48  | 5.45  | 5.46  | 0.087 |
| hsa-miR-627_st         | 0.021  | 7.08E-02 | 0.666 | 5.30  | 5.28  | 5.29  | 0.056 |
| hsa-let-7c_st          | 0.135  | 7.19E-02 | 0.666 | 13.02 | 12.89 | 12.96 | 0.371 |
| hsa-miR-622_st         | -0.156 | 7.19E-02 | 0.666 | 5.97  | 6.13  | 6.05  | 0.432 |
| hsa-miR-99a_st         | 0.327  | 7.20E-02 | 0.666 | 8.98  | 8.65  | 8.82  | 0.902 |
| hp_hsa-mir-507_st      | -0.017 | 7.21E-02 | 0.666 | 5.29  | 5.31  | 5.30  | 0.047 |
| hp_hsa-mir-1249_st     | 0.030  | 7.23E-02 | 0.666 | 5.55  | 5.52  | 5.53  | 0.081 |
| hsa-miR-182_st         | -0.267 | 7.25E-02 | 0.666 | 8.99  | 9.25  | 9.12  | 0.739 |
| hp_hsa-mir-574_st      | 0.058  | 7.25E-02 | 0.666 | 6.58  | 6.52  | 6.55  | 0.161 |
| hp_hsa-mir-3171_st     | -0.016 | 7.29E-02 | 0.666 | 5.30  | 5.31  | 5.30  | 0.044 |
| hp_hsa-mir-548i-4_st   | -0.030 | 7.35E-02 | 0.666 | 5.44  | 5.48  | 5.46  | 0.084 |
| hsa-miR-544_st         | -0.021 | 7.36E-02 | 0.666 | 5.29  | 5.31  | 5.30  | 0.057 |
| hsa-miR-411-star_st    | 0.024  | 7.37E-02 | 0.666 | 5.45  | 5.43  | 5.44  | 0.067 |
| hsa-miR-513a-3p_st     | 0.022  | 7.42E-02 | 0.666 | 5.38  | 5.36  | 5.37  | 0.060 |
| hp_hsa-let-7a-3_st     | 0.020  | 7.44E-02 | 0.666 | 5.40  | 5.38  | 5.39  | 0.054 |
| hp_hsa-mir-758_st      | 0.017  | 7.48E-02 | 0.667 | 5.38  | 5.36  | 5.37  | 0.046 |
| hsa-miR-576-5p_st      | 0.020  | 7.60E-02 | 0.675 | 5.36  | 5.34  | 5.35  | 0.055 |
| hsa-let-7f-2-star_st   | 0.018  | 7.65E-02 | 0.675 | 5.32  | 5.31  | 5.31  | 0.049 |
| hsa-miR-138-1-star_st  | 0.067  | 7.66E-02 | 0.675 | 5.65  | 5.58  | 5.62  | 0.187 |
| hsa-miR-515-3p_st      | 0.020  | 7.70E-02 | 0.675 | 5.31  | 5.29  | 5.30  | 0.055 |
| hp_hsa-mir-518c_x_st   | -0.020 | 7.73E-02 | 0.675 | 5.32  | 5.34  | 5.33  | 0.055 |
| hsa-miR-124_st         | 0.071  | 7.75E-02 | 0.675 | 5.82  | 5.75  | 5.79  | 0.201 |
| hsa-miR-195_st         | 0.288  | 7.80E-02 | 0.676 | 9.08  | 8.79  | 8.94  | 0.812 |
| hsa-miR-330-5p_st      | 0.029  | 7.88E-02 | 0.676 | 5.47  | 5.44  | 5.46  | 0.081 |
| hp_hsa-mir-1178_st     | -0.025 | 7.91E-02 | 0.676 | 5.45  | 5.47  | 5.46  | 0.071 |
| hsa-miR-30a_st         | 0.183  | 7.92E-02 | 0.676 | 7.31  | 7.13  | 7.22  | 0.518 |
| hsa-miR-3175_st        | -0.159 | 7.93E-02 | 0.676 | 7.90  | 8.06  | 7.98  | 0.451 |
| hp_hsa-mir-2116_st     | 0.023  | 7.96E-02 | 0.676 | 5.45  | 5.43  | 5.44  | 0.066 |
| hsa-miR-92b_st         | 0.123  | 7.97E-02 | 0.676 | 6.90  | 6.78  | 6.84  | 0.349 |
| hsa-miR-217_st         | 0.036  | 8.00E-02 | 0.676 | 5.41  | 5.37  | 5.39  | 0.102 |
| hp_hsa-mir-1-2_x_st    | -0.018 | 8.08E-02 | 0.677 | 5.35  | 5.37  | 5.36  | 0.051 |
| hp_hsa-mir-617_st      | -0.017 | 8.08E-02 | 0.677 | 5.36  | 5.38  | 5.37  | 0.047 |
| hsa-miR-15a_st         | 0.187  | 8.18E-02 | 0.683 | 7.06  | 6.87  | 6.97  | 0.532 |
| hp_hsa-mir-514-1_s_st  | 0.017  | 8.29E-02 | 0.684 | 5.33  | 5.31  | 5.32  | 0.049 |
| hsa-miR-155_st         | -0.260 | 8.30E-02 | 0.684 | 9.61  | 9.87  | 9.74  | 0.744 |
| hsa-miR-125a-3p_st     | 0.088  | 8.31E-02 | 0.684 | 6.60  | 6.51  | 6.56  | 0.251 |
| hsa-miR-125b-1-star_st | 0.074  | 8.39E-02 | 0.684 | 5.98  | 5.91  | 5.95  | 0.214 |
| hsa-miR-96_st          | -0.028 | 8.42E-02 | 0.684 | 5.39  | 5.42  | 5.41  | 0.079 |
| hp_hsa-mir-764_st      | 0.026  | 8.53E-02 | 0.684 | 5.55  | 5.53  | 5.54  | 0.076 |
| hp_hsa-mir-377_st      | 0.020  | 8.56E-02 | 0.684 | 5.44  | 5.42  | 5.43  | 0.057 |
| hp_hsa-mir-4280_st     | 0.017  | 8.57E-02 | 0.684 | 5.37  | 5.36  | 5.36  | 0.050 |
| hsa-miR-127-5p_st      | 0.031  | 8.58E-02 | 0.684 | 5.46  | 5.43  | 5.45  | 0.089 |
| hp_hsa-mir-124-1_s_st  | 0.046  | 8.60E-02 | 0.684 | 5.57  | 5.53  | 5.55  | 0.132 |
| hsa-miR-1292_st        | -0.068 | 8.62E-02 | 0.684 | 5.89  | 5.95  | 5.92  | 0.197 |

|                        |        |          |       |       |       |       |       |
|------------------------|--------|----------|-------|-------|-------|-------|-------|
| hsa-miR-1265_st        | 0.025  | 8.67E-02 | 0.684 | 5.39  | 5.37  | 5.38  | 0.073 |
| hp_hsa-mir-129-1_st    | -0.018 | 8.67E-02 | 0.684 | 5.35  | 5.37  | 5.36  | 0.052 |
| hp_hsa-mir-1301_st     | -0.040 | 8.70E-02 | 0.684 | 5.65  | 5.69  | 5.67  | 0.116 |
| hsa-miR-1470_st        | -0.026 | 8.72E-02 | 0.684 | 5.50  | 5.53  | 5.52  | 0.076 |
| hsa-miR-3138_st        | 0.086  | 8.74E-02 | 0.684 | 5.95  | 5.87  | 5.91  | 0.249 |
| hp_hsa-mir-4296_st     | 0.031  | 8.76E-02 | 0.684 | 5.78  | 5.75  | 5.77  | 0.090 |
| hp_hsa-mir-3168_st     | -0.021 | 8.91E-02 | 0.684 | 5.37  | 5.39  | 5.38  | 0.061 |
| hp_hsa-mir-106a_x_st   | -0.028 | 8.91E-02 | 0.684 | 5.79  | 5.82  | 5.80  | 0.080 |
| hp_hsa-mir-1234_st     | -0.049 | 8.94E-02 | 0.684 | 5.79  | 5.84  | 5.82  | 0.142 |
| hp_hsa-mir-1285-2_st   | -0.022 | 8.95E-02 | 0.684 | 5.43  | 5.45  | 5.44  | 0.062 |
| hsa-miR-638_st         | -0.154 | 8.95E-02 | 0.684 | 13.21 | 13.36 | 13.28 | 0.450 |
| hp_hsa-mir-4275_st     | -0.067 | 9.01E-02 | 0.684 | 5.77  | 5.84  | 5.80  | 0.197 |
| hp_hsa-mir-92b_st      | 0.048  | 9.04E-02 | 0.684 | 5.97  | 5.93  | 5.95  | 0.139 |
| hsa-miR-671-3p_st      | 0.040  | 9.08E-02 | 0.684 | 5.64  | 5.60  | 5.62  | 0.117 |
| hp_hsa-mir-212_st      | 0.026  | 9.14E-02 | 0.684 | 5.61  | 5.58  | 5.60  | 0.077 |
| hsa-miR-363_st         | 0.115  | 9.14E-02 | 0.684 | 5.71  | 5.59  | 5.65  | 0.338 |
| hsa-miR-1301_st        | -0.132 | 9.24E-02 | 0.684 | 6.47  | 6.60  | 6.54  | 0.390 |
| hsa-miR-654-3p_st      | 0.056  | 9.25E-02 | 0.684 | 5.57  | 5.52  | 5.55  | 0.165 |
| hp_hsa-mir-4294_st     | -0.026 | 9.30E-02 | 0.684 | 5.55  | 5.58  | 5.57  | 0.075 |
| hp_hsa-mir-548t_x_st   | -0.021 | 9.30E-02 | 0.684 | 5.33  | 5.35  | 5.34  | 0.060 |
| hp_hsa-mir-3166_st     | 0.016  | 9.33E-02 | 0.684 | 5.35  | 5.34  | 5.34  | 0.046 |
| hsa-miR-500b_st        | 0.018  | 9.33E-02 | 0.684 | 5.34  | 5.33  | 5.33  | 0.052 |
| hsa-miR-369-3p_st      | -0.017 | 9.36E-02 | 0.684 | 5.29  | 5.30  | 5.30  | 0.051 |
| hp_hsa-mir-548l_x_st   | -0.026 | 9.37E-02 | 0.684 | 5.52  | 5.55  | 5.54  | 0.077 |
| hp_hsa-mir-548f-3_st   | -0.015 | 9.43E-02 | 0.684 | 5.35  | 5.37  | 5.36  | 0.044 |
| hp_hsa-mir-1260_st     | -0.054 | 9.44E-02 | 0.684 | 6.08  | 6.13  | 6.11  | 0.159 |
| hsa-miR-3130-5p_st     | -0.031 | 9.47E-02 | 0.684 | 5.47  | 5.50  | 5.49  | 0.092 |
| hp_hsa-mir-127_st      | 0.026  | 9.48E-02 | 0.684 | 5.73  | 5.71  | 5.72  | 0.075 |
| hsa-miR-23a_st         | 0.146  | 9.57E-02 | 0.684 | 12.94 | 12.79 | 12.87 | 0.435 |
| hp_hsa-mir-583_x_st    | -0.023 | 9.58E-02 | 0.684 | 5.40  | 5.42  | 5.41  | 0.068 |
| hp_hsa-mir-29a_x_st    | 0.041  | 9.60E-02 | 0.684 | 5.95  | 5.91  | 5.93  | 0.121 |
| hsa-miR-29b-2-star_st  | 0.127  | 9.60E-02 | 0.684 | 6.36  | 6.23  | 6.30  | 0.380 |
| hsa-miR-199b-5p_st     | 0.068  | 9.62E-02 | 0.684 | 5.60  | 5.53  | 5.57  | 0.202 |
| hsa-miR-378c_st        | -0.194 | 9.72E-02 | 0.684 | 8.35  | 8.54  | 8.44  | 0.579 |
| hp_hsa-mir-302f_st     | -0.023 | 9.73E-02 | 0.684 | 5.36  | 5.39  | 5.38  | 0.069 |
| hp_hsa-mir-886_st      | -0.220 | 9.74E-02 | 0.684 | 7.83  | 8.05  | 7.93  | 0.658 |
| hsa-miR-146a_st        | -0.292 | 9.74E-02 | 0.684 | 8.65  | 8.94  | 8.79  | 0.874 |
| hsa-miR-599_st         | 0.017  | 9.75E-02 | 0.684 | 5.31  | 5.30  | 5.31  | 0.049 |
| hp_hsa-mir-3164_st     | -0.021 | 9.77E-02 | 0.684 | 5.36  | 5.38  | 5.37  | 0.061 |
| hp_hsa-mir-548h-1_x_st | -0.021 | 9.79E-02 | 0.684 | 5.33  | 5.35  | 5.34  | 0.062 |
| hsa-miR-181a-2-star_st | 0.127  | 9.81E-02 | 0.684 | 6.43  | 6.31  | 6.37  | 0.381 |
| hsa-miR-3065-5p_st     | 0.027  | 9.83E-02 | 0.684 | 5.42  | 5.40  | 5.41  | 0.081 |
| hsa-miR-142-5p_st      | 0.019  | 9.93E-02 | 0.686 | 5.35  | 5.33  | 5.34  | 0.056 |
| hp_hsa-mir-193b_st     | 0.040  | 9.98E-02 | 0.686 | 5.81  | 5.77  | 5.79  | 0.119 |
| hsa-miR-3194_st        | -0.042 | 1.00E-01 | 0.686 | 5.73  | 5.77  | 5.75  | 0.127 |
| hp_hsa-mir-148a_x_st   | 0.035  | 1.00E-01 | 0.686 | 5.60  | 5.56  | 5.58  | 0.106 |
| hsa-miR-664-star_st    | 0.122  | 1.00E-01 | 0.686 | 6.58  | 6.45  | 6.52  | 0.369 |

|                       |        |          |       |       |       |       |       |
|-----------------------|--------|----------|-------|-------|-------|-------|-------|
| hp_hsa-mir-301a_st    | -0.016 | 1.01E-01 | 0.686 | 5.31  | 5.32  | 5.31  | 0.046 |
| hsa-miR-514b-3p_st    | 0.017  | 1.02E-01 | 0.686 | 5.29  | 5.28  | 5.29  | 0.050 |
| hsa-miR-887_st        | 0.044  | 1.02E-01 | 0.686 | 5.72  | 5.67  | 5.69  | 0.132 |
| hsa-miR-376a-star_st  | -0.020 | 1.02E-01 | 0.686 | 5.34  | 5.36  | 5.35  | 0.058 |
| hsa-miR-663b_st       | -0.206 | 1.02E-01 | 0.686 | 7.88  | 8.08  | 7.98  | 0.625 |
| hsa-miR-196b-star_st  | -0.183 | 1.02E-01 | 0.686 | 6.24  | 6.42  | 6.32  | 0.555 |
| hp_hsa-let-7d_st      | 0.040  | 1.04E-01 | 0.691 | 6.39  | 6.35  | 6.37  | 0.120 |
| hsa-miR-675_st        | -0.193 | 1.04E-01 | 0.691 | 6.53  | 6.72  | 6.62  | 0.589 |
| hp_hsa-mir-631_st     | -0.033 | 1.04E-01 | 0.691 | 5.56  | 5.59  | 5.58  | 0.100 |
| hp_hsa-mir-1538_st    | -0.033 | 1.04E-01 | 0.691 | 5.65  | 5.68  | 5.66  | 0.102 |
| hsa-miR-377-star_st   | 0.039  | 1.04E-01 | 0.692 | 5.47  | 5.43  | 5.45  | 0.118 |
| hsa-miR-4255_st       | 0.021  | 1.05E-01 | 0.695 | 5.47  | 5.45  | 5.46  | 0.062 |
| hsa-miR-219-5p_st     | -0.019 | 1.06E-01 | 0.696 | 5.28  | 5.30  | 5.29  | 0.058 |
| hsa-miR-3178_st       | -0.210 | 1.07E-01 | 0.700 | 10.05 | 10.26 | 10.15 | 0.645 |
| hsa-miR-1979_st       | 0.128  | 1.07E-01 | 0.700 | 9.28  | 9.15  | 9.22  | 0.393 |
| hsa-miR-376a_st       | 0.020  | 1.08E-01 | 0.704 | 5.40  | 5.38  | 5.39  | 0.061 |
| hsa-miR-200c_st       | -0.144 | 1.09E-01 | 0.705 | 13.16 | 13.30 | 13.23 | 0.446 |
| hsa-miR-4295_st       | 0.018  | 1.09E-01 | 0.705 | 5.31  | 5.29  | 5.30  | 0.055 |
| hp_hsa-mir-3192_st    | -0.020 | 1.09E-01 | 0.705 | 5.39  | 5.41  | 5.40  | 0.062 |
| hsa-miR-124-star_st   | 0.021  | 1.09E-01 | 0.705 | 5.39  | 5.37  | 5.38  | 0.064 |
| hp_hsa-mir-124-3_x_st | 0.016  | 1.09E-01 | 0.705 | 5.38  | 5.36  | 5.37  | 0.050 |
| hp_hsa-mir-3145_x_st  | -0.015 | 1.11E-01 | 0.707 | 5.36  | 5.37  | 5.37  | 0.045 |
| hsa-miR-30c_st        | 0.169  | 1.11E-01 | 0.707 | 8.74  | 8.58  | 8.66  | 0.524 |
| hp_hsa-mir-1291_s_st  | -0.048 | 1.11E-01 | 0.707 | 5.76  | 5.80  | 5.78  | 0.148 |
| hsa-miR-95_st         | -0.034 | 1.11E-01 | 0.707 | 5.35  | 5.39  | 5.37  | 0.106 |
| hp_hsa-mir-1247_st    | -0.029 | 1.11E-01 | 0.707 | 5.52  | 5.55  | 5.54  | 0.091 |
| hsa-miR-203_st        | -0.311 | 1.12E-01 | 0.708 | 7.98  | 8.30  | 8.14  | 0.970 |
| hp_hsa-mir-548e_st    | -0.037 | 1.12E-01 | 0.708 | 5.61  | 5.64  | 5.63  | 0.114 |
| hp_hsa-mir-623_st     | -0.018 | 1.13E-01 | 0.711 | 5.36  | 5.37  | 5.37  | 0.054 |
| hsa-miR-22-star_st    | 0.053  | 1.14E-01 | 0.711 | 5.60  | 5.54  | 5.57  | 0.167 |
| hsa-miR-193a-5p_st    | 0.145  | 1.14E-01 | 0.711 | 7.84  | 7.70  | 7.77  | 0.454 |
| hsa-miR-1908_st       | -0.227 | 1.14E-01 | 0.711 | 11.50 | 11.73 | 11.61 | 0.712 |
| hsa-miR-1_st          | 0.029  | 1.14E-01 | 0.711 | 5.41  | 5.38  | 5.40  | 0.089 |
| hsa-miR-886-5p_st     | -0.266 | 1.15E-01 | 0.711 | 7.99  | 8.25  | 8.11  | 0.834 |
| hsa-miR-491-5p_st     | -0.104 | 1.15E-01 | 0.712 | 6.32  | 6.42  | 6.37  | 0.326 |
| hp_hsa-mir-339_st     | -0.043 | 1.16E-01 | 0.712 | 6.14  | 6.18  | 6.16  | 0.136 |
| hp_hsa-mir-765_st     | -0.016 | 1.16E-01 | 0.712 | 5.41  | 5.43  | 5.42  | 0.051 |
| hsa-miR-497_st        | 0.202  | 1.18E-01 | 0.715 | 7.47  | 7.27  | 7.37  | 0.638 |
| hsa-let-7a_st         | 0.137  | 1.18E-01 | 0.715 | 13.09 | 12.95 | 13.02 | 0.434 |
| hp_hsa-mir-379_st     | 0.035  | 1.18E-01 | 0.715 | 5.53  | 5.49  | 5.51  | 0.110 |
| hsa-miR-607_st        | -0.018 | 1.18E-01 | 0.715 | 5.39  | 5.41  | 5.40  | 0.057 |
| hp_hsa-mir-182_st     | -0.059 | 1.18E-01 | 0.715 | 6.30  | 6.36  | 6.33  | 0.186 |
| hp_hsa-mir-3161_st    | 0.017  | 1.18E-01 | 0.715 | 5.37  | 5.35  | 5.36  | 0.053 |
| hsa-let-7c-star_st    | -0.019 | 1.19E-01 | 0.719 | 5.33  | 5.35  | 5.34  | 0.059 |
| hsa-miR-302e_st       | 0.020  | 1.19E-01 | 0.719 | 5.40  | 5.38  | 5.39  | 0.063 |
| hsa-miR-23a-star_st   | 0.094  | 1.21E-01 | 0.725 | 6.40  | 6.30  | 6.35  | 0.300 |
| hp_hsa-mir-548p_x_st  | -0.015 | 1.22E-01 | 0.726 | 5.33  | 5.35  | 5.34  | 0.049 |

|                       |        |          |       |       |       |       |       |
|-----------------------|--------|----------|-------|-------|-------|-------|-------|
| hsa-miR-3191_st       | -0.031 | 1.23E-01 | 0.726 | 5.58  | 5.61  | 5.60  | 0.099 |
| hp_hsa-mir-614_st     | -0.023 | 1.23E-01 | 0.726 | 5.51  | 5.53  | 5.52  | 0.075 |
| hsa-miR-302d-star_st  | 0.023  | 1.23E-01 | 0.726 | 5.54  | 5.51  | 5.52  | 0.073 |
| hsa-miR-2054_st       | 0.015  | 1.23E-01 | 0.726 | 5.28  | 5.27  | 5.27  | 0.047 |
| hsa-miR-4253_st       | 0.097  | 1.23E-01 | 0.726 | 6.23  | 6.13  | 6.18  | 0.311 |
| hp_hsa-mir-548f-4_st  | -0.017 | 1.23E-01 | 0.726 | 5.40  | 5.42  | 5.41  | 0.055 |
| hp_hsa-mir-500b_x_st  | -0.036 | 1.24E-01 | 0.726 | 5.87  | 5.90  | 5.88  | 0.115 |
| hp_hsa-mir-770_st     | -0.037 | 1.24E-01 | 0.727 | 5.82  | 5.85  | 5.83  | 0.121 |
| hsa-miR-372_st        | -0.020 | 1.25E-01 | 0.727 | 5.33  | 5.35  | 5.34  | 0.063 |
| hsa-miR-888_st        | -0.015 | 1.25E-01 | 0.727 | 5.28  | 5.30  | 5.29  | 0.049 |
| hp_hsa-mir-125b-2_st  | 0.027  | 1.25E-01 | 0.727 | 5.43  | 5.40  | 5.42  | 0.088 |
| hsa-miR-3181_st       | -0.055 | 1.26E-01 | 0.727 | 5.65  | 5.71  | 5.68  | 0.177 |
| hsa-miR-924_st        | 0.018  | 1.26E-01 | 0.727 | 5.36  | 5.34  | 5.35  | 0.058 |
| hp_hsa-let-7e_st      | 0.037  | 1.27E-01 | 0.727 | 5.88  | 5.84  | 5.86  | 0.121 |
| hsa-miR-1204_st       | -0.020 | 1.27E-01 | 0.727 | 5.33  | 5.35  | 5.34  | 0.065 |
| hp_hsa-mir-1275_st    | -0.035 | 1.28E-01 | 0.727 | 5.94  | 5.98  | 5.96  | 0.115 |
| hp_hsa-mir-3125_st    | -0.019 | 1.28E-01 | 0.727 | 5.43  | 5.45  | 5.44  | 0.063 |
| hsa-miR-371-3p_st     | -0.018 | 1.28E-01 | 0.727 | 5.36  | 5.38  | 5.37  | 0.056 |
| hp_hsa-let-7g_x_st    | 0.031  | 1.29E-01 | 0.727 | 5.79  | 5.76  | 5.78  | 0.100 |
| hsa-miR-635_st        | -0.030 | 1.29E-01 | 0.727 | 5.45  | 5.48  | 5.46  | 0.099 |
| hsa-miR-3177_st       | -0.044 | 1.30E-01 | 0.727 | 5.88  | 5.93  | 5.91  | 0.144 |
| hp_hsa-mir-105-1_s_st | -0.020 | 1.30E-01 | 0.727 | 5.37  | 5.39  | 5.38  | 0.066 |
| hsa-miR-210_st        | -0.267 | 1.30E-01 | 0.727 | 9.48  | 9.75  | 9.61  | 0.875 |
| hsa-miR-1909_st       | -0.221 | 1.30E-01 | 0.727 | 8.14  | 8.36  | 8.25  | 0.725 |
| hp_hsa-mir-195_st     | 0.029  | 1.31E-01 | 0.727 | 5.82  | 5.79  | 5.80  | 0.096 |
| hp_hsa-mir-524_x_st   | 0.022  | 1.31E-01 | 0.727 | 5.45  | 5.42  | 5.43  | 0.073 |
| hsa-miR-192_st        | -0.240 | 1.31E-01 | 0.727 | 11.09 | 11.33 | 11.21 | 0.788 |
| hsa-miR-146b-5p_st    | 0.208  | 1.31E-01 | 0.727 | 7.59  | 7.38  | 7.49  | 0.682 |
| hp_hsa-mir-485_st     | 0.020  | 1.31E-01 | 0.727 | 5.45  | 5.43  | 5.44  | 0.066 |
| hp_hsa-mir-933_st     | -0.052 | 1.31E-01 | 0.727 | 6.32  | 6.37  | 6.35  | 0.170 |
| hsa-miR-302b_st       | -0.017 | 1.32E-01 | 0.727 | 5.27  | 5.28  | 5.27  | 0.056 |
| hp_hsa-mir-98_st      | 0.027  | 1.32E-01 | 0.728 | 5.71  | 5.68  | 5.70  | 0.088 |
| hsa-miR-562_st        | -0.017 | 1.32E-01 | 0.728 | 5.27  | 5.28  | 5.28  | 0.054 |
| hsa-miR-570_st        | -0.041 | 1.34E-01 | 0.735 | 5.53  | 5.57  | 5.55  | 0.136 |
| hp_hsa-mir-200b_x_st  | -0.052 | 1.34E-01 | 0.735 | 6.65  | 6.71  | 6.68  | 0.172 |
| hp_hsa-mir-190_st     | -0.023 | 1.35E-01 | 0.735 | 5.42  | 5.44  | 5.43  | 0.077 |
| hsa-miR-1228-star_st  | -0.212 | 1.36E-01 | 0.738 | 11.33 | 11.55 | 11.44 | 0.703 |
| hp_hsa-mir-632_st     | -0.034 | 1.36E-01 | 0.739 | 5.84  | 5.87  | 5.85  | 0.111 |
| hsa-miR-365_st        | 0.019  | 1.36E-01 | 0.739 | 5.35  | 5.33  | 5.34  | 0.062 |
| hsa-miR-3160_st       | 0.019  | 1.37E-01 | 0.741 | 5.48  | 5.46  | 5.47  | 0.064 |
| hp_hsa-mir-651_st     | -0.022 | 1.38E-01 | 0.741 | 5.40  | 5.42  | 5.41  | 0.072 |
| hp_hsa-mir-675_st     | -0.063 | 1.38E-01 | 0.741 | 5.95  | 6.01  | 5.98  | 0.210 |
| hp_hsa-let-7a-2_st    | 0.017  | 1.38E-01 | 0.741 | 5.39  | 5.37  | 5.38  | 0.057 |
| hsa-miR-4284_st       | -0.203 | 1.38E-01 | 0.741 | 10.05 | 10.25 | 10.15 | 0.679 |
| hp_hsa-mir-1274a_st   | -0.044 | 1.39E-01 | 0.741 | 5.70  | 5.74  | 5.72  | 0.147 |
| hp_hsa-mir-4318_st    | -0.014 | 1.40E-01 | 0.743 | 5.38  | 5.39  | 5.38  | 0.047 |
| hp_hsa-mir-506_st     | 0.014  | 1.40E-01 | 0.743 | 5.35  | 5.34  | 5.34  | 0.047 |

|                        |        |          |       |      |      |      |       |
|------------------------|--------|----------|-------|------|------|------|-------|
| hsa-miR-520a-3p_st     | 0.017  | 1.40E-01 | 0.744 | 5.31 | 5.30 | 5.30 | 0.057 |
| hsa-miR-1976_st        | -0.025 | 1.41E-01 | 0.746 | 5.42 | 5.45 | 5.43 | 0.083 |
| hsa-miR-548k_st        | 0.018  | 1.42E-01 | 0.746 | 5.37 | 5.36 | 5.37 | 0.062 |
| hp_hsa-mir-133a-2_x_st | 0.018  | 1.42E-01 | 0.746 | 5.39 | 5.37 | 5.38 | 0.061 |
| hp_hsa-mir-3120_s_st   | -0.022 | 1.42E-01 | 0.746 | 5.60 | 5.62 | 5.61 | 0.072 |
| hp_hsa-mir-196b_st     | -0.045 | 1.43E-01 | 0.746 | 5.52 | 5.57 | 5.54 | 0.151 |
| hsa-miR-769-3p_st      | -0.055 | 1.43E-01 | 0.746 | 5.71 | 5.76 | 5.73 | 0.185 |
| hp_hsa-mir-362_st      | -0.045 | 1.43E-01 | 0.746 | 5.88 | 5.93 | 5.91 | 0.154 |
| hsa-miR-33a-star_st    | -0.014 | 1.43E-01 | 0.746 | 5.30 | 5.31 | 5.30 | 0.048 |
| hsa-miR-652_st         | -0.152 | 1.44E-01 | 0.748 | 8.34 | 8.49 | 8.41 | 0.516 |
| hsa-miR-133a_st        | 0.164  | 1.45E-01 | 0.751 | 6.08 | 5.92 | 6.00 | 0.558 |
| hp_hsa-mir-320d-2_x_st | 0.023  | 1.45E-01 | 0.751 | 5.55 | 5.53 | 5.54 | 0.078 |
| hp_hsa-mir-502_st      | -0.022 | 1.46E-01 | 0.753 | 5.60 | 5.62 | 5.61 | 0.073 |
| hp_hsa-mir-2355_st     | 0.019  | 1.47E-01 | 0.755 | 5.40 | 5.38 | 5.39 | 0.064 |
| hsa-miR-3202_st        | 0.024  | 1.48E-01 | 0.755 | 5.50 | 5.48 | 5.49 | 0.081 |
| hsa-miR-431_st         | 0.040  | 1.48E-01 | 0.755 | 5.61 | 5.57 | 5.59 | 0.136 |
| hp_hsa-mir-520c_x_st   | 0.018  | 1.48E-01 | 0.755 | 5.37 | 5.35 | 5.36 | 0.061 |
| hsa-miR-568_st         | 0.013  | 1.48E-01 | 0.755 | 5.29 | 5.27 | 5.28 | 0.044 |
| hsa-miR-3128_st        | -0.095 | 1.50E-01 | 0.762 | 5.81 | 5.91 | 5.86 | 0.327 |
| hsa-miR-548p_st        | -0.018 | 1.50E-01 | 0.762 | 5.32 | 5.34 | 5.33 | 0.063 |
| hsa-miR-212_st         | 0.074  | 1.51E-01 | 0.762 | 6.03 | 5.96 | 6.00 | 0.255 |
| hp_hsa-mir-1202_st     | -0.029 | 1.51E-01 | 0.762 | 5.80 | 5.83 | 5.81 | 0.101 |
| hp_hsa-mir-491_st      | -0.032 | 1.52E-01 | 0.762 | 5.84 | 5.87 | 5.85 | 0.109 |
| hp_hsa-mir-191_st      | -0.028 | 1.52E-01 | 0.762 | 5.82 | 5.85 | 5.84 | 0.097 |
| hsa-miR-520a-5p_st     | -0.016 | 1.53E-01 | 0.762 | 5.29 | 5.30 | 5.30 | 0.054 |
| hp_hsa-mir-299_st      | 0.019  | 1.53E-01 | 0.762 | 5.45 | 5.43 | 5.44 | 0.064 |
| hp_hsa-mir-1254_st     | -0.018 | 1.53E-01 | 0.762 | 5.49 | 5.50 | 5.50 | 0.061 |
| hsa-miR-558_st         | 0.016  | 1.53E-01 | 0.762 | 5.31 | 5.29 | 5.30 | 0.055 |
| hp_hsa-mir-520h_s_st   | -0.071 | 1.54E-01 | 0.762 | 5.98 | 6.05 | 6.01 | 0.245 |
| hsa-miR-138-2-star_st  | 0.021  | 1.54E-01 | 0.762 | 5.54 | 5.52 | 5.53 | 0.072 |
| hp_hsa-mir-627_x_st    | -0.015 | 1.54E-01 | 0.762 | 5.42 | 5.44 | 5.43 | 0.051 |
| hp_hsa-mir-1289-1_x_st | -0.038 | 1.54E-01 | 0.762 | 5.79 | 5.83 | 5.81 | 0.132 |
| hsa-miR-1271_st        | 0.097  | 1.55E-01 | 0.762 | 6.18 | 6.09 | 6.14 | 0.338 |
| hsa-miR-2117_st        | -0.015 | 1.55E-01 | 0.764 | 5.27 | 5.29 | 5.28 | 0.050 |
| hp_hsa-let-7i_st       | 0.029  | 1.56E-01 | 0.765 | 5.76 | 5.73 | 5.74 | 0.101 |
| hp_hsa-mir-192_st      | -0.030 | 1.57E-01 | 0.768 | 5.58 | 5.61 | 5.60 | 0.105 |
| hsa-let-7d-star_st     | -0.054 | 1.57E-01 | 0.768 | 5.65 | 5.70 | 5.67 | 0.187 |
| hp_hsa-mir-455_st      | 0.033  | 1.58E-01 | 0.769 | 5.75 | 5.72 | 5.73 | 0.116 |
| hsa-miR-493-star_st    | 0.022  | 1.59E-01 | 0.774 | 5.36 | 5.34 | 5.35 | 0.075 |
| hp_hsa-mir-580_st      | -0.012 | 1.60E-01 | 0.776 | 5.34 | 5.36 | 5.35 | 0.043 |
| hsa-miR-10a_st         | 0.216  | 1.61E-01 | 0.776 | 8.77 | 8.55 | 8.67 | 0.763 |
| hp_hsa-mir-451_st      | 0.033  | 1.61E-01 | 0.776 | 5.60 | 5.57 | 5.59 | 0.117 |
| hsa-miR-148a_st        | 0.149  | 1.62E-01 | 0.778 | 6.61 | 6.46 | 6.54 | 0.527 |
| hsa-miR-489_st         | 0.077  | 1.62E-01 | 0.778 | 5.82 | 5.74 | 5.78 | 0.272 |
| hp_hsa-mir-412_st      | -0.020 | 1.62E-01 | 0.779 | 5.42 | 5.44 | 5.43 | 0.070 |
| hsa-miR-455-5p_st      | 0.038  | 1.65E-01 | 0.782 | 5.54 | 5.51 | 5.53 | 0.136 |
| hp_hsa-mir-1979_st     | -0.060 | 1.65E-01 | 0.782 | 5.80 | 5.86 | 5.83 | 0.214 |

|                        |        |          |       |       |       |       |       |
|------------------------|--------|----------|-------|-------|-------|-------|-------|
| hp_hsa-mir-223_st      | 0.015  | 1.66E-01 | 0.782 | 5.45  | 5.44  | 5.44  | 0.054 |
| hp_hsa-mir-516a-1_s_st | 0.018  | 1.67E-01 | 0.782 | 5.33  | 5.31  | 5.32  | 0.063 |
| hsa-miR-509-3p_st      | 0.130  | 1.67E-01 | 0.782 | 5.74  | 5.61  | 5.68  | 0.467 |
| hsa-miR-518e-star_st   | -0.018 | 1.67E-01 | 0.782 | 5.39  | 5.41  | 5.40  | 0.065 |
| hp_hsa-mir-1302-9_s_st | -0.014 | 1.67E-01 | 0.782 | 5.31  | 5.33  | 5.32  | 0.049 |
| hp_hsa-mir-520g_s_st   | -0.066 | 1.68E-01 | 0.782 | 5.96  | 6.03  | 5.99  | 0.236 |
| hsa-miR-1205_st        | 0.018  | 1.68E-01 | 0.782 | 5.36  | 5.34  | 5.35  | 0.065 |
| hp_hsa-mir-320c-2_x_st | 0.031  | 1.68E-01 | 0.782 | 6.00  | 5.97  | 5.99  | 0.111 |
| hsa-miR-4326_st        | 0.019  | 1.69E-01 | 0.782 | 5.35  | 5.33  | 5.34  | 0.066 |
| hp_hsa-mir-1909_st     | -0.075 | 1.70E-01 | 0.782 | 6.33  | 6.40  | 6.36  | 0.272 |
| hsa-let-7g_st          | 0.161  | 1.71E-01 | 0.782 | 8.92  | 8.76  | 8.85  | 0.580 |
| hp_hsa-mir-93_st       | -0.033 | 1.71E-01 | 0.782 | 6.03  | 6.06  | 6.05  | 0.119 |
| hp_hsa-mir-3144_st     | 0.015  | 1.72E-01 | 0.782 | 5.43  | 5.42  | 5.43  | 0.055 |
| hsa-miR-4294_st        | 0.028  | 1.72E-01 | 0.782 | 5.57  | 5.54  | 5.55  | 0.101 |
| hsa-miR-380-star_st    | 0.014  | 1.72E-01 | 0.782 | 5.35  | 5.34  | 5.34  | 0.050 |
| hp_hsa-mir-519c_x_st   | -0.014 | 1.72E-01 | 0.782 | 5.37  | 5.38  | 5.38  | 0.051 |
| hp_hsa-mir-520f_st     | -0.018 | 1.72E-01 | 0.782 | 5.40  | 5.41  | 5.40  | 0.063 |
| hsa-miR-22_st          | 0.137  | 1.72E-01 | 0.782 | 10.32 | 10.18 | 10.25 | 0.498 |
| hsa-miR-548d-3p_st     | 0.016  | 1.73E-01 | 0.782 | 5.39  | 5.38  | 5.38  | 0.056 |
| hsa-miR-29a_st         | 0.177  | 1.73E-01 | 0.782 | 9.82  | 9.64  | 9.73  | 0.643 |
| hsa-miR-410_st         | 0.018  | 1.73E-01 | 0.782 | 5.37  | 5.35  | 5.36  | 0.066 |
| hsa-miR-518a-3p_st     | -0.021 | 1.74E-01 | 0.782 | 5.48  | 5.50  | 5.49  | 0.075 |
| hp_hsa-mir-633_st      | 0.016  | 1.74E-01 | 0.782 | 5.40  | 5.39  | 5.40  | 0.058 |
| hp_hsa-mir-663b_x_st   | -0.084 | 1.74E-01 | 0.782 | 6.41  | 6.50  | 6.45  | 0.306 |
| hsa-miR-1975_st        | 0.087  | 1.74E-01 | 0.782 | 13.57 | 13.48 | 13.52 | 0.317 |
| hp_hsa-mir-630_st      | 0.015  | 1.75E-01 | 0.782 | 5.35  | 5.34  | 5.34  | 0.054 |
| hsa-miR-513b_st        | -0.032 | 1.75E-01 | 0.782 | 5.53  | 5.56  | 5.55  | 0.117 |
| hp_hsa-mir-3188_st     | -0.048 | 1.75E-01 | 0.782 | 6.46  | 6.51  | 6.48  | 0.174 |
| hp_hsa-mir-107_x_st    | -0.015 | 1.75E-01 | 0.782 | 5.95  | 5.96  | 5.95  | 0.053 |
| hp_hsa-mir-200c_st     | -0.041 | 1.75E-01 | 0.782 | 7.02  | 7.06  | 7.04  | 0.150 |
| hsa-miR-1274b_st       | -0.216 | 1.75E-01 | 0.782 | 8.96  | 9.18  | 9.07  | 0.789 |
| hsa-miR-1276_st        | -0.019 | 1.75E-01 | 0.782 | 5.38  | 5.40  | 5.39  | 0.068 |
| hp_hsa-mir-4297_st     | -0.047 | 1.76E-01 | 0.782 | 5.82  | 5.87  | 5.84  | 0.171 |
| hp_hsa-mir-618_st      | -0.017 | 1.76E-01 | 0.782 | 5.39  | 5.40  | 5.39  | 0.062 |
| hp_hsa-mir-124-1_x_st  | 0.014  | 1.76E-01 | 0.782 | 5.38  | 5.37  | 5.38  | 0.049 |
| hsa-miR-2115-star_st   | 0.028  | 1.77E-01 | 0.782 | 5.62  | 5.59  | 5.60  | 0.102 |
| hsa-miR-92a-2-star_st  | -0.021 | 1.77E-01 | 0.782 | 5.35  | 5.37  | 5.36  | 0.078 |
| hsa-miR-1264_st        | -0.014 | 1.78E-01 | 0.783 | 5.28  | 5.30  | 5.29  | 0.050 |
| hp_hsa-mir-218-1_st    | 0.014  | 1.78E-01 | 0.783 | 5.40  | 5.39  | 5.40  | 0.052 |
| hp_hsa-mir-524_st      | 0.039  | 1.78E-01 | 0.783 | 5.62  | 5.58  | 5.60  | 0.144 |
| hsa-miR-1243_st        | -0.013 | 1.78E-01 | 0.783 | 5.34  | 5.35  | 5.35  | 0.047 |
| hp_hsa-mir-486_x_st    | 0.054  | 1.79E-01 | 0.784 | 5.77  | 5.72  | 5.75  | 0.198 |
| hsa-miR-1469_st        | -0.167 | 1.80E-01 | 0.784 | 11.76 | 11.93 | 11.84 | 0.617 |
| hsa-miR-3199_st        | -0.016 | 1.81E-01 | 0.784 | 5.33  | 5.35  | 5.34  | 0.058 |
| hp_hsa-mir-1304_st     | 0.017  | 1.81E-01 | 0.784 | 5.43  | 5.42  | 5.42  | 0.063 |
| hp_hsa-mir-4306_st     | 0.017  | 1.81E-01 | 0.784 | 5.42  | 5.40  | 5.41  | 0.062 |
| hsa-miR-105_st         | -0.099 | 1.81E-01 | 0.784 | 5.41  | 5.51  | 5.46  | 0.367 |

|                      |        |          |       |      |      |      |       |
|----------------------|--------|----------|-------|------|------|------|-------|
| hsa-miR-369-5p_st    | 0.015  | 1.81E-01 | 0.784 | 5.39 | 5.38 | 5.38 | 0.056 |
| hsa-let-7f-1-star_st | 0.032  | 1.82E-01 | 0.784 | 5.69 | 5.66 | 5.67 | 0.119 |
| hp_hsa-mir-1-1_x_st  | -0.013 | 1.82E-01 | 0.784 | 5.33 | 5.34 | 5.34 | 0.049 |
| hsa-miR-520c-3p_st   | 0.016  | 1.82E-01 | 0.784 | 5.41 | 5.39 | 5.40 | 0.059 |
| hp_hsa-mir-222_st    | -0.039 | 1.83E-01 | 0.784 | 6.50 | 6.54 | 6.52 | 0.144 |
| hp_hsa-mir-591_st    | 0.018  | 1.83E-01 | 0.784 | 5.55 | 5.53 | 5.54 | 0.066 |
| hsa-miR-190b_st      | 0.015  | 1.83E-01 | 0.784 | 5.41 | 5.40 | 5.40 | 0.054 |
| hsa-miR-98_st        | 0.051  | 1.84E-01 | 0.785 | 6.02 | 5.96 | 5.99 | 0.191 |
| hsa-miR-451_st       | 0.127  | 1.84E-01 | 0.785 | 6.29 | 6.17 | 6.23 | 0.475 |
| hsa-miR-548q_st      | 0.030  | 1.85E-01 | 0.789 | 5.54 | 5.51 | 5.53 | 0.112 |
| hsa-miR-361-3p_st    | 0.029  | 1.87E-01 | 0.793 | 5.50 | 5.47 | 5.49 | 0.107 |
| hp_hsa-mir-7-2_st    | -0.031 | 1.89E-01 | 0.796 | 5.73 | 5.76 | 5.75 | 0.116 |
| hsa-miR-208a_st      | -0.017 | 1.90E-01 | 0.796 | 5.38 | 5.39 | 5.38 | 0.062 |
| hsa-miR-133b_st      | 0.087  | 1.90E-01 | 0.796 | 5.73 | 5.64 | 5.69 | 0.330 |
| hp_hsa-mir-3197_st   | -0.043 | 1.90E-01 | 0.796 | 6.03 | 6.07 | 6.05 | 0.160 |
| hsa-miR-379-star_st  | 0.015  | 1.90E-01 | 0.796 | 5.32 | 5.31 | 5.31 | 0.057 |
| hsa-miR-183-star_st  | -0.054 | 1.91E-01 | 0.796 | 5.94 | 5.99 | 5.96 | 0.206 |
| hp_hsa-mir-4285_st   | -0.052 | 1.91E-01 | 0.796 | 6.02 | 6.07 | 6.05 | 0.195 |
| hsa-miR-490-5p_st    | 0.085  | 1.91E-01 | 0.796 | 5.82 | 5.74 | 5.78 | 0.323 |
| hp_hsa-mir-3174_st   | 0.013  | 1.91E-01 | 0.796 | 5.37 | 5.36 | 5.36 | 0.048 |
| hsa-miR-662_st       | -0.024 | 1.91E-01 | 0.796 | 5.57 | 5.59 | 5.58 | 0.090 |
| hsa-miR-1244_st      | -0.104 | 1.92E-01 | 0.796 | 6.06 | 6.16 | 6.11 | 0.395 |
| hp_hsa-mir-548e_x_st | -0.027 | 1.93E-01 | 0.796 | 5.52 | 5.55 | 5.53 | 0.104 |
| hp_hsa-mir-378c_x_st | -0.021 | 1.93E-01 | 0.796 | 5.89 | 5.91 | 5.90 | 0.079 |
| hsa-miR-130a_st      | 0.135  | 1.93E-01 | 0.796 | 7.71 | 7.57 | 7.64 | 0.513 |
| hsa-miR-603_st       | -0.043 | 1.93E-01 | 0.796 | 5.56 | 5.60 | 5.58 | 0.164 |
| hp_hsa-mir-101-2_st  | 0.012  | 1.93E-01 | 0.796 | 5.35 | 5.34 | 5.34 | 0.045 |
| hsa-miR-4254_st      | 0.018  | 1.94E-01 | 0.797 | 5.44 | 5.42 | 5.43 | 0.068 |
| hp_hsa-mir-563_st    | 0.012  | 1.95E-01 | 0.797 | 5.33 | 5.32 | 5.32 | 0.044 |
| hp_hsa-mir-620_x_st  | -0.021 | 1.95E-01 | 0.797 | 5.39 | 5.41 | 5.40 | 0.079 |
| hp_hsa-mir-1269_st   | 0.021  | 1.95E-01 | 0.797 | 5.56 | 5.54 | 5.55 | 0.081 |
| hp_hsa-mir-144_st    | -0.018 | 1.95E-01 | 0.797 | 5.44 | 5.46 | 5.45 | 0.066 |
| hp_hsa-mir-378_st    | -0.031 | 1.96E-01 | 0.800 | 5.66 | 5.69 | 5.68 | 0.117 |
| hsa-miR-1273d_st     | 0.057  | 1.97E-01 | 0.800 | 6.13 | 6.07 | 6.10 | 0.217 |
| hp_hsa-mir-146b_st   | 0.028  | 1.98E-01 | 0.803 | 5.63 | 5.60 | 5.61 | 0.108 |
| hsa-miR-3148_st      | 0.021  | 1.99E-01 | 0.803 | 5.46 | 5.44 | 5.45 | 0.079 |
| hp_hsa-mir-376b_x_st | -0.018 | 1.99E-01 | 0.803 | 5.38 | 5.40 | 5.39 | 0.069 |
| hp_hsa-mir-890_st    | -0.017 | 2.00E-01 | 0.804 | 5.40 | 5.42 | 5.41 | 0.064 |
| hsa-miR-3149_st      | 0.027  | 2.00E-01 | 0.804 | 5.52 | 5.50 | 5.51 | 0.104 |
| hsa-miR-935_st       | -0.039 | 2.01E-01 | 0.804 | 5.55 | 5.59 | 5.57 | 0.149 |
| hsa-miR-129-3p_st    | -0.019 | 2.01E-01 | 0.804 | 5.47 | 5.49 | 5.48 | 0.071 |
| hp_hsa-mir-449b_x_st | 0.018  | 2.01E-01 | 0.804 | 5.47 | 5.45 | 5.46 | 0.068 |
| hp_hsa-mir-584_st    | 0.021  | 2.02E-01 | 0.804 | 5.56 | 5.54 | 5.55 | 0.080 |
| hsa-miR-100-star_st  | -0.017 | 2.02E-01 | 0.804 | 5.39 | 5.40 | 5.39 | 0.064 |
| hp_hsa-mir-486_st    | -0.019 | 2.02E-01 | 0.804 | 5.48 | 5.49 | 5.49 | 0.072 |
| hsa-miR-567_st       | 0.015  | 2.02E-01 | 0.804 | 5.33 | 5.32 | 5.32 | 0.056 |
| hsa-miR-4307_st      | 0.014  | 2.02E-01 | 0.804 | 5.31 | 5.30 | 5.31 | 0.054 |

|                        |        |          |       |       |       |       |       |
|------------------------|--------|----------|-------|-------|-------|-------|-------|
| hp_hsa-mir-4320_st     | -0.034 | 2.04E-01 | 0.807 | 5.71  | 5.74  | 5.72  | 0.133 |
| hp_hsa-mir-33a_st      | -0.012 | 2.04E-01 | 0.807 | 5.30  | 5.31  | 5.31  | 0.047 |
| hsa-miR-3180-3p_st     | -0.157 | 2.05E-01 | 0.808 | 7.39  | 7.54  | 7.46  | 0.614 |
| hp_hsa-mir-891a_x_st   | -0.014 | 2.05E-01 | 0.808 | 5.37  | 5.38  | 5.37  | 0.052 |
| hsa-miR-302a_st        | -0.014 | 2.06E-01 | 0.809 | 5.30  | 5.31  | 5.31  | 0.054 |
| hp_hsa-mir-512-1_s_st  | -0.016 | 2.07E-01 | 0.812 | 5.51  | 5.52  | 5.51  | 0.064 |
| hp_hsa-mir-302b_st     | 0.013  | 2.08E-01 | 0.815 | 5.34  | 5.33  | 5.33  | 0.052 |
| hsa-miR-592_st         | -0.050 | 2.08E-01 | 0.815 | 5.40  | 5.45  | 5.43  | 0.197 |
| hp_hsa-mir-489_st      | -0.017 | 2.09E-01 | 0.818 | 5.53  | 5.55  | 5.54  | 0.067 |
| hp_hsa-mir-424_st      | 0.025  | 2.10E-01 | 0.818 | 5.61  | 5.58  | 5.60  | 0.096 |
| hp_hsa-mir-3118-4_x_st | -0.014 | 2.10E-01 | 0.819 | 5.30  | 5.32  | 5.31  | 0.053 |
| hsa-miR-583_st         | -0.018 | 2.13E-01 | 0.825 | 5.37  | 5.39  | 5.38  | 0.069 |
| hsa-miR-106a_st        | -0.201 | 2.14E-01 | 0.825 | 11.42 | 11.62 | 11.52 | 0.800 |
| hp_hsa-mir-583_st      | -0.015 | 2.15E-01 | 0.825 | 5.49  | 5.51  | 5.50  | 0.059 |
| hp_hsa-mir-548f-1_x_st | -0.025 | 2.15E-01 | 0.825 | 5.47  | 5.49  | 5.48  | 0.100 |
| hp_hsa-mir-220a_s_st   | -0.024 | 2.15E-01 | 0.825 | 5.62  | 5.64  | 5.63  | 0.094 |
| hp_hsa-mir-1915_st     | -0.037 | 2.15E-01 | 0.825 | 6.05  | 6.08  | 6.06  | 0.148 |
| hsa-miR-3074_st        | 0.017  | 2.15E-01 | 0.825 | 5.42  | 5.41  | 5.42  | 0.069 |
| hp_hsa-mir-3162_st     | 0.035  | 2.16E-01 | 0.825 | 5.83  | 5.80  | 5.81  | 0.138 |
| hp_hsa-mir-188_st      | -0.026 | 2.16E-01 | 0.825 | 5.64  | 5.67  | 5.65  | 0.102 |
| hp_hsa-mir-29b-2_st    | 0.018  | 2.16E-01 | 0.825 | 5.41  | 5.39  | 5.40  | 0.071 |
| hsa-miR-1251_st        | 0.015  | 2.16E-01 | 0.825 | 5.43  | 5.42  | 5.42  | 0.058 |
| hsa-miR-4259_st        | -0.050 | 2.17E-01 | 0.825 | 5.72  | 5.77  | 5.75  | 0.201 |
| hp_hsa-mir-762_st      | -0.034 | 2.17E-01 | 0.825 | 6.65  | 6.68  | 6.66  | 0.136 |
| hsa-miR-3176_st        | -0.102 | 2.17E-01 | 0.825 | 6.63  | 6.73  | 6.68  | 0.410 |
| hp_hsa-mir-3136_st     | -0.014 | 2.17E-01 | 0.826 | 5.39  | 5.40  | 5.39  | 0.054 |
| hsa-miR-3171_st        | 0.012  | 2.18E-01 | 0.828 | 5.31  | 5.30  | 5.30  | 0.049 |
| hsa-miR-522-star_st    | -0.013 | 2.19E-01 | 0.828 | 5.31  | 5.33  | 5.32  | 0.053 |
| hp_hsa-mir-518a-2_x_st | -0.020 | 2.19E-01 | 0.828 | 5.60  | 5.62  | 5.60  | 0.079 |
| hsa-miR-145-star_st    | 0.035  | 2.21E-01 | 0.830 | 5.52  | 5.49  | 5.51  | 0.140 |
| hsa-miR-324-5p_st      | -0.098 | 2.21E-01 | 0.830 | 8.01  | 8.10  | 8.05  | 0.394 |
| hsa-miR-130b-star_st   | -0.014 | 2.21E-01 | 0.830 | 5.31  | 5.32  | 5.31  | 0.055 |
| hsa-miR-1274a_st       | -0.184 | 2.22E-01 | 0.830 | 6.88  | 7.07  | 6.97  | 0.742 |
| hp_hsa-mir-330_st      | -0.022 | 2.22E-01 | 0.830 | 5.54  | 5.56  | 5.55  | 0.090 |
| hp_hsa-mir-487a_st     | 0.017  | 2.22E-01 | 0.830 | 5.49  | 5.47  | 5.48  | 0.067 |
| hsa-miR-2116-star_st   | 0.020  | 2.23E-01 | 0.830 | 5.48  | 5.46  | 5.47  | 0.081 |
| hsa-miR-24-2-star_st   | 0.081  | 2.23E-01 | 0.830 | 6.29  | 6.21  | 6.25  | 0.330 |
| hp_hsa-mir-1243_st     | 0.016  | 2.23E-01 | 0.830 | 5.42  | 5.41  | 5.42  | 0.064 |
| hp_hsa-mir-337_x_st    | 0.015  | 2.24E-01 | 0.832 | 5.52  | 5.51  | 5.52  | 0.062 |
| hp_hsa-mir-1204_st     | 0.023  | 2.25E-01 | 0.832 | 5.45  | 5.43  | 5.44  | 0.093 |
| hp_hsa-mir-138-1_st    | -0.021 | 2.26E-01 | 0.832 | 5.63  | 5.65  | 5.64  | 0.087 |
| hp_hsa-mir-598_st      | 0.017  | 2.26E-01 | 0.832 | 5.60  | 5.58  | 5.59  | 0.069 |
| hsa-miR-449c_st        | -0.016 | 2.26E-01 | 0.832 | 5.33  | 5.35  | 5.34  | 0.064 |
| hp_hsa-mir-1200_st     | -0.017 | 2.27E-01 | 0.832 | 5.42  | 5.43  | 5.42  | 0.067 |
| hsa-miR-767-5p_st      | -0.089 | 2.27E-01 | 0.832 | 5.36  | 5.45  | 5.40  | 0.365 |
| hp_hsa-mir-363_st      | -0.017 | 2.28E-01 | 0.832 | 5.40  | 5.41  | 5.40  | 0.068 |
| hp_hsa-mir-1280_st     | 0.024  | 2.28E-01 | 0.832 | 5.98  | 5.96  | 5.97  | 0.099 |



|                        |        |          |       |       |       |       |       |
|------------------------|--------|----------|-------|-------|-------|-------|-------|
| hsa-miR-518c-star_st   | 0.024  | 2.29E-01 | 0.832 | 5.53  | 5.50  | 5.52  | 0.099 |
| hsa-miR-198_st         | 0.043  | 2.29E-01 | 0.832 | 6.01  | 5.97  | 5.99  | 0.177 |
| hsa-miR-612_st         | -0.033 | 2.31E-01 | 0.832 | 5.55  | 5.59  | 5.57  | 0.136 |
| hp_hsa-mir-345_st      | 0.019  | 2.31E-01 | 0.832 | 5.62  | 5.60  | 5.61  | 0.079 |
| hp_hsa-mir-1252_x_st   | -0.012 | 2.32E-01 | 0.832 | 5.38  | 5.39  | 5.38  | 0.051 |
| hp_hsa-mir-548h-3_x_st | -0.012 | 2.32E-01 | 0.832 | 5.34  | 5.35  | 5.34  | 0.050 |
| hsa-miR-3126-3p_st     | -0.016 | 2.32E-01 | 0.832 | 5.40  | 5.42  | 5.41  | 0.066 |
| hp_hsa-mir-3148_x_st   | -0.017 | 2.33E-01 | 0.832 | 5.42  | 5.44  | 5.43  | 0.068 |
| hsa-miR-519b-5p_st     | 0.015  | 2.33E-01 | 0.832 | 5.41  | 5.39  | 5.40  | 0.063 |
| hp_hsa-mir-1228_st     | -0.035 | 2.33E-01 | 0.832 | 5.99  | 6.02  | 6.00  | 0.145 |
| hp_hsa-mir-4284_st     | -0.046 | 2.33E-01 | 0.832 | 7.16  | 7.21  | 7.18  | 0.191 |
| hsa-miR-335_st         | -0.048 | 2.34E-01 | 0.832 | 5.67  | 5.72  | 5.69  | 0.200 |
| hsa-miR-92a-1-star_st  | 0.056  | 2.34E-01 | 0.832 | 5.72  | 5.67  | 5.69  | 0.232 |
| hp_hsa-mir-3177_st     | -0.015 | 2.34E-01 | 0.832 | 5.61  | 5.62  | 5.61  | 0.064 |
| hp_hsa-mir-3065_s_st   | 0.014  | 2.34E-01 | 0.832 | 5.35  | 5.33  | 5.34  | 0.056 |
| hsa-miR-3127_st        | 0.034  | 2.34E-01 | 0.832 | 5.73  | 5.69  | 5.71  | 0.140 |
| hp_hsa-mir-196a-1_x_st | -0.018 | 2.35E-01 | 0.832 | 5.44  | 5.46  | 5.45  | 0.074 |
| hp_hsa-mir-138-2_x_st  | 0.018  | 2.35E-01 | 0.832 | 5.54  | 5.52  | 5.53  | 0.074 |
| hp_hsa-mir-139_st      | 0.031  | 2.35E-01 | 0.832 | 5.77  | 5.74  | 5.76  | 0.130 |
| hsa-miR-1273_st        | 0.021  | 2.35E-01 | 0.832 | 5.47  | 5.45  | 5.46  | 0.088 |
| hp_hsa-mir-558_x_st    | 0.012  | 2.35E-01 | 0.832 | 5.33  | 5.32  | 5.33  | 0.051 |
| hp_hsa-mir-877_st      | -0.023 | 2.35E-01 | 0.832 | 5.70  | 5.73  | 5.71  | 0.097 |
| hsa-miR-4261_st        | 0.054  | 2.36E-01 | 0.832 | 5.91  | 5.86  | 5.89  | 0.226 |
| hp_hsa-mir-3202-2_s_st | -0.012 | 2.37E-01 | 0.832 | 5.32  | 5.34  | 5.33  | 0.050 |
| hp_hsa-mir-155_st      | -0.063 | 2.37E-01 | 0.832 | 6.66  | 6.72  | 6.69  | 0.261 |
| hsa-miR-214_st         | 0.177  | 2.37E-01 | 0.832 | 11.24 | 11.06 | 11.15 | 0.741 |
| hp_hsa-mir-3130-2_s_st | 0.015  | 2.37E-01 | 0.832 | 5.41  | 5.40  | 5.40  | 0.064 |
| hsa-miR-185_st         | -0.093 | 2.38E-01 | 0.832 | 9.36  | 9.45  | 9.41  | 0.388 |
| hsa-miR-2114_st        | 0.015  | 2.39E-01 | 0.832 | 5.34  | 5.32  | 5.33  | 0.064 |
| hsa-miR-16_st          | 0.109  | 2.39E-01 | 0.832 | 11.84 | 11.73 | 11.78 | 0.459 |
| hp_hsa-mir-320b-1_x_st | -0.018 | 2.39E-01 | 0.832 | 5.53  | 5.55  | 5.54  | 0.077 |
| hsa-miR-365-star_st    | -0.037 | 2.40E-01 | 0.832 | 5.77  | 5.81  | 5.79  | 0.157 |
| hsa-miR-29b_st         | 0.061  | 2.40E-01 | 0.832 | 5.68  | 5.61  | 5.65  | 0.256 |
| hsa-miR-296-3p_st      | -0.057 | 2.41E-01 | 0.832 | 6.11  | 6.17  | 6.14  | 0.242 |
| hsa-miR-101-star_st    | 0.016  | 2.41E-01 | 0.832 | 5.31  | 5.29  | 5.30  | 0.068 |
| hsa-miR-720_st         | -0.155 | 2.41E-01 | 0.832 | 12.31 | 12.46 | 12.38 | 0.654 |
| hp_hsa-mir-2117_st     | -0.018 | 2.41E-01 | 0.832 | 5.44  | 5.46  | 5.45  | 0.074 |
| hsa-miR-507_st         | 0.012  | 2.42E-01 | 0.832 | 5.28  | 5.27  | 5.28  | 0.049 |
| hp_hsa-mir-1226_st     | -0.033 | 2.42E-01 | 0.832 | 5.76  | 5.79  | 5.77  | 0.140 |
| hsa-miR-516b_st        | -0.015 | 2.42E-01 | 0.834 | 5.41  | 5.43  | 5.42  | 0.061 |
| hp_hsa-mir-548v_x_st   | 0.015  | 2.43E-01 | 0.834 | 5.41  | 5.39  | 5.40  | 0.064 |
| hp_hsa-mir-3182_st     | -0.019 | 2.44E-01 | 0.834 | 5.45  | 5.47  | 5.46  | 0.082 |
| hsa-miR-18a_st         | -0.222 | 2.45E-01 | 0.834 | 7.78  | 8.01  | 7.89  | 0.944 |
| hsa-miR-668_st         | -0.032 | 2.45E-01 | 0.834 | 5.64  | 5.67  | 5.65  | 0.135 |
| hp_hsa-mir-548n_st     | -0.018 | 2.45E-01 | 0.834 | 5.57  | 5.58  | 5.58  | 0.075 |
| hp_hsa-mir-3179-3_s_st | 0.014  | 2.45E-01 | 0.834 | 5.47  | 5.46  | 5.47  | 0.060 |
| hp_hsa-mir-577_st      | 0.013  | 2.46E-01 | 0.834 | 5.35  | 5.33  | 5.34  | 0.053 |

|                        |        |          |       |       |       |       |       |
|------------------------|--------|----------|-------|-------|-------|-------|-------|
| hsa-miR-9_st           | -0.010 | 2.47E-01 | 0.834 | 5.27  | 5.28  | 5.27  | 0.043 |
| hp_hsa-mir-550-2_s_st  | 0.025  | 2.47E-01 | 0.834 | 5.84  | 5.81  | 5.82  | 0.106 |
| hsa-miR-604_st         | 0.023  | 2.47E-01 | 0.834 | 5.59  | 5.57  | 5.58  | 0.099 |
| hp_hsa-mir-605_st      | -0.013 | 2.48E-01 | 0.834 | 5.46  | 5.48  | 5.47  | 0.055 |
| hsa-miR-424-star_st    | 0.103  | 2.48E-01 | 0.834 | 6.36  | 6.26  | 6.31  | 0.440 |
| hsa-miR-130b_st        | -0.117 | 2.48E-01 | 0.834 | 8.40  | 8.52  | 8.46  | 0.501 |
| hp_hsa-mir-509-3_s_st  | 0.028  | 2.48E-01 | 0.834 | 5.40  | 5.38  | 5.39  | 0.121 |
| hsa-miR-564_st         | -0.037 | 2.48E-01 | 0.834 | 5.90  | 5.93  | 5.91  | 0.158 |
| hp_hsa-mir-380_st      | 0.012  | 2.49E-01 | 0.834 | 5.33  | 5.32  | 5.33  | 0.049 |
| hp_hsa-mir-320d-1_st   | 0.013  | 2.49E-01 | 0.834 | 5.31  | 5.29  | 5.30  | 0.053 |
| hsa-miR-3185_st        | -0.207 | 2.50E-01 | 0.834 | 9.83  | 10.04 | 9.93  | 0.889 |
| hsa-miR-518a-5p_st     | 0.015  | 2.50E-01 | 0.834 | 5.36  | 5.35  | 5.35  | 0.062 |
| hsa-miR-521_st         | -0.012 | 2.50E-01 | 0.834 | 5.35  | 5.36  | 5.36  | 0.052 |
| hsa-miR-1206_st        | -0.011 | 2.51E-01 | 0.834 | 5.28  | 5.29  | 5.29  | 0.047 |
| hp_hsa-mir-1302-4_st   | 0.014  | 2.52E-01 | 0.834 | 5.39  | 5.37  | 5.38  | 0.060 |
| hp_hsa-mir-1270-2_s_st | 0.011  | 2.52E-01 | 0.834 | 5.38  | 5.37  | 5.37  | 0.047 |
| hp_hsa-mir-1182_st     | -0.017 | 2.53E-01 | 0.834 | 5.54  | 5.56  | 5.55  | 0.072 |
| hsa-miR-23b-star_st    | 0.060  | 2.53E-01 | 0.834 | 5.90  | 5.84  | 5.87  | 0.261 |
| hsa-miR-412_st         | 0.015  | 2.54E-01 | 0.834 | 5.42  | 5.41  | 5.42  | 0.066 |
| hp_hsa-mir-335_st      | -0.021 | 2.54E-01 | 0.834 | 5.62  | 5.64  | 5.63  | 0.091 |
| hp_hsa-mir-3154_st     | 0.052  | 2.54E-01 | 0.834 | 6.45  | 6.40  | 6.43  | 0.225 |
| hsa-miR-1972_st        | -0.056 | 2.54E-01 | 0.834 | 6.78  | 6.83  | 6.81  | 0.242 |
| hp_hsa-mir-761_st      | -0.012 | 2.54E-01 | 0.834 | 5.41  | 5.42  | 5.41  | 0.050 |
| hsa-miR-1282_st        | 0.012  | 2.55E-01 | 0.834 | 5.26  | 5.25  | 5.25  | 0.050 |
| hp_hsa-mir-1976_st     | -0.047 | 2.55E-01 | 0.834 | 6.13  | 6.17  | 6.15  | 0.204 |
| hsa-miR-3118_st        | 0.026  | 2.55E-01 | 0.834 | 5.37  | 5.34  | 5.36  | 0.113 |
| hp_hsa-mir-3150_st     | -0.024 | 2.55E-01 | 0.834 | 5.86  | 5.88  | 5.87  | 0.105 |
| hsa-miR-188-5p_st      | -0.058 | 2.56E-01 | 0.834 | 6.08  | 6.14  | 6.11  | 0.254 |
| hp_hsa-mir-1262_x_st   | -0.016 | 2.56E-01 | 0.834 | 5.36  | 5.37  | 5.37  | 0.067 |
| hsa-miR-186-star_st    | 0.015  | 2.57E-01 | 0.834 | 5.31  | 5.29  | 5.30  | 0.064 |
| hp_hsa-mir-1307_st     | -0.014 | 2.57E-01 | 0.834 | 5.42  | 5.44  | 5.43  | 0.060 |
| hsa-miR-508-5p_st      | -0.018 | 2.58E-01 | 0.834 | 5.49  | 5.51  | 5.50  | 0.078 |
| hsa-miR-1913_st        | -0.054 | 2.58E-01 | 0.834 | 5.86  | 5.91  | 5.88  | 0.235 |
| hsa-miR-637_st         | -0.063 | 2.58E-01 | 0.834 | 5.87  | 5.93  | 5.90  | 0.274 |
| hsa-miR-1910_st        | -0.132 | 2.59E-01 | 0.834 | 7.13  | 7.27  | 7.20  | 0.577 |
| hsa-miR-138_st         | -0.102 | 2.59E-01 | 0.834 | 5.97  | 6.08  | 6.02  | 0.445 |
| hsa-miR-7-2-star_st    | 0.018  | 2.59E-01 | 0.834 | 5.59  | 5.57  | 5.58  | 0.079 |
| hsa-miR-514_st         | 0.013  | 2.59E-01 | 0.834 | 5.31  | 5.30  | 5.30  | 0.054 |
| hsa-miR-762_st         | -0.130 | 2.60E-01 | 0.835 | 12.38 | 12.51 | 12.44 | 0.571 |
| hsa-miR-1180_st        | -0.076 | 2.62E-01 | 0.837 | 6.36  | 6.44  | 6.40  | 0.335 |
| hp_hsa-mir-374a_st     | -0.012 | 2.62E-01 | 0.837 | 5.29  | 5.30  | 5.29  | 0.050 |
| hsa-miR-9-star_st      | -0.019 | 2.62E-01 | 0.837 | 5.45  | 5.47  | 5.46  | 0.083 |
| hsa-miR-17_st          | -0.180 | 2.63E-01 | 0.837 | 11.65 | 11.83 | 11.74 | 0.795 |
| hp_hsa-mir-548f-5_st   | -0.012 | 2.63E-01 | 0.837 | 5.35  | 5.36  | 5.35  | 0.050 |
| hp_hsa-mir-153-1_st    | 0.012  | 2.63E-01 | 0.837 | 5.33  | 5.32  | 5.33  | 0.052 |
| hp_hsa-mir-9-2_st      | -0.012 | 2.63E-01 | 0.837 | 5.26  | 5.27  | 5.26  | 0.054 |
| hp_hsa-mir-92a-1_st    | 0.018  | 2.64E-01 | 0.838 | 5.42  | 5.40  | 5.41  | 0.081 |

|                        |        |          |       |       |       |       |       |
|------------------------|--------|----------|-------|-------|-------|-------|-------|
| hsa-miR-718_st         | -0.025 | 2.65E-01 | 0.838 | 5.59  | 5.61  | 5.60  | 0.113 |
| hsa-miR-920_st         | -0.028 | 2.65E-01 | 0.838 | 5.76  | 5.78  | 5.77  | 0.123 |
| hsa-miR-543_st         | 0.025  | 2.65E-01 | 0.838 | 5.48  | 5.45  | 5.47  | 0.111 |
| hsa-miR-744-star_st    | -0.015 | 2.66E-01 | 0.838 | 5.39  | 5.40  | 5.39  | 0.066 |
| hp_hsa-let-7b_x_st     | 0.016  | 2.66E-01 | 0.838 | 6.30  | 6.29  | 6.30  | 0.069 |
| hsa-miR-500-star_st    | -0.081 | 2.66E-01 | 0.838 | 7.30  | 7.38  | 7.34  | 0.358 |
| hsa-miR-1293_st        | 0.015  | 2.67E-01 | 0.838 | 5.50  | 5.49  | 5.50  | 0.065 |
| hsa-miR-26a_st         | 0.092  | 2.67E-01 | 0.838 | 12.97 | 12.87 | 12.92 | 0.412 |
| hsa-miR-214-star_st    | 0.094  | 2.68E-01 | 0.838 | 6.39  | 6.29  | 6.34  | 0.420 |
| hsa-miR-1297_st        | 0.014  | 2.68E-01 | 0.838 | 5.32  | 5.31  | 5.32  | 0.062 |
| hp_hsa-mir-548f-2_st   | 0.012  | 2.68E-01 | 0.838 | 5.41  | 5.40  | 5.41  | 0.053 |
| hsa-miR-15b_st         | 0.132  | 2.69E-01 | 0.838 | 8.36  | 8.23  | 8.30  | 0.589 |
| hp_hsa-mir-3194_st     | -0.035 | 2.69E-01 | 0.839 | 6.15  | 6.18  | 6.16  | 0.157 |
| hp_hsa-mir-147b_x_st   | -0.011 | 2.70E-01 | 0.841 | 5.35  | 5.37  | 5.36  | 0.049 |
| hsa-miR-519e-star_st   | -0.017 | 2.71E-01 | 0.842 | 5.41  | 5.43  | 5.42  | 0.074 |
| hp_hsa-mir-1302-8_st   | -0.012 | 2.72E-01 | 0.844 | 5.34  | 5.35  | 5.34  | 0.053 |
| hp_hsa-mir-558_st      | 0.010  | 2.72E-01 | 0.844 | 5.33  | 5.32  | 5.33  | 0.045 |
| hp_hsa-mir-4291_st     | 0.026  | 2.75E-01 | 0.848 | 5.86  | 5.83  | 5.85  | 0.119 |
| hsa-miR-1257_st        | -0.016 | 2.75E-01 | 0.848 | 5.39  | 5.40  | 5.40  | 0.070 |
| hsa-miR-1226_st        | -0.017 | 2.75E-01 | 0.848 | 5.45  | 5.46  | 5.45  | 0.074 |
| hsa-miR-1322_st        | 0.012  | 2.76E-01 | 0.848 | 5.33  | 5.32  | 5.32  | 0.055 |
| hp_hsa-mir-3180-1_s_st | -0.067 | 2.76E-01 | 0.848 | 6.89  | 6.96  | 6.92  | 0.301 |
| hp_hsa-mir-215_st      | -0.012 | 2.76E-01 | 0.849 | 5.35  | 5.37  | 5.36  | 0.052 |
| hp_hsa-mir-548q_x_st   | -0.031 | 2.78E-01 | 0.850 | 5.71  | 5.74  | 5.72  | 0.140 |
| hp_hsa-mir-302e_st     | -0.011 | 2.78E-01 | 0.850 | 5.31  | 5.32  | 5.32  | 0.051 |
| hp_hsa-mir-1253_st     | 0.012  | 2.79E-01 | 0.850 | 5.41  | 5.40  | 5.41  | 0.052 |
| hp_hsa-mir-431_st      | -0.013 | 2.79E-01 | 0.850 | 5.34  | 5.35  | 5.35  | 0.059 |
| hp_hsa-mir-3074_s_st   | -0.008 | 2.79E-01 | 0.850 | 5.33  | 5.34  | 5.34  | 0.037 |
| hp_hsa-mir-514-2_s_st  | 0.010  | 2.80E-01 | 0.852 | 5.34  | 5.33  | 5.34  | 0.045 |
| hp_hsa-mir-1914_st     | -0.037 | 2.81E-01 | 0.854 | 6.03  | 6.07  | 6.05  | 0.171 |
| hp_hsa-mir-23b_st      | 0.023  | 2.81E-01 | 0.854 | 5.85  | 5.82  | 5.83  | 0.105 |
| hp_hsa-mir-18a_x_st    | -0.047 | 2.83E-01 | 0.858 | 5.86  | 5.91  | 5.88  | 0.218 |
| hp_hsa-mir-636_st      | -0.026 | 2.83E-01 | 0.858 | 5.67  | 5.70  | 5.68  | 0.119 |
| hsa-miR-181a-star_st   | 0.037  | 2.84E-01 | 0.858 | 5.68  | 5.64  | 5.66  | 0.170 |
| hsa-miR-526a_st        | -0.015 | 2.85E-01 | 0.862 | 5.36  | 5.37  | 5.36  | 0.069 |
| hp_hsa-mir-4282_st     | 0.012  | 2.86E-01 | 0.862 | 5.44  | 5.42  | 5.43  | 0.056 |
| hp_hsa-mir-136_st      | -0.009 | 2.87E-01 | 0.863 | 5.30  | 5.31  | 5.30  | 0.043 |
| hsa-miR-1193_st        | -0.035 | 2.87E-01 | 0.863 | 5.84  | 5.88  | 5.86  | 0.164 |
| hp_hsa-mir-1908_st     | -0.038 | 2.88E-01 | 0.863 | 6.77  | 6.81  | 6.79  | 0.175 |
| hp_hsa-mir-760_st      | -0.023 | 2.88E-01 | 0.863 | 5.76  | 5.79  | 5.77  | 0.109 |
| hp_hsa-mir-2276_st     | -0.014 | 2.89E-01 | 0.863 | 5.60  | 5.61  | 5.61  | 0.062 |
| hp_hsa-mir-3159_st     | -0.054 | 2.91E-01 | 0.863 | 6.60  | 6.65  | 6.63  | 0.251 |
| hsa-miR-220b_st        | -0.013 | 2.91E-01 | 0.863 | 5.39  | 5.40  | 5.40  | 0.062 |
| hsa-miR-96-star_st     | 0.011  | 2.91E-01 | 0.863 | 5.36  | 5.35  | 5.35  | 0.051 |
| hp_hsa-mir-105-2_s_st  | -0.017 | 2.92E-01 | 0.863 | 5.36  | 5.38  | 5.37  | 0.078 |
| hp_hsa-mir-888_st      | -0.012 | 2.92E-01 | 0.863 | 5.29  | 5.30  | 5.30  | 0.055 |
| hsa-miR-28-5p_st       | 0.101  | 2.93E-01 | 0.863 | 8.71  | 8.61  | 8.66  | 0.473 |

|                        |        |          |       |       |       |       |       |
|------------------------|--------|----------|-------|-------|-------|-------|-------|
| hsa-miR-202-star_st    | -0.026 | 2.94E-01 | 0.863 | 5.52  | 5.54  | 5.53  | 0.121 |
| hsa-miR-544b_st        | 0.011  | 2.94E-01 | 0.863 | 5.30  | 5.29  | 5.30  | 0.051 |
| hsa-miR-520g_st        | 0.012  | 2.94E-01 | 0.863 | 5.32  | 5.31  | 5.32  | 0.056 |
| hp_hsa-mir-181b-1_st   | 0.012  | 2.95E-01 | 0.863 | 5.43  | 5.42  | 5.42  | 0.057 |
| hp_hsa-mir-323_st      | -0.018 | 2.95E-01 | 0.863 | 5.52  | 5.54  | 5.53  | 0.082 |
| hsa-miR-3184_st        | -0.022 | 2.95E-01 | 0.863 | 5.46  | 5.48  | 5.47  | 0.105 |
| hsa-miR-708_st         | 0.120  | 2.95E-01 | 0.863 | 7.73  | 7.61  | 7.67  | 0.565 |
| hsa-miR-517b_st        | 0.011  | 2.96E-01 | 0.863 | 5.31  | 5.29  | 5.30  | 0.050 |
| hp_hsa-mir-372_st      | -0.014 | 2.96E-01 | 0.863 | 5.38  | 5.39  | 5.38  | 0.068 |
| hsa-miR-190_st         | -0.012 | 2.96E-01 | 0.863 | 5.30  | 5.31  | 5.31  | 0.057 |
| hsa-miR-891a_st        | -0.013 | 2.96E-01 | 0.863 | 5.40  | 5.41  | 5.41  | 0.062 |
| hp_hsa-mir-4316_st     | 0.018  | 2.97E-01 | 0.863 | 5.56  | 5.54  | 5.55  | 0.084 |
| hsa-miR-301b_st        | 0.011  | 2.97E-01 | 0.863 | 5.29  | 5.28  | 5.29  | 0.053 |
| hsa-miR-4310_st        | 0.037  | 2.97E-01 | 0.863 | 5.82  | 5.78  | 5.80  | 0.175 |
| hp_hsa-mir-1292_st     | 0.017  | 2.97E-01 | 0.863 | 5.55  | 5.54  | 5.54  | 0.078 |
| hp_hsa-let-7f-2_st     | -0.011 | 2.97E-01 | 0.863 | 5.34  | 5.35  | 5.34  | 0.050 |
| hsa-miR-30d_st         | 0.102  | 2.97E-01 | 0.863 | 8.11  | 8.00  | 8.06  | 0.485 |
| hp_hsa-mir-564_st      | -0.037 | 2.98E-01 | 0.863 | 6.18  | 6.22  | 6.20  | 0.176 |
| hsa-miR-601_st         | 0.021  | 2.98E-01 | 0.863 | 5.36  | 5.34  | 5.35  | 0.099 |
| hsa-miR-23b_st         | 0.118  | 2.98E-01 | 0.863 | 12.66 | 12.54 | 12.60 | 0.560 |
| hsa-miR-4318_st        | 0.013  | 2.99E-01 | 0.863 | 5.38  | 5.37  | 5.37  | 0.059 |
| hsa-miR-103_st         | -0.078 | 3.00E-01 | 0.865 | 12.35 | 12.43 | 12.39 | 0.371 |
| hp_hsa-mir-147_x_st    | 0.013  | 3.00E-01 | 0.865 | 5.43  | 5.41  | 5.42  | 0.062 |
| hsa-miR-1184_st        | 0.061  | 3.01E-01 | 0.865 | 6.31  | 6.24  | 6.28  | 0.293 |
| hp_hsa-mir-1271_st     | 0.015  | 3.01E-01 | 0.865 | 5.53  | 5.51  | 5.52  | 0.072 |
| hp_hsa-mir-548s_st     | 0.011  | 3.01E-01 | 0.865 | 5.41  | 5.40  | 5.41  | 0.053 |
| hsa-miR-520e_st        | 0.011  | 3.02E-01 | 0.865 | 5.32  | 5.30  | 5.31  | 0.052 |
| hp_hsa-mir-1288_st     | 0.012  | 3.02E-01 | 0.866 | 5.37  | 5.36  | 5.37  | 0.055 |
| hp_hsa-mir-1289-1_st   | -0.030 | 3.04E-01 | 0.866 | 5.80  | 5.83  | 5.81  | 0.142 |
| hsa-miR-4251_st        | 0.012  | 3.04E-01 | 0.866 | 5.35  | 5.34  | 5.35  | 0.058 |
| hsa-miR-148b_st        | 0.047  | 3.04E-01 | 0.866 | 5.68  | 5.63  | 5.65  | 0.226 |
| hp_hsa-mir-4255_st     | -0.012 | 3.04E-01 | 0.866 | 5.37  | 5.38  | 5.37  | 0.055 |
| hp_hsa-mir-4288_st     | -0.010 | 3.05E-01 | 0.866 | 5.37  | 5.38  | 5.37  | 0.049 |
| hsa-miR-512-5p_st      | -0.012 | 3.05E-01 | 0.866 | 5.33  | 5.34  | 5.34  | 0.059 |
| hsa-miR-186_st         | -0.014 | 3.05E-01 | 0.866 | 5.32  | 5.34  | 5.33  | 0.065 |
| hp_hsa-mir-3180-3_s_st | -0.062 | 3.05E-01 | 0.866 | 6.76  | 6.82  | 6.79  | 0.300 |
| hp_hsa-mir-16-1_st     | -0.014 | 3.07E-01 | 0.869 | 5.33  | 5.34  | 5.33  | 0.065 |
| hsa-miR-525-5p_st      | -0.012 | 3.07E-01 | 0.869 | 5.35  | 5.36  | 5.36  | 0.059 |
| hsa-miR-576-3p_st      | 0.011  | 3.08E-01 | 0.870 | 5.36  | 5.35  | 5.35  | 0.052 |
| hsa-miR-561_st         | 0.016  | 3.09E-01 | 0.870 | 5.44  | 5.43  | 5.44  | 0.078 |
| hsa-miR-548c-5p_st     | 0.013  | 3.09E-01 | 0.870 | 5.44  | 5.43  | 5.43  | 0.064 |
| hsa-miR-4329_st        | 0.022  | 3.09E-01 | 0.870 | 5.52  | 5.49  | 5.50  | 0.106 |
| hp_hsa-mir-516b-1_x_st | 0.011  | 3.10E-01 | 0.872 | 5.38  | 5.36  | 5.37  | 0.052 |
| hsa-miR-125b-2-star_st | 0.063  | 3.11E-01 | 0.873 | 5.85  | 5.79  | 5.82  | 0.306 |
| hsa-miR-3115_st        | -0.013 | 3.11E-01 | 0.873 | 5.35  | 5.37  | 5.36  | 0.061 |
| hsa-miR-488-star_st    | -0.017 | 3.12E-01 | 0.873 | 5.50  | 5.51  | 5.50  | 0.081 |
| hp_hsa-mir-1281_st     | -0.033 | 3.13E-01 | 0.873 | 5.85  | 5.88  | 5.86  | 0.163 |

|                        |        |          |       |      |      |      |       |
|------------------------|--------|----------|-------|------|------|------|-------|
| hp_hsa-mir-296_st      | 0.018  | 3.13E-01 | 0.873 | 5.61 | 5.60 | 5.61 | 0.086 |
| hsa-miR-596_st         | -0.031 | 3.13E-01 | 0.873 | 5.56 | 5.60 | 5.58 | 0.150 |
| hp_hsa-mir-519b_x_st   | 0.010  | 3.13E-01 | 0.873 | 5.39 | 5.38 | 5.38 | 0.050 |
| hp_hsa-mir-600_st      | -0.013 | 3.14E-01 | 0.873 | 5.40 | 5.41 | 5.40 | 0.065 |
| hsa-miR-224-star_st    | 0.099  | 3.14E-01 | 0.873 | 6.71 | 6.62 | 6.67 | 0.486 |
| hp_hsa-mir-34a_st      | -0.021 | 3.14E-01 | 0.873 | 5.79 | 5.81 | 5.80 | 0.102 |
| hp_hsa-mir-1244-1_s_st | 0.009  | 3.15E-01 | 0.873 | 5.37 | 5.36 | 5.36 | 0.045 |
| hsa-miR-422a_st        | -0.118 | 3.15E-01 | 0.873 | 7.64 | 7.76 | 7.70 | 0.578 |
| hsa-miR-449b-star_st   | -0.031 | 3.16E-01 | 0.873 | 5.74 | 5.77 | 5.76 | 0.154 |
| hp_hsa-mir-662_st      | 0.018  | 3.16E-01 | 0.873 | 5.65 | 5.63 | 5.64 | 0.087 |
| hp_hsa-mir-3119-2_s_st | -0.013 | 3.18E-01 | 0.873 | 5.35 | 5.36 | 5.36 | 0.066 |
| hsa-miR-608_st         | 0.018  | 3.18E-01 | 0.873 | 5.48 | 5.46 | 5.47 | 0.089 |
| hp_hsa-mir-4300_st     | 0.012  | 3.19E-01 | 0.873 | 5.54 | 5.53 | 5.54 | 0.059 |
| hp_hsa-mir-423_s_st    | -0.046 | 3.19E-01 | 0.873 | 7.47 | 7.51 | 7.49 | 0.228 |
| hp_hsa-mir-937_st      | -0.032 | 3.19E-01 | 0.873 | 6.07 | 6.10 | 6.08 | 0.159 |
| hsa-miR-4276_st        | 0.010  | 3.19E-01 | 0.873 | 5.34 | 5.33 | 5.34 | 0.050 |
| hp_hsa-mir-3200_st     | -0.016 | 3.20E-01 | 0.873 | 5.46 | 5.48 | 5.47 | 0.078 |
| hsa-miR-628-3p_st      | 0.029  | 3.20E-01 | 0.873 | 5.76 | 5.73 | 5.75 | 0.144 |
| hsa-let-7a-star_st     | 0.011  | 3.20E-01 | 0.873 | 5.37 | 5.36 | 5.37 | 0.055 |
| hp_hsa-mir-96_st       | -0.011 | 3.20E-01 | 0.873 | 5.34 | 5.35 | 5.35 | 0.053 |
| hp_hsa-mir-587_x_st    | 0.010  | 3.20E-01 | 0.873 | 5.45 | 5.44 | 5.44 | 0.048 |
| hp_hsa-mir-520d_x_st   | 0.012  | 3.21E-01 | 0.873 | 5.37 | 5.35 | 5.36 | 0.058 |
| hp_hsa-mir-518a-1_x_st | -0.012 | 3.21E-01 | 0.873 | 5.38 | 5.39 | 5.38 | 0.060 |
| hp_hsa-mir-146a_st     | 0.015  | 3.22E-01 | 0.874 | 5.48 | 5.46 | 5.47 | 0.075 |
| hp_hsa-mir-181a-1_st   | -0.010 | 3.22E-01 | 0.874 | 5.32 | 5.33 | 5.32 | 0.048 |
| hsa-miR-4320_st        | 0.010  | 3.23E-01 | 0.874 | 5.34 | 5.33 | 5.34 | 0.050 |
| hsa-miR-590-3p_st      | -0.011 | 3.24E-01 | 0.876 | 5.28 | 5.29 | 5.29 | 0.056 |
| hp_hsa-mir-556_st      | -0.015 | 3.25E-01 | 0.876 | 5.43 | 5.45 | 5.44 | 0.073 |
| hp_hsa-mir-3118-2_x_st | 0.022  | 3.25E-01 | 0.876 | 5.32 | 5.30 | 5.31 | 0.110 |
| hp_hsa-mir-1295_st     | -0.014 | 3.26E-01 | 0.876 | 5.38 | 5.39 | 5.38 | 0.071 |
| hp_hsa-mir-3151_st     | -0.013 | 3.27E-01 | 0.876 | 5.47 | 5.48 | 5.47 | 0.066 |
| hp_hsa-mir-892a_x_st   | -0.010 | 3.27E-01 | 0.876 | 5.44 | 5.45 | 5.44 | 0.050 |
| hp_hsa-mir-1827_x_st   | -0.013 | 3.27E-01 | 0.876 | 5.42 | 5.43 | 5.42 | 0.067 |
| hp_hsa-mir-650_st      | -0.033 | 3.27E-01 | 0.876 | 5.68 | 5.71 | 5.69 | 0.165 |
| hsa-miR-585_st         | 0.010  | 3.28E-01 | 0.876 | 5.32 | 5.31 | 5.31 | 0.052 |
| hp_hsa-mir-124-1_st    | -0.012 | 3.28E-01 | 0.876 | 5.37 | 5.38 | 5.37 | 0.059 |
| hsa-miR-1912_st        | -0.010 | 3.29E-01 | 0.876 | 5.32 | 5.33 | 5.32 | 0.052 |
| hsa-miR-339-3p_st      | -0.082 | 3.29E-01 | 0.876 | 7.32 | 7.40 | 7.36 | 0.415 |
| hsa-miR-1202_st        | -0.178 | 3.29E-01 | 0.876 | 7.79 | 7.97 | 7.88 | 0.902 |
| hsa-miR-539_st         | 0.011  | 3.29E-01 | 0.876 | 5.37 | 5.36 | 5.37 | 0.054 |
| hp_hsa-let-7c_st       | 0.012  | 3.29E-01 | 0.876 | 5.37 | 5.35 | 5.36 | 0.059 |
| hp_hsa-mir-3142_x_st   | -0.010 | 3.30E-01 | 0.876 | 5.42 | 5.43 | 5.42 | 0.050 |
| hp_hsa-mir-3139_st     | -0.012 | 3.30E-01 | 0.876 | 5.42 | 5.43 | 5.42 | 0.059 |
| hsa-miR-598_st         | 0.011  | 3.31E-01 | 0.876 | 5.32 | 5.31 | 5.31 | 0.056 |
| hsa-miR-519e_st        | 0.012  | 3.32E-01 | 0.878 | 5.35 | 5.34 | 5.35 | 0.059 |
| hp_hsa-mir-509-1_s_st  | 0.022  | 3.33E-01 | 0.878 | 5.38 | 5.36 | 5.37 | 0.112 |
| hsa-miR-527_st         | -0.011 | 3.33E-01 | 0.878 | 5.35 | 5.36 | 5.36 | 0.055 |

|                        |        |          |       |       |       |       |       |
|------------------------|--------|----------|-------|-------|-------|-------|-------|
| hsa-miR-4312_st        | -0.020 | 3.34E-01 | 0.878 | 5.60  | 5.62  | 5.61  | 0.100 |
| hp_hsa-mir-3193_st     | -0.015 | 3.34E-01 | 0.878 | 5.49  | 5.50  | 5.50  | 0.075 |
| hsa-miR-323-3p_st      | 0.011  | 3.34E-01 | 0.878 | 5.43  | 5.42  | 5.43  | 0.056 |
| hp_hsa-mir-1283-2_x_st | -0.010 | 3.35E-01 | 0.878 | 5.35  | 5.36  | 5.36  | 0.052 |
| hp_hsa-mir-509-2_s_st  | 0.022  | 3.35E-01 | 0.878 | 5.43  | 5.41  | 5.42  | 0.114 |
| hp_hsa-mir-548a-3_st   | -0.014 | 3.35E-01 | 0.878 | 5.42  | 5.44  | 5.43  | 0.069 |
| hp_hsa-mir-371_st      | -0.020 | 3.35E-01 | 0.878 | 5.53  | 5.55  | 5.54  | 0.104 |
| hp_hsa-mir-514b_st     | 0.013  | 3.36E-01 | 0.878 | 5.48  | 5.47  | 5.47  | 0.065 |
| hp_hsa-mir-935_st      | -0.049 | 3.37E-01 | 0.880 | 5.99  | 6.04  | 6.01  | 0.252 |
| hsa-miR-615-3p_st      | 0.040  | 3.37E-01 | 0.880 | 5.79  | 5.75  | 5.77  | 0.205 |
| hp_hsa-mir-589_st      | -0.013 | 3.38E-01 | 0.880 | 5.46  | 5.47  | 5.46  | 0.067 |
| hp_hsa-mir-588_st      | 0.010  | 3.38E-01 | 0.880 | 5.35  | 5.34  | 5.35  | 0.051 |
| hsa-miR-129-star_st    | -0.016 | 3.38E-01 | 0.880 | 5.47  | 5.48  | 5.48  | 0.083 |
| hp_hsa-mir-579_x_st    | -0.010 | 3.39E-01 | 0.881 | 5.34  | 5.35  | 5.34  | 0.051 |
| hsa-miR-525-3p_st      | 0.011  | 3.40E-01 | 0.882 | 5.31  | 5.30  | 5.31  | 0.054 |
| hsa-miR-149-star_st    | -0.108 | 3.40E-01 | 0.882 | 12.19 | 12.30 | 12.25 | 0.559 |
| hsa-miR-423-5p_st      | -0.091 | 3.41E-01 | 0.882 | 9.06  | 9.15  | 9.10  | 0.471 |
| hsa-miR-548g_st        | -0.011 | 3.41E-01 | 0.882 | 5.29  | 5.30  | 5.29  | 0.057 |
| hsa-miR-181c-star_st   | -0.035 | 3.42E-01 | 0.882 | 5.65  | 5.69  | 5.67  | 0.182 |
| hp_hsa-mir-126_st      | 0.022  | 3.42E-01 | 0.882 | 6.17  | 6.15  | 6.16  | 0.116 |
| hsa-miR-1909-star_st   | -0.073 | 3.43E-01 | 0.883 | 6.33  | 6.41  | 6.37  | 0.381 |
| hsa-miR-146a-star_st   | 0.010  | 3.45E-01 | 0.887 | 5.31  | 5.30  | 5.31  | 0.052 |
| hsa-miR-646_st         | 0.013  | 3.46E-01 | 0.888 | 5.36  | 5.35  | 5.36  | 0.067 |
| hsa-let-7e-star_st     | 0.015  | 3.46E-01 | 0.888 | 5.40  | 5.38  | 5.39  | 0.079 |
| hp_hsa-mir-3117_st     | -0.025 | 3.46E-01 | 0.888 | 5.58  | 5.61  | 5.60  | 0.130 |
| hp_hsa-mir-523_x_st    | 0.009  | 3.47E-01 | 0.888 | 5.30  | 5.29  | 5.30  | 0.049 |
| hp_hsa-mir-495_st      | 0.010  | 3.48E-01 | 0.888 | 5.32  | 5.31  | 5.32  | 0.052 |
| hp_hsa-mir-1302-6_st   | -0.011 | 3.49E-01 | 0.888 | 5.31  | 5.32  | 5.32  | 0.058 |
| hp_hsa-mir-3134_st     | -0.010 | 3.49E-01 | 0.888 | 5.32  | 5.33  | 5.32  | 0.051 |
| hp_hsa-mir-186_st      | 0.008  | 3.51E-01 | 0.888 | 5.32  | 5.31  | 5.32  | 0.042 |
| hsa-miR-32_st          | -0.025 | 3.51E-01 | 0.888 | 5.52  | 5.55  | 5.53  | 0.129 |
| hp_hsa-mir-1225_st     | -0.018 | 3.52E-01 | 0.888 | 5.61  | 5.63  | 5.62  | 0.095 |
| hp_hsa-mir-320d-1_x_st | 0.018  | 3.52E-01 | 0.888 | 5.52  | 5.50  | 5.51  | 0.095 |
| hp_hsa-mir-1324_st     | -0.014 | 3.52E-01 | 0.888 | 5.46  | 5.47  | 5.46  | 0.072 |
| hp_hsa-mir-627_st      | -0.011 | 3.52E-01 | 0.888 | 5.38  | 5.40  | 5.39  | 0.059 |
| hp_hsa-mir-526b_x_st   | -0.014 | 3.53E-01 | 0.888 | 5.46  | 5.47  | 5.46  | 0.073 |
| hp_hsa-mir-19b-2_st    | 0.013  | 3.53E-01 | 0.888 | 5.42  | 5.41  | 5.41  | 0.070 |
| hsa-miR-619_st         | -0.012 | 3.53E-01 | 0.888 | 5.36  | 5.37  | 5.37  | 0.064 |
| hp_hsa-mir-608_st      | -0.012 | 3.53E-01 | 0.888 | 5.48  | 5.49  | 5.48  | 0.063 |
| hsa-miR-597_st         | 0.014  | 3.53E-01 | 0.888 | 5.44  | 5.43  | 5.44  | 0.074 |
| hp_hsa-mir-4251_st     | -0.023 | 3.54E-01 | 0.888 | 5.69  | 5.71  | 5.70  | 0.123 |
| hsa-miR-1261_st        | -0.013 | 3.54E-01 | 0.888 | 5.37  | 5.38  | 5.38  | 0.067 |
| hp_hsa-mir-1305_st     | -0.016 | 3.55E-01 | 0.888 | 5.50  | 5.52  | 5.51  | 0.085 |
| hp_hsa-mir-744_st      | -0.017 | 3.55E-01 | 0.888 | 5.61  | 5.63  | 5.62  | 0.089 |
| hp_hsa-mir-1207_st     | -0.016 | 3.55E-01 | 0.888 | 5.57  | 5.58  | 5.58  | 0.087 |
| hp_hsa-mir-599_st      | 0.012  | 3.56E-01 | 0.888 | 5.43  | 5.42  | 5.42  | 0.066 |
| hp_hsa-mir-3187_st     | 0.017  | 3.56E-01 | 0.888 | 5.59  | 5.57  | 5.58  | 0.090 |

|                        |        |          |       |      |      |      |       |
|------------------------|--------|----------|-------|------|------|------|-------|
| hp_hsa-mir-4315-1_s_st | -0.022 | 3.56E-01 | 0.888 | 5.75 | 5.77 | 5.76 | 0.118 |
| hp_hsa-mir-3191_s_st   | -0.022 | 3.56E-01 | 0.888 | 5.78 | 5.81 | 5.80 | 0.120 |
| hsa-miR-548h_st        | -0.011 | 3.57E-01 | 0.888 | 5.38 | 5.39 | 5.38 | 0.057 |
| hp_hsa-mir-4266_st     | -0.014 | 3.57E-01 | 0.888 | 5.46 | 5.47 | 5.46 | 0.073 |
| hsa-miR-4264_st        | -0.011 | 3.58E-01 | 0.888 | 5.31 | 5.32 | 5.32 | 0.059 |
| hsa-miR-122-star_st    | -0.013 | 3.58E-01 | 0.888 | 5.36 | 5.37 | 5.36 | 0.070 |
| hp_hsa-mir-607_st      | 0.021  | 3.58E-01 | 0.888 | 5.88 | 5.86 | 5.87 | 0.111 |
| hp_hsa-mir-3130-3_s_st | 0.011  | 3.59E-01 | 0.888 | 5.42 | 5.41 | 5.42 | 0.057 |
| hsa-miR-30d-star_st    | -0.012 | 3.59E-01 | 0.888 | 5.31 | 5.32 | 5.31 | 0.063 |
| hsa-miR-1266_st        | -0.017 | 3.59E-01 | 0.888 | 5.62 | 5.64 | 5.63 | 0.090 |
| hp_hsa-mir-3142_st     | -0.011 | 3.60E-01 | 0.888 | 5.34 | 5.35 | 5.35 | 0.059 |
| hp_hsa-mir-653_st      | -0.010 | 3.60E-01 | 0.888 | 5.33 | 5.34 | 5.33 | 0.054 |
| hp_hsa-mir-2053_st     | -0.009 | 3.60E-01 | 0.888 | 5.30 | 5.31 | 5.31 | 0.045 |
| hp_hsa-mir-3118-5_x_st | -0.012 | 3.61E-01 | 0.888 | 5.30 | 5.31 | 5.31 | 0.065 |
| hsa-miR-574-5p_st      | 0.066  | 3.63E-01 | 0.888 | 7.12 | 7.05 | 7.09 | 0.357 |
| hp_hsa-mir-1267_st     | -0.011 | 3.63E-01 | 0.888 | 5.43 | 5.44 | 5.43 | 0.057 |
| hsa-miR-503_st         | 0.094  | 3.63E-01 | 0.888 | 6.59 | 6.50 | 6.55 | 0.510 |
| hsa-miR-1249_st        | -0.018 | 3.64E-01 | 0.888 | 5.57 | 5.59 | 5.58 | 0.095 |
| hsa-miR-1286_st        | -0.012 | 3.65E-01 | 0.888 | 5.39 | 5.40 | 5.39 | 0.063 |
| hp_hsa-mir-874_st      | 0.023  | 3.65E-01 | 0.888 | 5.99 | 5.97 | 5.98 | 0.124 |
| hsa-miR-4311_st        | -0.021 | 3.66E-01 | 0.888 | 5.46 | 5.48 | 5.47 | 0.115 |
| hsa-miR-196a_st        | -0.146 | 3.66E-01 | 0.888 | 7.08 | 7.22 | 7.15 | 0.799 |
| hp_hsa-mir-570_st      | 0.014  | 3.66E-01 | 0.888 | 5.46 | 5.44 | 5.45 | 0.076 |
| hp_hsa-mir-571_st      | 0.010  | 3.67E-01 | 0.888 | 5.43 | 5.42 | 5.43 | 0.056 |
| hp_hsa-mir-518f_x_st   | -0.012 | 3.68E-01 | 0.888 | 5.35 | 5.36 | 5.35 | 0.067 |
| hsa-miR-3165_st        | -0.012 | 3.68E-01 | 0.888 | 5.33 | 5.34 | 5.33 | 0.064 |
| hsa-miR-16-1-star_st   | -0.010 | 3.69E-01 | 0.888 | 5.34 | 5.35 | 5.35 | 0.057 |
| hsa-miR-328_st         | 0.029  | 3.69E-01 | 0.888 | 5.74 | 5.71 | 5.73 | 0.158 |
| hp_hsa-mir-4278_st     | -0.010 | 3.69E-01 | 0.888 | 5.40 | 5.41 | 5.40 | 0.055 |
| hsa-miR-3130-3p_st     | -0.015 | 3.69E-01 | 0.888 | 5.51 | 5.52 | 5.51 | 0.080 |
| hp_hsa-mir-194-1_x_st  | -0.016 | 3.69E-01 | 0.888 | 5.91 | 5.93 | 5.92 | 0.089 |
| hp_hsa-mir-29b-1_x_st  | 0.011  | 3.70E-01 | 0.888 | 5.36 | 5.35 | 5.35 | 0.060 |
| hp_hsa-mir-2277_st     | -0.018 | 3.71E-01 | 0.888 | 5.70 | 5.71 | 5.71 | 0.100 |
| hp_hsa-mir-129-2_st    | 0.011  | 3.71E-01 | 0.888 | 5.50 | 5.49 | 5.49 | 0.062 |
| hp_hsa-mir-16-2_st     | -0.020 | 3.71E-01 | 0.888 | 5.56 | 5.58 | 5.57 | 0.110 |
| hp_hsa-mir-210_st      | -0.037 | 3.71E-01 | 0.888 | 6.40 | 6.43 | 6.41 | 0.201 |
| hp_hsa-mir-542_st      | 0.013  | 3.72E-01 | 0.888 | 5.49 | 5.47 | 5.48 | 0.070 |
| hp_hsa-mir-1231_st     | -0.016 | 3.72E-01 | 0.888 | 5.75 | 5.77 | 5.76 | 0.088 |
| hsa-miR-424_st         | -0.010 | 3.73E-01 | 0.888 | 5.27 | 5.28 | 5.28 | 0.055 |
| hp_hsa-mir-130a_st     | 0.013  | 3.73E-01 | 0.888 | 5.53 | 5.52 | 5.52 | 0.072 |
| hp_hsa-mir-3118-6_x_st | -0.011 | 3.73E-01 | 0.888 | 5.41 | 5.42 | 5.42 | 0.060 |
| hsa-miR-346_st         | -0.067 | 3.74E-01 | 0.888 | 6.45 | 6.51 | 6.48 | 0.369 |
| hsa-miR-3200_st        | -0.038 | 3.74E-01 | 0.888 | 5.54 | 5.58 | 5.56 | 0.208 |
| hsa-miR-2909_st        | -0.010 | 3.74E-01 | 0.888 | 5.39 | 5.41 | 5.40 | 0.057 |
| hp_hsa-mir-579_st      | 0.010  | 3.74E-01 | 0.888 | 5.41 | 5.40 | 5.41 | 0.055 |
| hsa-miR-2114-star_st   | -0.011 | 3.75E-01 | 0.888 | 5.33 | 5.34 | 5.34 | 0.063 |
| hp_hsa-mir-16-1_x_st   | 0.012  | 3.75E-01 | 0.888 | 5.81 | 5.80 | 5.80 | 0.065 |

|                        |        |          |       |       |       |       |       |
|------------------------|--------|----------|-------|-------|-------|-------|-------|
| hp_hsa-mir-501_st      | -0.021 | 3.76E-01 | 0.888 | 5.61  | 5.64  | 5.62  | 0.116 |
| hsa-miR-27b_st         | 0.127  | 3.77E-01 | 0.888 | 9.59  | 9.46  | 9.53  | 0.707 |
| hsa-miR-654-5p_st      | 0.022  | 3.77E-01 | 0.888 | 5.62  | 5.60  | 5.61  | 0.120 |
| hsa-miR-4274_st        | 0.024  | 3.77E-01 | 0.888 | 5.77  | 5.74  | 5.76  | 0.133 |
| hp_hsa-mir-559_st      | -0.013 | 3.77E-01 | 0.888 | 5.57  | 5.58  | 5.58  | 0.071 |
| hsa-miR-34b-star_st    | -0.014 | 3.77E-01 | 0.888 | 5.45  | 5.46  | 5.45  | 0.077 |
| hsa-miR-634_st         | 0.012  | 3.77E-01 | 0.888 | 5.41  | 5.40  | 5.41  | 0.065 |
| hp_hsa-mir-30e_x_st    | -0.045 | 3.78E-01 | 0.888 | 5.98  | 6.02  | 6.00  | 0.251 |
| hsa-miR-520h_st        | 0.010  | 3.78E-01 | 0.888 | 5.32  | 5.31  | 5.32  | 0.057 |
| hsa-miR-519a_st        | -0.011 | 3.78E-01 | 0.888 | 5.27  | 5.28  | 5.28  | 0.059 |
| hp_hsa-mir-661_st      | -0.020 | 3.79E-01 | 0.888 | 5.81  | 5.83  | 5.82  | 0.114 |
| hp_hsa-mir-143_st      | 0.053  | 3.79E-01 | 0.888 | 6.58  | 6.52  | 6.55  | 0.295 |
| hsa-miR-593-star_st    | 0.012  | 3.79E-01 | 0.888 | 5.39  | 5.38  | 5.39  | 0.064 |
| hsa-miR-143-star_st    | 0.122  | 3.80E-01 | 0.888 | 7.44  | 7.31  | 7.38  | 0.684 |
| hsa-miR-518b_st        | 0.010  | 3.80E-01 | 0.888 | 5.36  | 5.35  | 5.36  | 0.054 |
| hp_hsa-mir-373_st      | 0.011  | 3.80E-01 | 0.888 | 5.38  | 5.37  | 5.37  | 0.064 |
| hp_hsa-mir-513b_x_st   | -0.011 | 3.81E-01 | 0.890 | 5.41  | 5.42  | 5.41  | 0.063 |
| hsa-miR-3182_st        | -0.011 | 3.82E-01 | 0.890 | 5.25  | 5.26  | 5.26  | 0.061 |
| hp_hsa-mir-887_st      | -0.015 | 3.83E-01 | 0.890 | 5.59  | 5.60  | 5.59  | 0.083 |
| hp_hsa-mir-518e_st     | 0.010  | 3.83E-01 | 0.890 | 5.32  | 5.31  | 5.31  | 0.054 |
| hp_hsa-mir-4304_st     | -0.021 | 3.83E-01 | 0.890 | 5.57  | 5.59  | 5.58  | 0.118 |
| hp_hsa-mir-3126_st     | -0.010 | 3.84E-01 | 0.890 | 5.40  | 5.41  | 5.40  | 0.057 |
| hp_hsa-mir-548i-1_x_st | 0.009  | 3.84E-01 | 0.890 | 5.39  | 5.38  | 5.39  | 0.049 |
| hp_hsa-mir-106a_st     | -0.009 | 3.84E-01 | 0.890 | 5.29  | 5.30  | 5.29  | 0.049 |
| hsa-miR-34c-3p_st      | 0.022  | 3.86E-01 | 0.893 | 5.62  | 5.60  | 5.61  | 0.124 |
| hp_hsa-mir-141_st      | -0.019 | 3.86E-01 | 0.893 | 5.60  | 5.62  | 5.61  | 0.111 |
| hsa-miR-423-3p_st      | -0.075 | 3.87E-01 | 0.893 | 8.52  | 8.59  | 8.55  | 0.428 |
| hp_hsa-mir-892b_st     | -0.010 | 3.88E-01 | 0.893 | 5.36  | 5.37  | 5.37  | 0.059 |
| hp_hsa-mir-539_st      | 0.012  | 3.88E-01 | 0.893 | 5.38  | 5.37  | 5.38  | 0.068 |
| hsa-miR-218-1-star_st  | 0.011  | 3.89E-01 | 0.893 | 5.28  | 5.27  | 5.28  | 0.060 |
| hp_hsa-mir-214_st      | 0.016  | 3.89E-01 | 0.893 | 5.68  | 5.67  | 5.68  | 0.090 |
| hsa-miR-1183_st        | 0.040  | 3.90E-01 | 0.893 | 5.99  | 5.95  | 5.97  | 0.228 |
| hp_hsa-mir-29c_st      | 0.012  | 3.90E-01 | 0.893 | 5.34  | 5.33  | 5.33  | 0.068 |
| hsa-miR-891b_st        | -0.013 | 3.90E-01 | 0.893 | 5.49  | 5.50  | 5.50  | 0.075 |
| hsa-let-7b_st          | 0.040  | 3.90E-01 | 0.893 | 14.12 | 14.08 | 14.10 | 0.232 |
| hsa-miR-4323_st        | -0.011 | 3.90E-01 | 0.893 | 5.41  | 5.42  | 5.41  | 0.062 |
| hp_hsa-mir-4276_st     | 0.009  | 3.92E-01 | 0.895 | 5.48  | 5.47  | 5.48  | 0.054 |
| hp_hsa-mir-1294_st     | -0.011 | 3.92E-01 | 0.895 | 5.39  | 5.41  | 5.40  | 0.064 |
| hp_hsa-mir-3153_st     | 0.020  | 3.93E-01 | 0.895 | 5.69  | 5.67  | 5.68  | 0.116 |
| hsa-miR-221-star_st    | 0.025  | 3.94E-01 | 0.897 | 5.62  | 5.59  | 5.61  | 0.147 |
| hp_hsa-mir-548m_x_st   | 0.010  | 3.96E-01 | 0.897 | 5.41  | 5.40  | 5.40  | 0.058 |
| hsa-miR-1915_st        | -0.084 | 3.96E-01 | 0.897 | 12.95 | 13.03 | 12.99 | 0.491 |
| hp_hsa-mir-548x_st     | 0.014  | 3.97E-01 | 0.897 | 5.49  | 5.47  | 5.48  | 0.081 |
| hp_hsa-mir-3116-2_s_st | 0.010  | 3.97E-01 | 0.897 | 5.36  | 5.35  | 5.35  | 0.057 |
| hsa-miR-3188_st        | 0.095  | 3.97E-01 | 0.897 | 7.45  | 7.35  | 7.40  | 0.554 |
| hsa-miR-498_st         | -0.046 | 3.97E-01 | 0.897 | 5.95  | 6.00  | 5.98  | 0.267 |
| hp_hsa-mir-24-2_x_st   | 0.023  | 3.97E-01 | 0.897 | 6.93  | 6.91  | 6.92  | 0.135 |



|                        |        |          |       |      |      |      |       |
|------------------------|--------|----------|-------|------|------|------|-------|
| hsa-miR-759_st         | 0.011  | 3.97E-01 | 0.897 | 5.32 | 5.31 | 5.31 | 0.061 |
| hsa-miR-4263_st        | 0.011  | 3.97E-01 | 0.897 | 5.33 | 5.32 | 5.33 | 0.062 |
| hp_hsa-mir-514-3_s_st  | -0.010 | 3.98E-01 | 0.898 | 5.45 | 5.46 | 5.46 | 0.055 |
| hp_hsa-mir-30b_st      | 0.009  | 3.99E-01 | 0.898 | 5.46 | 5.45 | 5.46 | 0.053 |
| hp_hsa-mir-450b_st     | -0.010 | 3.99E-01 | 0.898 | 5.41 | 5.42 | 5.42 | 0.059 |
| hsa-miR-132-star_st    | 0.014  | 3.99E-01 | 0.898 | 5.32 | 5.31 | 5.32 | 0.083 |
| hp_hsa-mir-585_st      | 0.011  | 4.00E-01 | 0.898 | 5.40 | 5.39 | 5.40 | 0.064 |
| hp_hsa-mir-3198_st     | 0.013  | 4.01E-01 | 0.898 | 5.51 | 5.50 | 5.50 | 0.075 |
| hp_hsa-mir-601_st      | 0.011  | 4.01E-01 | 0.898 | 5.46 | 5.45 | 5.45 | 0.063 |
| hsa-miR-3132_st        | 0.016  | 4.01E-01 | 0.898 | 5.50 | 5.49 | 5.50 | 0.091 |
| hsa-miR-1203_st        | 0.011  | 4.02E-01 | 0.900 | 5.47 | 5.46 | 5.46 | 0.061 |
| hp_hsa-mir-572_st      | -0.070 | 4.03E-01 | 0.900 | 6.91 | 6.98 | 6.94 | 0.411 |
| hsa-miR-1324_st        | 0.009  | 4.04E-01 | 0.900 | 5.31 | 5.30 | 5.31 | 0.053 |
| hsa-miR-582-3p_st      | -0.010 | 4.04E-01 | 0.900 | 5.33 | 5.34 | 5.33 | 0.057 |
| hp_hsa-mir-1321_st     | 0.010  | 4.04E-01 | 0.900 | 5.56 | 5.55 | 5.55 | 0.060 |
| hsa-miR-1179_st        | 0.010  | 4.05E-01 | 0.900 | 5.35 | 5.34 | 5.35 | 0.060 |
| hp_hsa-mir-1278_st     | -0.011 | 4.05E-01 | 0.901 | 5.46 | 5.47 | 5.46 | 0.064 |
| hsa-miR-1272_st        | -0.033 | 4.05E-01 | 0.901 | 5.67 | 5.70 | 5.69 | 0.195 |
| hsa-miR-4292_st        | -0.027 | 4.06E-01 | 0.901 | 5.77 | 5.80 | 5.78 | 0.158 |
| hp_hsa-mir-4265_st     | -0.008 | 4.07E-01 | 0.902 | 5.39 | 5.40 | 5.39 | 0.048 |
| hp_hsa-mir-526a-2_x_st | 0.009  | 4.07E-01 | 0.902 | 5.39 | 5.38 | 5.39 | 0.052 |
| hp_hsa-mir-124-2_st    | -0.015 | 4.08E-01 | 0.903 | 5.50 | 5.52 | 5.51 | 0.088 |
| hp_hsa-mir-548w_st     | 0.011  | 4.09E-01 | 0.903 | 5.43 | 5.42 | 5.43 | 0.065 |
| hp_hsa-mir-27a_x_st    | 0.039  | 4.09E-01 | 0.903 | 6.14 | 6.10 | 6.12 | 0.230 |
| hsa-miR-30e_st         | 0.049  | 4.10E-01 | 0.903 | 6.10 | 6.05 | 6.08 | 0.294 |
| hp_hsa-mir-549_x_st    | 0.009  | 4.11E-01 | 0.904 | 5.34 | 5.33 | 5.34 | 0.055 |
| hsa-miR-943_st         | -0.046 | 4.11E-01 | 0.904 | 6.01 | 6.05 | 6.03 | 0.275 |
| hp_hsa-mir-1237_st     | -0.051 | 4.12E-01 | 0.904 | 6.71 | 6.76 | 6.73 | 0.306 |
| hp_hsa-mir-3129_x_st   | 0.009  | 4.12E-01 | 0.904 | 5.41 | 5.40 | 5.41 | 0.054 |
| hsa-miR-220c_st        | -0.009 | 4.12E-01 | 0.904 | 5.32 | 5.33 | 5.32 | 0.056 |
| hsa-miR-376b_st        | 0.009  | 4.12E-01 | 0.904 | 5.30 | 5.29 | 5.30 | 0.056 |
| hsa-miR-643_st         | 0.009  | 4.13E-01 | 0.905 | 5.29 | 5.28 | 5.28 | 0.053 |
| hsa-miR-502-3p_st      | -0.060 | 4.14E-01 | 0.905 | 7.47 | 7.53 | 7.50 | 0.365 |
| hsa-miR-628-5p_st      | -0.028 | 4.15E-01 | 0.905 | 5.74 | 5.77 | 5.76 | 0.172 |
| hsa-miR-1539_st        | -0.012 | 4.15E-01 | 0.905 | 5.50 | 5.51 | 5.51 | 0.073 |
| hsa-miR-323-5p_st      | -0.041 | 4.17E-01 | 0.905 | 5.61 | 5.65 | 5.63 | 0.250 |
| hp_hsa-mir-3155_x_st   | -0.015 | 4.17E-01 | 0.905 | 5.93 | 5.95 | 5.94 | 0.091 |
| hp_hsa-mir-641_x_st    | -0.010 | 4.17E-01 | 0.905 | 5.44 | 5.45 | 5.44 | 0.062 |
| hsa-miR-1298_st        | -0.010 | 4.17E-01 | 0.905 | 5.31 | 5.32 | 5.32 | 0.061 |
| hp_hsa-mir-320c-2_st   | 0.011  | 4.18E-01 | 0.905 | 5.40 | 5.38 | 5.39 | 0.067 |
| hsa-miR-3147_st        | 0.045  | 4.18E-01 | 0.905 | 6.35 | 6.31 | 6.33 | 0.274 |
| hsa-miR-1256_st        | -0.013 | 4.18E-01 | 0.905 | 5.37 | 5.38 | 5.37 | 0.076 |
| hp_hsa-mir-147_st      | -0.012 | 4.18E-01 | 0.905 | 5.42 | 5.43 | 5.43 | 0.073 |
| hp_hsa-mir-19b-1_st    | -0.009 | 4.18E-01 | 0.905 | 5.29 | 5.30 | 5.29 | 0.054 |
| hsa-miR-542-5p_st      | 0.031  | 4.19E-01 | 0.905 | 5.77 | 5.74 | 5.76 | 0.192 |
| hsa-miR-1290_st        | -0.127 | 4.19E-01 | 0.905 | 6.27 | 6.39 | 6.33 | 0.777 |
| hp_hsa-mir-376a-1_st   | 0.008  | 4.19E-01 | 0.905 | 5.30 | 5.30 | 5.30 | 0.047 |

|                          |        |          |       |      |      |      |       |
|--------------------------|--------|----------|-------|------|------|------|-------|
| hp_hsa-mir-130b_st       | -0.014 | 4.21E-01 | 0.907 | 5.84 | 5.85 | 5.85 | 0.084 |
| hsa-miR-4267_st          | 0.010  | 4.21E-01 | 0.907 | 5.46 | 5.45 | 5.45 | 0.061 |
| hsa-miR-942_st           | -0.009 | 4.23E-01 | 0.908 | 5.26 | 5.27 | 5.26 | 0.052 |
| hp_hsa-let-7a-2_x_st     | 0.010  | 4.23E-01 | 0.908 | 5.42 | 5.41 | 5.41 | 0.061 |
| hsa-miR-588_st           | 0.008  | 4.24E-01 | 0.908 | 5.35 | 5.34 | 5.35 | 0.048 |
| hsa-miR-330-3p_st        | -0.052 | 4.24E-01 | 0.908 | 6.45 | 6.50 | 6.48 | 0.321 |
| hp_hsa-mir-4283-1_s_st   | -0.010 | 4.24E-01 | 0.908 | 5.50 | 5.51 | 5.50 | 0.061 |
| hp_hsa-mir-711_st        | -0.034 | 4.25E-01 | 0.908 | 6.83 | 6.86 | 6.84 | 0.207 |
| hp_hsa-mir-938_st        | 0.008  | 4.25E-01 | 0.908 | 5.35 | 5.34 | 5.35 | 0.050 |
| hsa-miR-1321_st          | 0.013  | 4.26E-01 | 0.908 | 5.37 | 5.36 | 5.36 | 0.078 |
| hp_hsa-mir-561_st        | 0.011  | 4.27E-01 | 0.908 | 5.48 | 5.47 | 5.47 | 0.069 |
| hp_hsa-mir-767_st        | -0.010 | 4.27E-01 | 0.908 | 5.45 | 5.46 | 5.45 | 0.059 |
| hp_hsa-mir-548a-1_x_st   | 0.012  | 4.27E-01 | 0.908 | 5.48 | 5.47 | 5.47 | 0.073 |
| hp_hsa-mir-513c_x_st     | 0.010  | 4.27E-01 | 0.908 | 5.39 | 5.38 | 5.38 | 0.064 |
| hp_hsa-mir-4292_st       | 0.024  | 4.27E-01 | 0.908 | 5.88 | 5.86 | 5.87 | 0.147 |
| hsa-miR-485-3p_st        | 0.015  | 4.28E-01 | 0.908 | 5.58 | 5.57 | 5.58 | 0.094 |
| hp_hsa-mir-1972-2_s_st   | -0.010 | 4.28E-01 | 0.908 | 5.45 | 5.46 | 5.45 | 0.060 |
| hsa-miR-380_st           | -0.008 | 4.28E-01 | 0.908 | 5.31 | 5.32 | 5.31 | 0.050 |
| hp_hsa-mir-4299_st       | -0.010 | 4.29E-01 | 0.909 | 5.45 | 5.46 | 5.45 | 0.063 |
| hp_hsa-mir-103-1-as_s_st | 0.008  | 4.29E-01 | 0.909 | 5.34 | 5.33 | 5.33 | 0.049 |
| hp_hsa-mir-665_st        | 0.021  | 4.30E-01 | 0.910 | 6.15 | 6.13 | 6.14 | 0.132 |
| hsa-miR-501-3p_st        | -0.053 | 4.31E-01 | 0.910 | 6.82 | 6.87 | 6.85 | 0.331 |
| hp_hsa-mir-208a_st       | 0.008  | 4.32E-01 | 0.910 | 5.34 | 5.33 | 5.34 | 0.052 |
| hsa-miR-326_st           | -0.013 | 4.32E-01 | 0.910 | 5.48 | 5.49 | 5.48 | 0.081 |
| hsa-miR-26a-1-star_st    | -0.009 | 4.32E-01 | 0.910 | 5.32 | 5.33 | 5.32 | 0.053 |
| hsa-miR-219-1-3p_st      | -0.011 | 4.32E-01 | 0.910 | 5.35 | 5.37 | 5.36 | 0.065 |
| hp_hsa-mir-3153_x_st     | -0.020 | 4.32E-01 | 0.910 | 5.67 | 5.69 | 5.68 | 0.128 |
| hsa-miR-661_st           | -0.013 | 4.33E-01 | 0.910 | 5.37 | 5.38 | 5.37 | 0.084 |
| hsa-miR-142-3p_st        | -0.009 | 4.34E-01 | 0.910 | 5.26 | 5.27 | 5.27 | 0.056 |
| hp_hsa-mir-448_st        | -0.017 | 4.35E-01 | 0.910 | 5.85 | 5.86 | 5.86 | 0.109 |
| hp_hsa-mir-320b-1_st     | -0.015 | 4.35E-01 | 0.910 | 5.47 | 5.49 | 5.48 | 0.095 |
| hsa-miR-642_st           | 0.009  | 4.36E-01 | 0.910 | 5.32 | 5.31 | 5.32 | 0.053 |
| hp_hsa-mir-609_st        | -0.009 | 4.36E-01 | 0.910 | 5.42 | 5.43 | 5.43 | 0.059 |
| hp_hsa-mir-211_x_st      | -0.011 | 4.37E-01 | 0.910 | 5.49 | 5.51 | 5.50 | 0.070 |
| hp_hsa-mir-1-1_st        | 0.010  | 4.37E-01 | 0.910 | 5.37 | 5.36 | 5.37 | 0.061 |
| hp_hsa-mir-3199-2_s_st   | -0.009 | 4.37E-01 | 0.910 | 5.37 | 5.38 | 5.38 | 0.059 |
| hsa-miR-3124_st          | 0.032  | 4.38E-01 | 0.910 | 6.29 | 6.26 | 6.27 | 0.201 |
| hsa-miR-621_st           | -0.009 | 4.38E-01 | 0.910 | 5.34 | 5.35 | 5.35 | 0.060 |
| hsa-miR-187_st           | 0.048  | 4.39E-01 | 0.910 | 5.57 | 5.52 | 5.54 | 0.303 |
| hsa-miR-548u_st          | -0.022 | 4.39E-01 | 0.910 | 5.57 | 5.59 | 5.58 | 0.139 |
| hp_hsa-mir-378b_st       | -0.013 | 4.39E-01 | 0.910 | 5.61 | 5.62 | 5.61 | 0.084 |
| hp_hsa-mir-3163_st       | 0.012  | 4.40E-01 | 0.910 | 5.52 | 5.51 | 5.51 | 0.076 |
| hp_hsa-mir-142_st        | -0.013 | 4.40E-01 | 0.910 | 5.42 | 5.44 | 5.43 | 0.081 |
| hsa-miR-154-star_st      | 0.010  | 4.40E-01 | 0.910 | 5.42 | 5.41 | 5.42 | 0.065 |
| hp_hsa-mir-220a_x_st     | -0.013 | 4.41E-01 | 0.911 | 5.49 | 5.51 | 5.50 | 0.082 |
| hp_hsa-mir-133a-2_s_st   | 0.009  | 4.42E-01 | 0.913 | 5.42 | 5.42 | 5.42 | 0.054 |
| hsa-miR-153_st           | 0.008  | 4.42E-01 | 0.913 | 5.34 | 5.33 | 5.34 | 0.053 |

|                          |        |          |       |       |       |       |       |
|--------------------------|--------|----------|-------|-------|-------|-------|-------|
| hp_hsa-mir-92a-1_x_st    | 0.016  | 4.43E-01 | 0.914 | 6.10  | 6.08  | 6.09  | 0.103 |
| hp_hsa-mir-657_st        | 0.030  | 4.44E-01 | 0.915 | 6.08  | 6.05  | 6.07  | 0.196 |
| hsa-miR-556-3p_st        | -0.009 | 4.45E-01 | 0.916 | 5.31  | 5.32  | 5.32  | 0.060 |
| hp_hsa-mir-145_st        | 0.028  | 4.45E-01 | 0.916 | 6.13  | 6.10  | 6.12  | 0.178 |
| hp_hsa-mir-578_st        | -0.009 | 4.47E-01 | 0.918 | 5.45  | 5.46  | 5.46  | 0.060 |
| hp_hsa-mir-3147_st       | 0.013  | 4.47E-01 | 0.918 | 5.67  | 5.65  | 5.66  | 0.085 |
| hsa-miR-515-5p_st        | -0.011 | 4.47E-01 | 0.918 | 5.38  | 5.39  | 5.39  | 0.069 |
| hsa-miR-4296_st          | -0.010 | 4.49E-01 | 0.920 | 5.39  | 5.41  | 5.40  | 0.065 |
| hp_hsa-mir-26b_st        | 0.012  | 4.50E-01 | 0.920 | 5.77  | 5.76  | 5.76  | 0.077 |
| hp_hsa-mir-520e_x_st     | -0.007 | 4.50E-01 | 0.920 | 5.33  | 5.34  | 5.33  | 0.044 |
| hp_hsa-mir-502_x_st      | -0.016 | 4.50E-01 | 0.920 | 5.72  | 5.73  | 5.72  | 0.102 |
| hp_hsa-mir-20a_st        | 0.021  | 4.51E-01 | 0.920 | 5.67  | 5.65  | 5.66  | 0.140 |
| hp_hsa-mir-521-1_x_st    | 0.011  | 4.51E-01 | 0.921 | 5.50  | 5.49  | 5.49  | 0.069 |
| hp_hsa-mir-891b_x_st     | -0.010 | 4.52E-01 | 0.921 | 5.40  | 5.41  | 5.40  | 0.067 |
| hsa-miR-605_st           | -0.013 | 4.52E-01 | 0.921 | 5.45  | 5.47  | 5.46  | 0.083 |
| hsa-miR-3144-3p_st       | -0.012 | 4.53E-01 | 0.922 | 5.40  | 5.42  | 5.41  | 0.077 |
| hsa-miR-4321_st          | -0.025 | 4.54E-01 | 0.922 | 5.66  | 5.69  | 5.68  | 0.163 |
| hp_hsa-mir-181c_st       | -0.011 | 4.56E-01 | 0.925 | 5.49  | 5.50  | 5.49  | 0.072 |
| hp_hsa-mir-620_st        | -0.010 | 4.56E-01 | 0.925 | 5.41  | 5.42  | 5.42  | 0.068 |
| hp_hsa-mir-26a-1_st      | 0.019  | 4.57E-01 | 0.927 | 5.84  | 5.82  | 5.83  | 0.123 |
| hsa-miR-675-star_st      | -0.020 | 4.58E-01 | 0.927 | 5.53  | 5.55  | 5.54  | 0.134 |
| hsa-miR-300_st           | -0.010 | 4.59E-01 | 0.927 | 5.37  | 5.38  | 5.37  | 0.068 |
| hsa-miR-106a-star_st     | -0.009 | 4.59E-01 | 0.927 | 5.29  | 5.30  | 5.29  | 0.057 |
| hp_hsa-mir-544_st        | -0.007 | 4.60E-01 | 0.927 | 5.31  | 5.32  | 5.32  | 0.046 |
| hp_hsa-mir-548p_st       | 0.007  | 4.60E-01 | 0.927 | 5.30  | 5.29  | 5.30  | 0.047 |
| hsa-miR-490-3p_st        | 0.034  | 4.60E-01 | 0.928 | 5.49  | 5.46  | 5.47  | 0.230 |
| hsa-miR-30e-star_st      | 0.022  | 4.61E-01 | 0.928 | 5.52  | 5.49  | 5.51  | 0.148 |
| hsa-miR-371-5p_st        | -0.047 | 4.62E-01 | 0.928 | 6.09  | 6.13  | 6.11  | 0.316 |
| hsa-miR-571_st           | -0.009 | 4.62E-01 | 0.928 | 5.36  | 5.36  | 5.36  | 0.059 |
| hsa-miR-3120_st          | 0.008  | 4.62E-01 | 0.929 | 5.37  | 5.36  | 5.36  | 0.055 |
| hp_hsa-mir-892a_st       | 0.007  | 4.64E-01 | 0.931 | 5.35  | 5.35  | 5.35  | 0.049 |
| hsa-miR-548t_st          | -0.008 | 4.65E-01 | 0.931 | 5.36  | 5.37  | 5.36  | 0.057 |
| hp_hsa-mir-449b_st       | 0.010  | 4.65E-01 | 0.931 | 5.47  | 5.46  | 5.47  | 0.066 |
| hp_hsa-mir-346_st        | -0.026 | 4.65E-01 | 0.931 | 5.75  | 5.78  | 5.76  | 0.173 |
| hsa-miR-2861_st          | -0.074 | 4.66E-01 | 0.931 | 12.95 | 13.02 | 12.98 | 0.500 |
| hsa-miR-431-star_st      | 0.010  | 4.67E-01 | 0.931 | 5.40  | 5.39  | 5.39  | 0.065 |
| hsa-miR-4288_st          | -0.011 | 4.67E-01 | 0.931 | 5.47  | 5.48  | 5.48  | 0.071 |
| hp_hsa-mir-128-2_st      | -0.010 | 4.68E-01 | 0.932 | 5.48  | 5.49  | 5.49  | 0.065 |
| hp_hsa-mir-3145_st       | 0.008  | 4.69E-01 | 0.934 | 5.41  | 5.40  | 5.40  | 0.053 |
| hp_hsa-mir-220b_x_st     | -0.015 | 4.71E-01 | 0.936 | 5.70  | 5.72  | 5.71  | 0.104 |
| hsa-miR-18b_st           | -0.057 | 4.71E-01 | 0.936 | 5.92  | 5.98  | 5.95  | 0.387 |
| hsa-miR-1538_st          | 0.018  | 4.71E-01 | 0.936 | 5.61  | 5.59  | 5.60  | 0.124 |
| hsa-miR-1258_st          | -0.007 | 4.73E-01 | 0.936 | 5.31  | 5.32  | 5.31  | 0.046 |
| hsa-miR-302f_st          | 0.007  | 4.74E-01 | 0.936 | 5.28  | 5.27  | 5.27  | 0.048 |
| hp_hsa-mir-103-2-as_s_st | -0.008 | 4.74E-01 | 0.936 | 5.41  | 5.42  | 5.41  | 0.056 |
| hsa-miR-4306_st          | -0.021 | 4.75E-01 | 0.936 | 5.81  | 5.83  | 5.82  | 0.145 |
| hp_hsa-mir-130b_x_st     | -0.012 | 4.75E-01 | 0.936 | 5.81  | 5.82  | 5.82  | 0.085 |

|                        |        |          |       |       |       |       |       |
|------------------------|--------|----------|-------|-------|-------|-------|-------|
| hsa-miR-1294_st        | -0.014 | 4.75E-01 | 0.936 | 5.57  | 5.59  | 5.58  | 0.097 |
| hsa-miR-33b_st         | 0.011  | 4.76E-01 | 0.936 | 5.45  | 5.44  | 5.44  | 0.079 |
| hp_hsa-mir-513b_st     | 0.008  | 4.76E-01 | 0.936 | 5.33  | 5.32  | 5.33  | 0.057 |
| hp_hsa-mir-545_st      | 0.008  | 4.76E-01 | 0.936 | 5.39  | 5.38  | 5.39  | 0.057 |
| hp_hsa-mir-1302-5_st   | -0.007 | 4.77E-01 | 0.936 | 5.30  | 5.31  | 5.30  | 0.049 |
| hsa-miR-151-3p_st      | -0.069 | 4.77E-01 | 0.936 | 8.67  | 8.74  | 8.70  | 0.481 |
| hp_hsa-mir-585_x_st    | 0.008  | 4.77E-01 | 0.936 | 5.35  | 5.34  | 5.35  | 0.057 |
| hsa-miR-20a_st         | -0.120 | 4.79E-01 | 0.936 | 10.90 | 11.02 | 10.96 | 0.837 |
| hp_hsa-mir-1539_st     | -0.009 | 4.79E-01 | 0.936 | 5.45  | 5.46  | 5.45  | 0.065 |
| hsa-miR-499-5p_st      | 0.009  | 4.79E-01 | 0.936 | 5.32  | 5.32  | 5.32  | 0.062 |
| hp_hsa-mir-670_st      | -0.008 | 4.79E-01 | 0.936 | 5.39  | 5.40  | 5.40  | 0.056 |
| hp_hsa-mir-543_st      | 0.008  | 4.79E-01 | 0.936 | 5.41  | 5.41  | 5.41  | 0.053 |
| hp_hsa-mir-18a_st      | 0.009  | 4.80E-01 | 0.936 | 5.42  | 5.41  | 5.42  | 0.060 |
| hsa-miR-4302_st        | 0.009  | 4.80E-01 | 0.936 | 5.49  | 5.48  | 5.48  | 0.063 |
| hsa-miR-373_st         | 0.014  | 4.80E-01 | 0.936 | 5.35  | 5.34  | 5.34  | 0.098 |
| hsa-miR-3162_st        | -0.109 | 4.81E-01 | 0.936 | 8.40  | 8.51  | 8.46  | 0.762 |
| hp_hsa-mir-450a-2_x_st | 0.007  | 4.81E-01 | 0.936 | 5.33  | 5.33  | 5.33  | 0.051 |
| hsa-miR-885-5p_st      | -0.040 | 4.81E-01 | 0.936 | 6.03  | 6.07  | 6.05  | 0.278 |
| hp_hsa-let-7f-2_x_st   | 0.009  | 4.82E-01 | 0.936 | 5.62  | 5.61  | 5.61  | 0.063 |
| hp_hsa-mir-642_x_st    | 0.018  | 4.83E-01 | 0.936 | 5.77  | 5.75  | 5.76  | 0.124 |
| hp_hsa-mir-889_st      | -0.009 | 4.83E-01 | 0.936 | 5.35  | 5.35  | 5.35  | 0.060 |
| hp_hsa-mir-496_st      | 0.007  | 4.83E-01 | 0.936 | 5.32  | 5.32  | 5.32  | 0.048 |
| hsa-miR-4268_st        | -0.008 | 4.85E-01 | 0.936 | 5.27  | 5.28  | 5.27  | 0.059 |
| hsa-miR-1228_st        | -0.032 | 4.85E-01 | 0.936 | 6.24  | 6.27  | 6.25  | 0.225 |
| hp_hsa-mir-3128_x_st   | -0.015 | 4.85E-01 | 0.936 | 5.64  | 5.66  | 5.65  | 0.105 |
| hp_hsa-mir-384_st      | 0.007  | 4.85E-01 | 0.936 | 5.34  | 5.33  | 5.34  | 0.052 |
| hp_hsa-mir-664_s_st    | 0.023  | 4.86E-01 | 0.936 | 5.84  | 5.82  | 5.83  | 0.164 |
| hsa-miR-616_st         | 0.013  | 4.86E-01 | 0.936 | 5.43  | 5.42  | 5.42  | 0.094 |
| hp_hsa-mir-1257_st     | -0.012 | 4.86E-01 | 0.936 | 5.57  | 5.58  | 5.57  | 0.082 |
| hsa-miR-572_st         | -0.127 | 4.87E-01 | 0.936 | 8.38  | 8.51  | 8.45  | 0.898 |
| hsa-miR-940_st         | -0.037 | 4.87E-01 | 0.936 | 6.50  | 6.54  | 6.52  | 0.261 |
| hsa-miR-548a-5p_st     | 0.011  | 4.88E-01 | 0.936 | 5.54  | 5.53  | 5.53  | 0.081 |
| hp_hsa-mir-9-3_x_st    | -0.013 | 4.88E-01 | 0.936 | 5.62  | 5.63  | 5.63  | 0.093 |
| hsa-miR-3186-3p_st     | 0.010  | 4.89E-01 | 0.936 | 5.51  | 5.50  | 5.51  | 0.074 |
| hsa-miR-4313_st        | 0.012  | 4.89E-01 | 0.936 | 5.63  | 5.61  | 5.62  | 0.083 |
| hsa-miR-580_st         | -0.008 | 4.90E-01 | 0.936 | 5.28  | 5.29  | 5.28  | 0.054 |
| hp_hsa-mir-3180-2_s_st | -0.042 | 4.90E-01 | 0.936 | 6.75  | 6.79  | 6.77  | 0.296 |
| hsa-miR-3167_st        | 0.008  | 4.90E-01 | 0.936 | 5.28  | 5.28  | 5.28  | 0.054 |
| hsa-miR-496_st         | 0.011  | 4.90E-01 | 0.936 | 5.44  | 5.43  | 5.44  | 0.079 |
| hp_hsa-mir-548d-1_x_st | -0.007 | 4.91E-01 | 0.936 | 5.33  | 5.34  | 5.33  | 0.050 |
| hsa-miR-1254_st        | -0.018 | 4.91E-01 | 0.936 | 5.85  | 5.87  | 5.86  | 0.131 |
| hsa-miR-545_st         | 0.008  | 4.91E-01 | 0.936 | 5.34  | 5.33  | 5.34  | 0.053 |
| hp_hsa-mir-586_x_st    | -0.008 | 4.91E-01 | 0.936 | 5.33  | 5.34  | 5.33  | 0.053 |
| hsa-miR-378b_st        | 0.017  | 4.92E-01 | 0.937 | 5.90  | 5.89  | 5.89  | 0.119 |
| hp_hsa-mir-488_st      | 0.009  | 4.93E-01 | 0.937 | 5.39  | 5.38  | 5.38  | 0.065 |
| hp_hsa-mir-122_st      | 0.008  | 4.93E-01 | 0.937 | 5.33  | 5.32  | 5.33  | 0.054 |
| hp_hsa-mir-1471_st     | -0.016 | 4.95E-01 | 0.938 | 5.87  | 5.89  | 5.88  | 0.118 |

|                        |        |          |       |       |       |       |       |
|------------------------|--------|----------|-------|-------|-------|-------|-------|
| hsa-miR-590-5p_st      | -0.009 | 4.95E-01 | 0.938 | 5.35  | 5.36  | 5.36  | 0.064 |
| hsa-miR-30c-1-star_st  | -0.019 | 4.95E-01 | 0.938 | 5.64  | 5.66  | 5.65  | 0.135 |
| hsa-miR-1827_st        | 0.010  | 4.95E-01 | 0.938 | 5.40  | 5.39  | 5.40  | 0.075 |
| hsa-miR-24-1-star_st   | -0.010 | 4.96E-01 | 0.938 | 5.34  | 5.35  | 5.34  | 0.073 |
| hp_hsa-mir-9-1_x_st    | -0.010 | 4.97E-01 | 0.939 | 5.56  | 5.57  | 5.57  | 0.070 |
| hp_hsa-mir-134_st      | 0.012  | 4.97E-01 | 0.939 | 5.65  | 5.64  | 5.64  | 0.086 |
| hp_hsa-mir-3140_st     | -0.008 | 4.99E-01 | 0.941 | 5.36  | 5.36  | 5.36  | 0.055 |
| hp_hsa-mir-3163_x_st   | -0.011 | 5.00E-01 | 0.941 | 5.61  | 5.62  | 5.62  | 0.079 |
| hsa-miR-181d_st        | 0.069  | 5.00E-01 | 0.941 | 6.89  | 6.82  | 6.86  | 0.503 |
| hsa-miR-200b-star_st   | -0.076 | 5.01E-01 | 0.941 | 8.61  | 8.68  | 8.64  | 0.556 |
| hp_hsa-mir-3130-1_s_st | -0.007 | 5.01E-01 | 0.941 | 5.30  | 5.31  | 5.31  | 0.052 |
| hsa-miR-302c_st        | -0.007 | 5.02E-01 | 0.941 | 5.29  | 5.30  | 5.30  | 0.051 |
| hp_hsa-mir-383_st      | 0.009  | 5.02E-01 | 0.941 | 5.50  | 5.49  | 5.49  | 0.064 |
| hsa-miR-92b-star_st    | -0.084 | 5.02E-01 | 0.941 | 7.94  | 8.03  | 7.98  | 0.614 |
| hsa-miR-3187_st        | -0.058 | 5.02E-01 | 0.941 | 6.49  | 6.55  | 6.52  | 0.424 |
| hsa-miR-4330_st        | 0.007  | 5.03E-01 | 0.941 | 5.32  | 5.31  | 5.31  | 0.051 |
| hsa-miR-629-star_st    | -0.019 | 5.03E-01 | 0.941 | 5.72  | 5.74  | 5.73  | 0.142 |
| hp_hsa-mir-516b-2_x_st | 0.007  | 5.04E-01 | 0.942 | 5.35  | 5.35  | 5.35  | 0.052 |
| hsa-miR-449a_st        | -0.010 | 5.04E-01 | 0.942 | 5.35  | 5.36  | 5.36  | 0.072 |
| hp_hsa-mir-1912_st     | 0.006  | 5.05E-01 | 0.942 | 5.33  | 5.32  | 5.32  | 0.047 |
| hsa-miR-4277_st        | -0.009 | 5.07E-01 | 0.942 | 5.33  | 5.34  | 5.33  | 0.065 |
| hp_hsa-mir-217_st      | 0.007  | 5.07E-01 | 0.942 | 5.37  | 5.37  | 5.37  | 0.052 |
| hsa-miR-4308_st        | -0.007 | 5.08E-01 | 0.942 | 5.25  | 5.26  | 5.26  | 0.048 |
| hp_hsa-mir-15a_st      | 0.010  | 5.08E-01 | 0.942 | 5.50  | 5.49  | 5.50  | 0.072 |
| hp_hsa-mir-1179_st     | -0.007 | 5.08E-01 | 0.942 | 5.39  | 5.40  | 5.40  | 0.054 |
| hp_hsa-mir-27b_st      | -0.011 | 5.08E-01 | 0.942 | 5.47  | 5.48  | 5.47  | 0.081 |
| hsa-miR-630_st         | 0.013  | 5.08E-01 | 0.942 | 5.42  | 5.41  | 5.42  | 0.098 |
| hp_hsa-mir-128-1_st    | -0.009 | 5.09E-01 | 0.942 | 5.42  | 5.43  | 5.42  | 0.065 |
| hsa-miR-196b_st        | -0.131 | 5.09E-01 | 0.942 | 7.01  | 7.14  | 7.07  | 0.975 |
| hsa-miR-149_st         | 0.043  | 5.09E-01 | 0.942 | 6.11  | 6.07  | 6.09  | 0.319 |
| hp_hsa-mir-548f-4_x_st | -0.010 | 5.09E-01 | 0.942 | 5.60  | 5.61  | 5.61  | 0.078 |
| hp_hsa-mir-1255a_st    | -0.007 | 5.11E-01 | 0.942 | 5.31  | 5.32  | 5.31  | 0.051 |
| hsa-miR-1826_st        | -0.045 | 5.11E-01 | 0.942 | 13.71 | 13.76 | 13.73 | 0.339 |
| hp_hsa-mir-1266_st     | 0.018  | 5.11E-01 | 0.942 | 5.69  | 5.67  | 5.68  | 0.136 |
| hsa-miR-466_st         | 0.013  | 5.12E-01 | 0.942 | 5.43  | 5.42  | 5.42  | 0.098 |
| hp_hsa-mir-206_st      | 0.008  | 5.12E-01 | 0.942 | 5.38  | 5.37  | 5.37  | 0.057 |
| hsa-miR-26b-star_st    | -0.012 | 5.12E-01 | 0.942 | 5.43  | 5.45  | 5.44  | 0.089 |
| hp_hsa-mir-604_st      | -0.007 | 5.14E-01 | 0.943 | 5.41  | 5.42  | 5.42  | 0.053 |
| hsa-miR-650_st         | -0.040 | 5.14E-01 | 0.943 | 5.72  | 5.76  | 5.74  | 0.300 |
| hp_hsa-mir-2114_st     | -0.010 | 5.14E-01 | 0.943 | 5.46  | 5.47  | 5.46  | 0.075 |
| hsa-miR-602_st         | -0.057 | 5.14E-01 | 0.943 | 6.63  | 6.68  | 6.65  | 0.430 |
| hsa-miR-20b_st         | 0.096  | 5.14E-01 | 0.943 | 8.20  | 8.10  | 8.15  | 0.729 |
| hp_hsa-mir-520f_x_st   | 0.007  | 5.15E-01 | 0.943 | 5.39  | 5.38  | 5.39  | 0.049 |
| hsa-miR-581_st         | -0.007 | 5.16E-01 | 0.943 | 5.24  | 5.25  | 5.25  | 0.051 |
| hsa-miR-1268_st        | -0.076 | 5.16E-01 | 0.944 | 10.33 | 10.41 | 10.37 | 0.573 |
| hsa-miR-1304_st        | 0.008  | 5.17E-01 | 0.944 | 5.37  | 5.36  | 5.37  | 0.063 |
| hsa-miR-3131_st        | -0.025 | 5.17E-01 | 0.944 | 6.01  | 6.03  | 6.02  | 0.187 |

|                         |        |          |       |      |      |      |       |
|-------------------------|--------|----------|-------|------|------|------|-------|
| hsa-miR-3183_st         | 0.008  | 5.18E-01 | 0.944 | 5.32 | 5.31 | 5.31 | 0.060 |
| hp_hsa-mir-3143_st      | -0.023 | 5.18E-01 | 0.944 | 5.83 | 5.85 | 5.84 | 0.178 |
| hsa-miR-629_st          | -0.042 | 5.21E-01 | 0.947 | 6.55 | 6.59 | 6.57 | 0.324 |
| hp_hsa-mir-548i-1_s_st  | -0.008 | 5.21E-01 | 0.947 | 5.50 | 5.51 | 5.50 | 0.062 |
| hp_hsa-mir-374b_st      | -0.008 | 5.21E-01 | 0.947 | 5.49 | 5.50 | 5.49 | 0.063 |
| hp_hsa-mir-376b_st      | -0.010 | 5.22E-01 | 0.947 | 5.36 | 5.37 | 5.37 | 0.073 |
| hsa-miR-1250_st         | 0.009  | 5.22E-01 | 0.947 | 5.49 | 5.49 | 5.49 | 0.068 |
| hp_hsa-mir-153-1_x_st   | -0.007 | 5.24E-01 | 0.949 | 5.41 | 5.41 | 5.41 | 0.050 |
| hp_hsa-mir-216a_st      | -0.006 | 5.24E-01 | 0.949 | 5.40 | 5.41 | 5.41 | 0.049 |
| hp_hsa-mir-3141_st      | -0.020 | 5.25E-01 | 0.949 | 6.60 | 6.62 | 6.61 | 0.155 |
| hp_hsa-mir-597_st       | -0.008 | 5.27E-01 | 0.949 | 5.38 | 5.39 | 5.38 | 0.060 |
| hsa-miR-32-star_st      | 0.009  | 5.27E-01 | 0.949 | 5.41 | 5.40 | 5.41 | 0.073 |
| hp_hsa-mir-641_st       | 0.009  | 5.27E-01 | 0.949 | 5.38 | 5.37 | 5.38 | 0.067 |
| hsa-miR-381_st          | 0.018  | 5.27E-01 | 0.949 | 5.63 | 5.61 | 5.62 | 0.143 |
| hsa-miR-130a-star_st    | 0.006  | 5.27E-01 | 0.949 | 5.34 | 5.34 | 5.34 | 0.049 |
| hp_hsa-mir-548f-2_x_st  | -0.008 | 5.27E-01 | 0.949 | 5.50 | 5.51 | 5.51 | 0.065 |
| hsa-miR-4325_st         | 0.008  | 5.27E-01 | 0.949 | 5.39 | 5.38 | 5.39 | 0.065 |
| hp_hsa-mir-1244-3_s_st  | -0.008 | 5.28E-01 | 0.949 | 5.33 | 5.34 | 5.33 | 0.059 |
| hsa-miR-584_st          | 0.061  | 5.28E-01 | 0.949 | 6.25 | 6.19 | 6.22 | 0.474 |
| hp_hsa-mir-875_st       | -0.007 | 5.29E-01 | 0.949 | 5.32 | 5.33 | 5.33 | 0.052 |
| hp_hsa-mir-329-2_s_st   | 0.006  | 5.30E-01 | 0.951 | 5.34 | 5.34 | 5.34 | 0.046 |
| hp_hsa-mir-500b_st      | 0.013  | 5.31E-01 | 0.951 | 5.58 | 5.57 | 5.58 | 0.102 |
| hp_hsa-mir-449c_st      | -0.008 | 5.31E-01 | 0.951 | 5.37 | 5.37 | 5.37 | 0.059 |
| hp_hsa-mir-1184-3_s_st  | 0.010  | 5.31E-01 | 0.951 | 5.59 | 5.58 | 5.59 | 0.081 |
| hsa-miR-4258_st         | -0.015 | 5.32E-01 | 0.951 | 5.65 | 5.67 | 5.66 | 0.115 |
| hp_hsa-mir-149_st       | 0.008  | 5.33E-01 | 0.952 | 5.59 | 5.58 | 5.59 | 0.065 |
| hp_hsa-mir-1302-11_s_st | 0.009  | 5.33E-01 | 0.952 | 5.32 | 5.31 | 5.31 | 0.073 |
| hp_hsa-mir-532_st       | -0.015 | 5.34E-01 | 0.953 | 6.07 | 6.09 | 6.08 | 0.116 |
| hp_hsa-mir-17_st        | 0.012  | 5.35E-01 | 0.953 | 5.52 | 5.51 | 5.51 | 0.095 |
| hsa-miR-4316_st         | 0.008  | 5.36E-01 | 0.954 | 5.58 | 5.57 | 5.58 | 0.063 |
| hp_hsa-mir-1263_st      | -0.013 | 5.36E-01 | 0.954 | 5.64 | 5.66 | 5.65 | 0.106 |
| hsa-miR-191-star_st     | -0.037 | 5.36E-01 | 0.954 | 6.19 | 6.23 | 6.21 | 0.298 |
| hsa-miR-20a-star_st     | -0.007 | 5.38E-01 | 0.956 | 5.34 | 5.34 | 5.34 | 0.058 |
| hp_hsa-mir-505_x_st     | -0.016 | 5.39E-01 | 0.956 | 5.64 | 5.65 | 5.65 | 0.127 |
| hp_hsa-mir-1306_st      | 0.010  | 5.39E-01 | 0.956 | 5.55 | 5.54 | 5.54 | 0.079 |
| hsa-miR-2052_st         | -0.006 | 5.40E-01 | 0.956 | 5.28 | 5.28 | 5.28 | 0.048 |
| hsa-miR-4300_st         | 0.008  | 5.40E-01 | 0.956 | 5.32 | 5.31 | 5.31 | 0.062 |
| hsa-miR-649_st          | -0.007 | 5.40E-01 | 0.956 | 5.28 | 5.29 | 5.28 | 0.055 |
| hsa-miR-340_st          | -0.009 | 5.42E-01 | 0.957 | 5.35 | 5.36 | 5.36 | 0.069 |
| hsa-miR-2276_st         | 0.022  | 5.44E-01 | 0.957 | 5.94 | 5.91 | 5.92 | 0.175 |
| hp_hsa-mir-370_st       | 0.009  | 5.44E-01 | 0.957 | 5.63 | 5.62 | 5.63 | 0.074 |
| hsa-miR-3140_st         | 0.007  | 5.44E-01 | 0.957 | 5.35 | 5.35 | 5.35 | 0.057 |
| hp_hsa-mir-548o_st      | 0.006  | 5.45E-01 | 0.957 | 5.35 | 5.35 | 5.35 | 0.052 |
| hsa-miR-708-star_st     | 0.007  | 5.46E-01 | 0.957 | 5.34 | 5.33 | 5.34 | 0.054 |
| hsa-miR-224_st          | 0.074  | 5.46E-01 | 0.957 | 6.55 | 6.47 | 6.51 | 0.607 |
| hsa-miR-454-star_st     | -0.006 | 5.46E-01 | 0.957 | 5.30 | 5.31 | 5.30 | 0.051 |
| hp_hsa-mir-4272_st      | -0.005 | 5.46E-01 | 0.957 | 5.29 | 5.30 | 5.30 | 0.043 |

|                        |        |          |       |       |       |       |       |
|------------------------|--------|----------|-------|-------|-------|-------|-------|
| hp_hsa-mir-20b_st      | 0.012  | 5.47E-01 | 0.957 | 5.58  | 5.56  | 5.57  | 0.097 |
| hsa-miR-30b_st         | 0.074  | 5.47E-01 | 0.957 | 8.03  | 7.96  | 8.00  | 0.603 |
| hp_hsa-mir-4263_st     | -0.009 | 5.47E-01 | 0.957 | 5.54  | 5.55  | 5.55  | 0.074 |
| hp_hsa-mir-4264_st     | 0.007  | 5.47E-01 | 0.957 | 5.46  | 5.46  | 5.46  | 0.055 |
| hp_hsa-mir-3179-1_s_st | 0.009  | 5.48E-01 | 0.957 | 5.48  | 5.47  | 5.47  | 0.074 |
| hsa-miR-340-star_st    | -0.007 | 5.48E-01 | 0.957 | 5.29  | 5.30  | 5.30  | 0.058 |
| hsa-miR-541-star_st    | 0.011  | 5.48E-01 | 0.957 | 5.62  | 5.61  | 5.61  | 0.087 |
| hp_hsa-mir-619_st      | -0.006 | 5.49E-01 | 0.957 | 5.31  | 5.31  | 5.31  | 0.046 |
| hp_hsa-mir-30a_x_st    | 0.010  | 5.49E-01 | 0.957 | 5.54  | 5.53  | 5.53  | 0.081 |
| hsa-miR-1225-3p_st     | -0.014 | 5.50E-01 | 0.957 | 5.61  | 5.62  | 5.61  | 0.112 |
| hp_hsa-mir-3167_st     | -0.007 | 5.51E-01 | 0.957 | 5.36  | 5.36  | 5.36  | 0.053 |
| hp_hsa-mir-7-1_st      | 0.007  | 5.51E-01 | 0.957 | 5.36  | 5.36  | 5.36  | 0.057 |
| hsa-miR-497-star_st    | 0.007  | 5.51E-01 | 0.957 | 5.31  | 5.30  | 5.31  | 0.053 |
| hp_hsa-mir-202_st      | -0.010 | 5.52E-01 | 0.957 | 5.53  | 5.53  | 5.53  | 0.079 |
| hp_hsa-mir-367_st      | -0.007 | 5.52E-01 | 0.957 | 5.39  | 5.39  | 5.39  | 0.055 |
| hsa-miR-548c-3p_st     | 0.011  | 5.53E-01 | 0.957 | 5.39  | 5.38  | 5.38  | 0.091 |
| hp_hsa-mir-29a_st      | 0.012  | 5.53E-01 | 0.957 | 5.58  | 5.57  | 5.58  | 0.099 |
| hsa-miR-518f_st        | -0.005 | 5.53E-01 | 0.957 | 5.30  | 5.30  | 5.30  | 0.044 |
| hsa-miR-620_st         | 0.007  | 5.54E-01 | 0.957 | 5.36  | 5.35  | 5.35  | 0.054 |
| hp_hsa-mir-645_st      | -0.008 | 5.54E-01 | 0.957 | 5.55  | 5.56  | 5.56  | 0.063 |
| hsa-miR-658_st         | -0.017 | 5.55E-01 | 0.957 | 5.88  | 5.90  | 5.89  | 0.144 |
| hp_hsa-mir-1236_st     | 0.009  | 5.57E-01 | 0.957 | 5.48  | 5.47  | 5.47  | 0.078 |
| hp_hsa-mir-15b_st      | 0.010  | 5.57E-01 | 0.957 | 5.73  | 5.72  | 5.73  | 0.080 |
| hp_hsa-mir-607_x_st    | 0.011  | 5.57E-01 | 0.957 | 5.75  | 5.74  | 5.75  | 0.089 |
| hp_hsa-mir-490_st      | -0.007 | 5.57E-01 | 0.957 | 5.40  | 5.41  | 5.40  | 0.057 |
| hp_hsa-mir-1266_x_st   | -0.013 | 5.57E-01 | 0.957 | 5.66  | 5.67  | 5.67  | 0.112 |
| hsa-miR-7_st           | 0.029  | 5.58E-01 | 0.957 | 5.51  | 5.48  | 5.50  | 0.246 |
| hp_hsa-mir-19b-1_x_st  | 0.022  | 5.58E-01 | 0.957 | 5.90  | 5.88  | 5.89  | 0.187 |
| hsa-miR-4290_st        | -0.015 | 5.59E-01 | 0.957 | 5.65  | 5.67  | 5.66  | 0.125 |
| hp_hsa-mir-219-2_st    | -0.007 | 5.59E-01 | 0.957 | 5.39  | 5.40  | 5.40  | 0.062 |
| hsa-miR-623_st         | -0.019 | 5.60E-01 | 0.957 | 5.69  | 5.71  | 5.70  | 0.158 |
| hp_hsa-mir-3132_st     | -0.013 | 5.60E-01 | 0.957 | 5.84  | 5.85  | 5.84  | 0.110 |
| hsa-miR-15a-star_st    | -0.010 | 5.61E-01 | 0.957 | 5.44  | 5.45  | 5.45  | 0.084 |
| hsa-miR-644_st         | -0.008 | 5.61E-01 | 0.957 | 5.34  | 5.35  | 5.35  | 0.064 |
| hp_hsa-mir-218-2_st    | -0.007 | 5.61E-01 | 0.957 | 5.43  | 5.44  | 5.43  | 0.055 |
| hp_hsa-mir-1255b-1_st  | 0.007  | 5.61E-01 | 0.957 | 5.36  | 5.35  | 5.36  | 0.061 |
| hsa-miR-30c-2-star_st  | 0.015  | 5.61E-01 | 0.957 | 5.60  | 5.59  | 5.60  | 0.128 |
| hp_hsa-mir-595_st      | -0.006 | 5.62E-01 | 0.957 | 5.42  | 5.43  | 5.42  | 0.051 |
| hsa-miR-578_st         | -0.008 | 5.62E-01 | 0.957 | 5.36  | 5.36  | 5.36  | 0.065 |
| hp_hsa-mir-1911_st     | 0.009  | 5.64E-01 | 0.957 | 5.70  | 5.69  | 5.70  | 0.076 |
| hsa-miR-3126-5p_st     | 0.013  | 5.65E-01 | 0.957 | 5.63  | 5.62  | 5.62  | 0.108 |
| hp_hsa-mir-2861_st     | -0.023 | 5.66E-01 | 0.957 | 6.65  | 6.67  | 6.66  | 0.198 |
| hsa-miR-3065-3p_st     | 0.011  | 5.66E-01 | 0.957 | 5.40  | 5.39  | 5.40  | 0.093 |
| hp_hsa-mir-1184-2_s_st | 0.007  | 5.67E-01 | 0.957 | 5.59  | 5.58  | 5.58  | 0.062 |
| hsa-miR-107_st         | -0.042 | 5.67E-01 | 0.957 | 11.79 | 11.84 | 11.81 | 0.363 |
| hp_hsa-mir-1468_st     | -0.006 | 5.67E-01 | 0.957 | 5.33  | 5.34  | 5.33  | 0.053 |
| hsa-miR-760_st         | -0.029 | 5.69E-01 | 0.957 | 5.84  | 5.87  | 5.86  | 0.253 |

|                        |        |          |       |       |       |       |       |
|------------------------|--------|----------|-------|-------|-------|-------|-------|
| hsa-miR-3145_st        | -0.006 | 5.69E-01 | 0.957 | 5.28  | 5.28  | 5.28  | 0.047 |
| hsa-miR-648_st         | -0.009 | 5.69E-01 | 0.957 | 5.62  | 5.62  | 5.62  | 0.081 |
| hsa-miR-4305_st        | -0.007 | 5.70E-01 | 0.957 | 5.36  | 5.37  | 5.37  | 0.062 |
| hp_hsa-mir-510_st      | -0.009 | 5.71E-01 | 0.957 | 5.43  | 5.44  | 5.43  | 0.082 |
| hp_hsa-mir-4315-2_s_st | -0.014 | 5.71E-01 | 0.957 | 5.74  | 5.75  | 5.75  | 0.121 |
| hsa-miR-614_st         | 0.006  | 5.71E-01 | 0.957 | 5.35  | 5.34  | 5.35  | 0.052 |
| hp_hsa-mir-1265_st     | -0.006 | 5.71E-01 | 0.957 | 5.48  | 5.48  | 5.48  | 0.054 |
| hp_hsa-let-7b_st       | 0.009  | 5.72E-01 | 0.957 | 6.36  | 6.35  | 6.36  | 0.074 |
| hsa-miR-3198_st        | -0.013 | 5.72E-01 | 0.957 | 5.68  | 5.69  | 5.68  | 0.111 |
| hp_hsa-mir-1251_st     | 0.006  | 5.72E-01 | 0.957 | 5.35  | 5.35  | 5.35  | 0.048 |
| hp_hsa-mir-199a-2_x_st | 0.008  | 5.72E-01 | 0.957 | 5.42  | 5.41  | 5.42  | 0.070 |
| hsa-miR-103-2-star_st  | 0.009  | 5.72E-01 | 0.957 | 5.41  | 5.40  | 5.41  | 0.076 |
| hp_hsa-mir-920_st      | 0.009  | 5.72E-01 | 0.957 | 5.72  | 5.71  | 5.71  | 0.080 |
| hsa-miR-1262_st        | 0.007  | 5.72E-01 | 0.957 | 5.35  | 5.34  | 5.35  | 0.061 |
| hp_hsa-mir-3152_st     | -0.009 | 5.72E-01 | 0.957 | 5.46  | 5.47  | 5.46  | 0.077 |
| hsa-miR-223-star_st    | -0.006 | 5.72E-01 | 0.957 | 5.33  | 5.33  | 5.33  | 0.052 |
| hp_hsa-mir-27a_st      | -0.023 | 5.73E-01 | 0.957 | 5.74  | 5.76  | 5.75  | 0.200 |
| hp_hsa-mir-302d_st     | -0.008 | 5.73E-01 | 0.957 | 5.39  | 5.40  | 5.39  | 0.072 |
| hp_hsa-mir-194-1_st    | -0.006 | 5.73E-01 | 0.957 | 5.32  | 5.33  | 5.32  | 0.048 |
| hsa-miR-10a-star_st    | 0.021  | 5.74E-01 | 0.958 | 5.55  | 5.53  | 5.54  | 0.180 |
| hsa-miR-18a-star_st    | -0.053 | 5.74E-01 | 0.958 | 6.14  | 6.19  | 6.17  | 0.464 |
| hp_hsa-mir-151_st      | 0.015  | 5.77E-01 | 0.958 | 6.10  | 6.09  | 6.09  | 0.136 |
| hsa-miR-432-star_st    | -0.008 | 5.77E-01 | 0.958 | 5.44  | 5.45  | 5.44  | 0.073 |
| hp_hsa-mir-25_st       | -0.013 | 5.78E-01 | 0.958 | 5.81  | 5.82  | 5.82  | 0.111 |
| hp_hsa-mir-3165_st     | 0.006  | 5.78E-01 | 0.958 | 5.33  | 5.32  | 5.33  | 0.055 |
| hp_hsa-mir-92a-2_x_st  | -0.014 | 5.78E-01 | 0.958 | 6.57  | 6.58  | 6.57  | 0.127 |
| hp_hsa-mir-573_st      | -0.006 | 5.78E-01 | 0.958 | 5.38  | 5.39  | 5.39  | 0.054 |
| hp_hsa-mir-1283-1_x_st | 0.005  | 5.79E-01 | 0.958 | 5.30  | 5.29  | 5.29  | 0.047 |
| hp_hsa-mir-208b_st     | -0.006 | 5.80E-01 | 0.958 | 5.41  | 5.41  | 5.41  | 0.056 |
| hp_hsa-mir-4257_st     | -0.010 | 5.80E-01 | 0.958 | 5.72  | 5.74  | 5.73  | 0.093 |
| hp_hsa-mir-320c-1_st   | -0.035 | 5.81E-01 | 0.958 | 7.15  | 7.18  | 7.17  | 0.308 |
| hp_hsa-mir-548h-3_st   | -0.007 | 5.81E-01 | 0.958 | 5.45  | 5.46  | 5.46  | 0.060 |
| hsa-miR-876-3p_st      | 0.005  | 5.81E-01 | 0.958 | 5.29  | 5.29  | 5.29  | 0.045 |
| hsa-miR-548s_st        | -0.005 | 5.81E-01 | 0.958 | 5.31  | 5.32  | 5.31  | 0.046 |
| hp_hsa-mir-4295_st     | 0.006  | 5.81E-01 | 0.958 | 5.36  | 5.35  | 5.35  | 0.052 |
| hsa-miR-126-star_st    | -0.006 | 5.82E-01 | 0.958 | 5.31  | 5.32  | 5.32  | 0.054 |
| hp_hsa-mir-606_x_st    | -0.008 | 5.83E-01 | 0.958 | 5.42  | 5.43  | 5.42  | 0.068 |
| hp_hsa-mir-19a_st      | -0.006 | 5.83E-01 | 0.958 | 5.39  | 5.39  | 5.39  | 0.054 |
| hp_hsa-mir-154_st      | -0.006 | 5.83E-01 | 0.958 | 5.34  | 5.34  | 5.34  | 0.056 |
| hsa-miR-548i_st        | -0.006 | 5.84E-01 | 0.958 | 5.37  | 5.37  | 5.37  | 0.055 |
| hp_hsa-mir-616_st      | 0.005  | 5.84E-01 | 0.958 | 5.35  | 5.35  | 5.35  | 0.047 |
| hsa-miR-27a-star_st    | 0.053  | 5.84E-01 | 0.958 | 6.24  | 6.19  | 6.22  | 0.475 |
| hsa-miR-3150_st        | -0.008 | 5.85E-01 | 0.958 | 5.44  | 5.45  | 5.44  | 0.072 |
| hsa-miR-541_st         | 0.008  | 5.86E-01 | 0.958 | 5.45  | 5.44  | 5.45  | 0.074 |
| hp_hsa-mir-1913_st     | -0.010 | 5.86E-01 | 0.958 | 5.60  | 5.61  | 5.61  | 0.090 |
| hsa-miR-143_st         | 0.100  | 5.87E-01 | 0.958 | 12.01 | 11.91 | 11.97 | 0.906 |
| hp_hsa-mir-3116-1_s_st | -0.006 | 5.87E-01 | 0.958 | 5.41  | 5.41  | 5.41  | 0.057 |



|                        |        |          |       |      |      |      |       |
|------------------------|--------|----------|-------|------|------|------|-------|
| hp_hsa-mir-302c_st     | -0.007 | 5.87E-01 | 0.958 | 5.42 | 5.43 | 5.42 | 0.061 |
| hp_hsa-mir-629_st      | -0.010 | 5.87E-01 | 0.958 | 6.03 | 6.04 | 6.04 | 0.092 |
| hp_hsa-mir-133a-1_s_st | 0.007  | 5.88E-01 | 0.958 | 5.38 | 5.37 | 5.37 | 0.061 |
| hp_hsa-mir-224_st      | 0.029  | 5.88E-01 | 0.958 | 6.09 | 6.06 | 6.07 | 0.261 |
| hp_hsa-mir-4274_st     | -0.011 | 5.91E-01 | 0.958 | 5.63 | 5.64 | 5.64 | 0.097 |
| hp_hsa-mir-323b_st     | -0.006 | 5.91E-01 | 0.958 | 5.40 | 5.40 | 5.40 | 0.057 |
| hp_hsa-mir-140_st      | -0.010 | 5.91E-01 | 0.958 | 6.31 | 6.32 | 6.32 | 0.093 |
| hsa-miR-517c_st        | 0.006  | 5.91E-01 | 0.958 | 5.28 | 5.27 | 5.28 | 0.055 |
| hp_hsa-mir-647_st      | -0.016 | 5.91E-01 | 0.958 | 6.40 | 6.41 | 6.40 | 0.148 |
| hsa-miR-3154_st        | 0.027  | 5.91E-01 | 0.958 | 6.10 | 6.08 | 6.09 | 0.250 |
| hp_hsa-mir-557_st      | -0.009 | 5.91E-01 | 0.958 | 5.49 | 5.49 | 5.49 | 0.080 |
| hsa-miR-624_st         | -0.007 | 5.91E-01 | 0.958 | 5.30 | 5.31 | 5.31 | 0.061 |
| hp_hsa-mir-3157_st     | 0.007  | 5.92E-01 | 0.958 | 5.46 | 5.45 | 5.45 | 0.060 |
| hp_hsa-mir-635_st      | -0.006 | 5.92E-01 | 0.958 | 5.36 | 5.37 | 5.36 | 0.054 |
| hsa-miR-548e_st        | -0.006 | 5.93E-01 | 0.958 | 5.28 | 5.29 | 5.29 | 0.053 |
| hp_hsa-mir-3135_st     | 0.008  | 5.93E-01 | 0.958 | 5.38 | 5.37 | 5.38 | 0.069 |
| hsa-miR-877_st         | -0.035 | 5.93E-01 | 0.958 | 6.80 | 6.84 | 6.82 | 0.326 |
| hsa-miR-4280_st        | -0.005 | 5.96E-01 | 0.961 | 5.38 | 5.39 | 5.39 | 0.049 |
| hsa-miR-34a-star_st    | -0.015 | 5.97E-01 | 0.961 | 5.60 | 5.62 | 5.61 | 0.144 |
| hsa-miR-873_st         | 0.005  | 5.98E-01 | 0.961 | 5.28 | 5.27 | 5.27 | 0.047 |
| hsa-miR-548w_st        | -0.006 | 5.98E-01 | 0.961 | 5.35 | 5.36 | 5.35 | 0.055 |
| hsa-miR-1255a_st       | -0.006 | 5.98E-01 | 0.961 | 5.36 | 5.36 | 5.36 | 0.060 |
| hp_hsa-mir-1269_x_st   | 0.011  | 5.99E-01 | 0.961 | 5.69 | 5.67 | 5.68 | 0.103 |
| hsa-miR-1185_st        | 0.007  | 5.99E-01 | 0.961 | 5.32 | 5.31 | 5.31 | 0.064 |
| hp_hsa-mir-570_x_st    | -0.007 | 5.99E-01 | 0.961 | 5.44 | 5.44 | 5.44 | 0.067 |
| hp_hsa-mir-511-2_s_st  | -0.006 | 5.99E-01 | 0.961 | 5.39 | 5.39 | 5.39 | 0.060 |
| hp_hsa-mir-376a-1_x_st | 0.006  | 6.00E-01 | 0.961 | 5.35 | 5.34 | 5.35 | 0.054 |
| hp_hsa-mir-3155_st     | 0.009  | 6.00E-01 | 0.961 | 5.88 | 5.87 | 5.87 | 0.084 |
| hsa-miR-2355_st        | -0.007 | 6.01E-01 | 0.961 | 5.34 | 5.35 | 5.34 | 0.062 |
| hsa-miR-450b-3p_st     | -0.005 | 6.01E-01 | 0.961 | 5.27 | 5.27 | 5.27 | 0.051 |
| hsa-miR-1229_st        | -0.009 | 6.02E-01 | 0.961 | 5.54 | 5.55 | 5.55 | 0.089 |
| hp_hsa-mir-548h-4_x_st | -0.006 | 6.02E-01 | 0.961 | 5.38 | 5.39 | 5.38 | 0.058 |
| hp_hsa-mir-1282_st     | -0.011 | 6.03E-01 | 0.961 | 5.77 | 5.79 | 5.78 | 0.105 |
| hp_hsa-mir-3121_st     | 0.009  | 6.03E-01 | 0.961 | 5.61 | 5.60 | 5.60 | 0.080 |
| hsa-miR-3141_st        | -0.069 | 6.04E-01 | 0.961 | 9.03 | 9.10 | 9.06 | 0.653 |
| hp_hsa-mir-3185_st     | -0.035 | 6.04E-01 | 0.961 | 7.11 | 7.14 | 7.13 | 0.330 |
| hsa-miR-155-star_st    | -0.011 | 6.04E-01 | 0.961 | 5.44 | 5.45 | 5.45 | 0.105 |
| hsa-miR-449c-star_st   | -0.007 | 6.05E-01 | 0.961 | 5.34 | 5.34 | 5.34 | 0.064 |
| hp_hsa-mir-329-1_s_st  | -0.006 | 6.05E-01 | 0.961 | 5.39 | 5.40 | 5.39 | 0.052 |
| hp_hsa-mir-9-1_st      | 0.007  | 6.05E-01 | 0.961 | 5.43 | 5.42 | 5.42 | 0.062 |
| hsa-miR-34c-5p_st      | 0.009  | 6.06E-01 | 0.961 | 5.43 | 5.42 | 5.43 | 0.090 |
| hp_hsa-mir-4279_st     | -0.009 | 6.06E-01 | 0.961 | 5.46 | 5.47 | 5.47 | 0.084 |
| hp_hsa-mir-4261_st     | 0.010  | 6.08E-01 | 0.963 | 5.82 | 5.81 | 5.82 | 0.091 |
| hp_hsa-mir-200a_st     | -0.013 | 6.08E-01 | 0.963 | 5.76 | 5.77 | 5.76 | 0.123 |
| hsa-miR-374b-star_st   | -0.006 | 6.09E-01 | 0.963 | 5.28 | 5.29 | 5.28 | 0.054 |
| hsa-miR-518d-5p_st     | 0.008  | 6.09E-01 | 0.963 | 5.51 | 5.50 | 5.51 | 0.078 |
| hp_hsa-mir-3186_st     | 0.009  | 6.09E-01 | 0.963 | 5.67 | 5.66 | 5.67 | 0.083 |

|                        |        |          |       |      |      |      |       |
|------------------------|--------|----------|-------|------|------|------|-------|
| hsa-miR-34a_st         | 0.059  | 6.11E-01 | 0.963 | 9.03 | 8.97 | 9.00 | 0.570 |
| hp_hsa-mir-548i-2_s_st | -0.007 | 6.11E-01 | 0.963 | 5.46 | 5.47 | 5.46 | 0.069 |
| hp_hsa-mir-3115_st     | 0.005  | 6.11E-01 | 0.963 | 5.43 | 5.42 | 5.43 | 0.051 |
| hp_hsa-mir-934_st      | 0.014  | 6.11E-01 | 0.963 | 6.07 | 6.05 | 6.06 | 0.131 |
| hp_hsa-mir-520e_st     | -0.006 | 6.12E-01 | 0.963 | 5.35 | 5.35 | 5.35 | 0.054 |
| hp_hsa-mir-378b_x_st   | -0.009 | 6.12E-01 | 0.963 | 5.64 | 5.65 | 5.64 | 0.085 |
| hsa-miR-892b_st        | -0.006 | 6.12E-01 | 0.963 | 5.34 | 5.34 | 5.34 | 0.054 |
| hsa-miR-3168_st        | -0.006 | 6.13E-01 | 0.963 | 5.32 | 5.32 | 5.32 | 0.057 |
| hp_hsa-mir-649_st      | -0.006 | 6.15E-01 | 0.965 | 5.37 | 5.38 | 5.38 | 0.055 |
| hp_hsa-mir-3138_st     | 0.009  | 6.16E-01 | 0.965 | 5.69 | 5.68 | 5.69 | 0.087 |
| hp_hsa-mir-4311_st     | -0.009 | 6.17E-01 | 0.965 | 5.63 | 5.64 | 5.63 | 0.084 |
| hsa-miR-586_st         | -0.007 | 6.18E-01 | 0.965 | 5.43 | 5.43 | 5.43 | 0.066 |
| hsa-miR-4315_st        | -0.008 | 6.18E-01 | 0.965 | 5.31 | 5.32 | 5.32 | 0.078 |
| hsa-miR-550-star_st    | -0.018 | 6.18E-01 | 0.965 | 5.77 | 5.78 | 5.78 | 0.176 |
| hp_hsa-mir-1244-2_s_st | -0.006 | 6.18E-01 | 0.965 | 5.36 | 5.36 | 5.36 | 0.055 |
| hsa-miR-1247_st        | -0.021 | 6.19E-01 | 0.965 | 5.59 | 5.61 | 5.60 | 0.207 |
| hsa-miR-4275_st        | 0.007  | 6.19E-01 | 0.965 | 5.34 | 5.33 | 5.33 | 0.068 |
| hp_hsa-mir-555_st      | 0.007  | 6.19E-01 | 0.965 | 5.42 | 5.42 | 5.42 | 0.066 |
| hp_hsa-mir-181d_x_st   | 0.008  | 6.19E-01 | 0.965 | 5.51 | 5.50 | 5.51 | 0.076 |
| hsa-miR-1287_st        | -0.014 | 6.20E-01 | 0.965 | 5.65 | 5.66 | 5.65 | 0.139 |
| hp_hsa-mir-642_st      | -0.015 | 6.20E-01 | 0.965 | 6.14 | 6.15 | 6.15 | 0.152 |
| hp_hsa-mir-3122_st     | 0.006  | 6.21E-01 | 0.966 | 5.37 | 5.36 | 5.37 | 0.061 |
| hsa-miR-223_st         | 0.039  | 6.21E-01 | 0.966 | 6.07 | 6.03 | 6.05 | 0.392 |
| hsa-miR-128_st         | -0.037 | 6.21E-01 | 0.966 | 6.27 | 6.31 | 6.29 | 0.370 |
| hsa-miR-593_st         | 0.006  | 6.23E-01 | 0.967 | 5.34 | 5.33 | 5.33 | 0.057 |
| hp_hsa-mir-4267_st     | 0.019  | 6.24E-01 | 0.967 | 6.39 | 6.37 | 6.38 | 0.194 |
| hp_hsa-mir-1193_st     | -0.005 | 6.24E-01 | 0.967 | 5.43 | 5.44 | 5.44 | 0.054 |
| hp_hsa-mir-516a-2_s_st | -0.006 | 6.24E-01 | 0.967 | 5.42 | 5.43 | 5.42 | 0.057 |
| hp_hsa-mir-4302_st     | -0.007 | 6.25E-01 | 0.967 | 5.50 | 5.51 | 5.51 | 0.070 |
| hsa-miR-548f_st        | -0.006 | 6.25E-01 | 0.968 | 5.33 | 5.34 | 5.33 | 0.060 |
| hsa-miR-548o_st        | 0.005  | 6.26E-01 | 0.968 | 5.31 | 5.30 | 5.30 | 0.048 |
| hp_hsa-mir-4303_st     | -0.005 | 6.27E-01 | 0.968 | 5.31 | 5.32 | 5.31 | 0.045 |
| hp_hsa-mir-338_s_st    | 0.005  | 6.27E-01 | 0.968 | 5.42 | 5.42 | 5.42 | 0.055 |
| hsa-miR-2278_st        | 0.008  | 6.27E-01 | 0.968 | 5.57 | 5.56 | 5.57 | 0.078 |
| hp_hsa-mir-562_st      | 0.005  | 6.28E-01 | 0.969 | 5.33 | 5.32 | 5.32 | 0.046 |
| hsa-miR-519b-3p_st     | -0.007 | 6.29E-01 | 0.969 | 5.39 | 5.39 | 5.39 | 0.069 |
| hsa-miR-494_st         | 0.053  | 6.29E-01 | 0.969 | 9.73 | 9.68 | 9.71 | 0.537 |
| hp_hsa-mir-582_x_st    | 0.005  | 6.30E-01 | 0.969 | 5.36 | 5.35 | 5.35 | 0.049 |
| hsa-miR-197_st         | 0.030  | 6.32E-01 | 0.970 | 6.32 | 6.29 | 6.31 | 0.305 |
| hsa-miR-1284_st        | 0.006  | 6.32E-01 | 0.970 | 5.35 | 5.35 | 5.35 | 0.057 |
| hp_hsa-mir-199a-1_st   | -0.005 | 6.33E-01 | 0.970 | 5.32 | 5.33 | 5.32 | 0.053 |
| hp_hsa-mir-1302-3_s_st | -0.006 | 6.33E-01 | 0.970 | 5.37 | 5.38 | 5.38 | 0.059 |
| hp_hsa-mir-3201_st     | -0.005 | 6.33E-01 | 0.970 | 5.37 | 5.38 | 5.38 | 0.055 |
| hsa-miR-3157_st        | -0.006 | 6.33E-01 | 0.970 | 5.32 | 5.33 | 5.33 | 0.058 |
| hsa-miR-105-star_st    | 0.006  | 6.34E-01 | 0.970 | 5.41 | 5.40 | 5.40 | 0.059 |
| hp_hsa-mir-551b_st     | -0.009 | 6.34E-01 | 0.970 | 5.66 | 5.67 | 5.66 | 0.089 |
| hp_hsa-mir-449a_st     | -0.006 | 6.34E-01 | 0.970 | 5.41 | 5.42 | 5.41 | 0.066 |

|                        |        |          |       |       |       |       |       |
|------------------------|--------|----------|-------|-------|-------|-------|-------|
| hp_hsa-mir-30e_st      | -0.024 | 6.35E-01 | 0.970 | 6.01  | 6.03  | 6.02  | 0.254 |
| hsa-miR-518c_st        | -0.006 | 6.35E-01 | 0.970 | 5.27  | 5.27  | 5.27  | 0.060 |
| hsa-miR-206_st         | -0.009 | 6.35E-01 | 0.970 | 5.42  | 5.43  | 5.42  | 0.090 |
| hp_hsa-mir-138-2_st    | 0.006  | 6.36E-01 | 0.970 | 5.43  | 5.43  | 5.43  | 0.063 |
| hsa-miR-3179_st        | 0.005  | 6.37E-01 | 0.970 | 5.31  | 5.30  | 5.31  | 0.054 |
| hp_hsa-mir-1827_st     | -0.007 | 6.37E-01 | 0.970 | 5.49  | 5.50  | 5.50  | 0.069 |
| hsa-miR-1267_st        | 0.006  | 6.38E-01 | 0.970 | 5.43  | 5.43  | 5.43  | 0.065 |
| hp_hsa-mir-337_st      | 0.006  | 6.39E-01 | 0.970 | 5.46  | 5.46  | 5.46  | 0.067 |
| hp_hsa-mir-1259_s_st   | -0.018 | 6.40E-01 | 0.970 | 5.76  | 5.78  | 5.77  | 0.185 |
| hsa-miR-505-star_st    | -0.033 | 6.40E-01 | 0.970 | 6.47  | 6.50  | 6.49  | 0.345 |
| hp_hsa-mir-30c-2_x_st  | 0.007  | 6.41E-01 | 0.970 | 5.60  | 5.60  | 5.60  | 0.077 |
| hp_hsa-mir-548f-5_x_st | 0.005  | 6.41E-01 | 0.970 | 5.46  | 5.45  | 5.46  | 0.057 |
| hp_hsa-mir-422a_st     | -0.005 | 6.42E-01 | 0.970 | 5.38  | 5.38  | 5.38  | 0.057 |
| hsa-miR-520d-3p_st     | 0.007  | 6.42E-01 | 0.970 | 5.42  | 5.41  | 5.41  | 0.073 |
| hp_hsa-mir-301b_x_st   | -0.005 | 6.42E-01 | 0.970 | 5.34  | 5.35  | 5.34  | 0.050 |
| hp_hsa-mir-1304_x_st   | 0.007  | 6.42E-01 | 0.970 | 5.39  | 5.39  | 5.39  | 0.068 |
| hp_hsa-mir-1227_st     | -0.018 | 6.44E-01 | 0.970 | 6.20  | 6.22  | 6.21  | 0.192 |
| hsa-miR-1303_st        | -0.009 | 6.44E-01 | 0.970 | 5.55  | 5.56  | 5.55  | 0.100 |
| hp_hsa-mir-1274b_x_st  | 0.009  | 6.45E-01 | 0.970 | 5.58  | 5.57  | 5.57  | 0.096 |
| hsa-miR-1207-3p_st     | 0.005  | 6.45E-01 | 0.970 | 5.33  | 5.33  | 5.33  | 0.054 |
| hp_hsa-mir-26a-2_st    | -0.006 | 6.46E-01 | 0.970 | 5.39  | 5.39  | 5.39  | 0.063 |
| hsa-miR-27b-star_st    | 0.034  | 6.46E-01 | 0.970 | 6.17  | 6.13  | 6.15  | 0.369 |
| hp_hsa-mir-1252_st     | 0.005  | 6.47E-01 | 0.970 | 5.45  | 5.44  | 5.45  | 0.051 |
| hsa-miR-220a_st        | 0.005  | 6.47E-01 | 0.970 | 5.35  | 5.35  | 5.35  | 0.058 |
| hp_hsa-mir-639_st      | 0.008  | 6.47E-01 | 0.970 | 5.58  | 5.57  | 5.57  | 0.089 |
| hp_hsa-mir-4286_st     | -0.006 | 6.47E-01 | 0.970 | 5.43  | 5.44  | 5.44  | 0.064 |
| hp_hsa-mir-512-2_s_st  | 0.006  | 6.47E-01 | 0.970 | 5.53  | 5.52  | 5.52  | 0.069 |
| hsa-miR-1226-star_st   | 0.026  | 6.47E-01 | 0.970 | 6.26  | 6.24  | 6.25  | 0.277 |
| hsa-miR-765_st         | 0.015  | 6.47E-01 | 0.970 | 5.69  | 5.68  | 5.68  | 0.165 |
| hp_hsa-mir-548k_st     | -0.005 | 6.48E-01 | 0.970 | 5.33  | 5.34  | 5.33  | 0.053 |
| hsa-miR-936_st         | -0.019 | 6.48E-01 | 0.970 | 6.03  | 6.05  | 6.04  | 0.207 |
| hp_hsa-mir-612_st      | -0.012 | 6.49E-01 | 0.970 | 5.89  | 5.90  | 5.89  | 0.133 |
| hp_hsa-mir-4317_st     | 0.006  | 6.49E-01 | 0.970 | 5.45  | 5.44  | 5.44  | 0.066 |
| hsa-miR-577_st         | 0.005  | 6.50E-01 | 0.970 | 5.30  | 5.30  | 5.30  | 0.052 |
| hp_hsa-mir-644_st      | -0.004 | 6.50E-01 | 0.970 | 5.31  | 5.32  | 5.31  | 0.046 |
| hsa-miR-3116_st        | 0.006  | 6.50E-01 | 0.970 | 5.35  | 5.35  | 5.35  | 0.064 |
| hsa-miR-549_st         | 0.005  | 6.51E-01 | 0.971 | 5.37  | 5.36  | 5.36  | 0.052 |
| hsa-miR-483-3p_st      | -0.009 | 6.51E-01 | 0.971 | 5.56  | 5.57  | 5.57  | 0.100 |
| hsa-miR-185-star_st    | -0.006 | 6.53E-01 | 0.971 | 5.49  | 5.50  | 5.49  | 0.066 |
| hsa-miR-1305_st        | -0.005 | 6.53E-01 | 0.971 | 5.41  | 5.41  | 5.41  | 0.056 |
| hsa-miR-618_st         | 0.005  | 6.53E-01 | 0.971 | 5.31  | 5.30  | 5.30  | 0.049 |
| hsa-miR-99a-star_st    | 0.010  | 6.54E-01 | 0.971 | 5.55  | 5.54  | 5.54  | 0.110 |
| hp_hsa-mir-671_st      | 0.006  | 6.55E-01 | 0.971 | 5.52  | 5.52  | 5.52  | 0.063 |
| hp_hsa-mir-720_st      | -0.006 | 6.56E-01 | 0.971 | 5.47  | 5.48  | 5.47  | 0.067 |
| hsa-miR-24_st          | 0.033  | 6.56E-01 | 0.971 | 13.21 | 13.18 | 13.20 | 0.364 |
| hsa-miR-671-5p_st      | -0.029 | 6.57E-01 | 0.971 | 7.17  | 7.20  | 7.19  | 0.318 |
| hp_hsa-mir-548a-3_x_st | -0.007 | 6.58E-01 | 0.971 | 5.45  | 5.46  | 5.45  | 0.081 |

|                       |        |          |       |      |      |      |       |
|-----------------------|--------|----------|-------|------|------|------|-------|
| hp_hsa-mir-3167_x_st  | 0.006  | 6.59E-01 | 0.971 | 5.48 | 5.48 | 5.48 | 0.061 |
| hp_hsa-mir-4305_st    | -0.005 | 6.59E-01 | 0.971 | 5.39 | 5.40 | 5.40 | 0.053 |
| hsa-miR-222-star_st   | 0.007  | 6.59E-01 | 0.971 | 5.50 | 5.50 | 5.50 | 0.073 |
| hp_hsa-mir-326_st     | -0.026 | 6.60E-01 | 0.971 | 6.43 | 6.46 | 6.45 | 0.291 |
| hsa-miR-516a-5p_st    | 0.005  | 6.60E-01 | 0.971 | 5.33 | 5.32 | 5.32 | 0.052 |
| hp_hsa-mir-527_x_st   | -0.005 | 6.60E-01 | 0.971 | 5.38 | 5.38 | 5.38 | 0.053 |
| hsa-miR-4314_st       | 0.012  | 6.61E-01 | 0.971 | 5.63 | 5.62 | 5.63 | 0.133 |
| hsa-miR-452_st        | 0.024  | 6.61E-01 | 0.971 | 5.72 | 5.70 | 5.71 | 0.266 |
| hsa-miR-542-3p_st     | -0.008 | 6.61E-01 | 0.971 | 5.52 | 5.53 | 5.53 | 0.086 |
| hsa-miR-323b-5p_st    | 0.005  | 6.61E-01 | 0.971 | 5.36 | 5.36 | 5.36 | 0.060 |
| hp_hsa-mir-361_st     | 0.013  | 6.61E-01 | 0.971 | 6.47 | 6.45 | 6.46 | 0.147 |
| hp_hsa-mir-103-2_s_st | 0.007  | 6.62E-01 | 0.971 | 5.46 | 5.46 | 5.46 | 0.076 |
| hp_hsa-mir-1246_st    | -0.012 | 6.63E-01 | 0.971 | 5.82 | 5.84 | 5.83 | 0.131 |
| hp_hsa-mir-221_st     | 0.007  | 6.64E-01 | 0.971 | 5.56 | 5.55 | 5.55 | 0.085 |
| hsa-miR-3153_st       | -0.013 | 6.64E-01 | 0.971 | 5.73 | 5.74 | 5.74 | 0.145 |
| hp_hsa-mir-3190_s_st  | -0.008 | 6.64E-01 | 0.971 | 5.52 | 5.52 | 5.52 | 0.086 |
| hsa-miR-513a-5p_st    | -0.021 | 6.64E-01 | 0.971 | 6.10 | 6.12 | 6.11 | 0.241 |
| hp_hsa-mir-610_x_st   | -0.005 | 6.66E-01 | 0.971 | 5.41 | 5.42 | 5.42 | 0.054 |
| hp_hsa-mir-301b_st    | 0.003  | 6.67E-01 | 0.971 | 5.31 | 5.31 | 5.31 | 0.039 |
| hp_hsa-mir-30c-1_st   | -0.006 | 6.68E-01 | 0.971 | 5.49 | 5.50 | 5.49 | 0.068 |
| hsa-miR-3174_st       | -0.006 | 6.69E-01 | 0.971 | 5.49 | 5.49 | 5.49 | 0.068 |
| hsa-miR-150_st        | 0.083  | 6.69E-01 | 0.971 | 8.82 | 8.74 | 8.78 | 0.957 |
| hp_hsa-mir-16-2_x_st  | 0.010  | 6.69E-01 | 0.971 | 6.09 | 6.08 | 6.08 | 0.111 |
| hp_hsa-mir-1255a_x_st | -0.004 | 6.71E-01 | 0.971 | 5.33 | 5.33 | 5.33 | 0.046 |
| hsa-miR-19b_st        | 0.065  | 6.71E-01 | 0.971 | 8.11 | 8.05 | 8.08 | 0.758 |
| hp_hsa-mir-663b_st    | -0.019 | 6.71E-01 | 0.971 | 6.15 | 6.17 | 6.16 | 0.218 |
| hp_hsa-mir-374b_x_st  | 0.005  | 6.71E-01 | 0.971 | 5.34 | 5.34 | 5.34 | 0.062 |
| hp_hsa-mir-606_st     | -0.005 | 6.71E-01 | 0.971 | 5.40 | 5.40 | 5.40 | 0.061 |
| hp_hsa-mir-4330_st    | 0.008  | 6.72E-01 | 0.971 | 5.53 | 5.52 | 5.53 | 0.088 |
| hsa-miR-29b-1-star_st | -0.037 | 6.72E-01 | 0.971 | 6.16 | 6.19 | 6.18 | 0.428 |
| hp_hsa-mir-324_st     | -0.007 | 6.72E-01 | 0.971 | 5.85 | 5.86 | 5.85 | 0.084 |
| hsa-miR-182-star_st   | 0.005  | 6.73E-01 | 0.971 | 5.36 | 5.35 | 5.35 | 0.060 |
| hp_hsa-mir-1201_s_st  | -0.020 | 6.73E-01 | 0.971 | 6.03 | 6.05 | 6.04 | 0.231 |
| hp_hsa-mir-942_st     | -0.005 | 6.74E-01 | 0.971 | 5.35 | 5.35 | 5.35 | 0.052 |
| hsa-miR-517-star_st   | 0.005  | 6.75E-01 | 0.971 | 5.32 | 5.32 | 5.32 | 0.054 |
| hp_hsa-mir-4253_x_st  | -0.006 | 6.75E-01 | 0.971 | 5.55 | 5.56 | 5.56 | 0.076 |
| hsa-miR-641_st        | -0.006 | 6.75E-01 | 0.971 | 5.39 | 5.39 | 5.39 | 0.067 |
| hsa-miR-135b-star_st  | 0.013  | 6.78E-01 | 0.971 | 5.62 | 5.61 | 5.61 | 0.150 |
| hp_hsa-mir-609_x_st   | 0.006  | 6.78E-01 | 0.971 | 5.43 | 5.42 | 5.42 | 0.069 |
| hp_hsa-mir-643_st     | -0.006 | 6.79E-01 | 0.971 | 5.51 | 5.52 | 5.51 | 0.070 |
| hp_hsa-mir-581_st     | 0.005  | 6.79E-01 | 0.971 | 5.41 | 5.41 | 5.41 | 0.063 |
| hsa-miR-26a-2-star_st | 0.005  | 6.80E-01 | 0.971 | 5.38 | 5.38 | 5.38 | 0.063 |
| hsa-miR-216b_st       | -0.008 | 6.80E-01 | 0.971 | 5.58 | 5.59 | 5.58 | 0.094 |
| hp_hsa-mir-4328_st    | 0.005  | 6.80E-01 | 0.971 | 5.37 | 5.37 | 5.37 | 0.061 |
| hsa-miR-563_st        | 0.009  | 6.81E-01 | 0.971 | 5.55 | 5.54 | 5.54 | 0.111 |
| hsa-miR-4309_st       | 0.005  | 6.81E-01 | 0.971 | 5.33 | 5.32 | 5.33 | 0.055 |
| hp_hsa-mir-508_st     | -0.004 | 6.81E-01 | 0.971 | 5.34 | 5.35 | 5.34 | 0.051 |

|                       |        |          |       |      |      |      |       |
|-----------------------|--------|----------|-------|------|------|------|-------|
| hsa-miR-141-star_st   | 0.004  | 6.81E-01 | 0.971 | 5.29 | 5.28 | 5.29 | 0.046 |
| hsa-miR-613_st        | -0.005 | 6.82E-01 | 0.971 | 5.33 | 5.34 | 5.34 | 0.059 |
| hp_hsa-mir-761_x_st   | -0.005 | 6.83E-01 | 0.971 | 5.38 | 5.39 | 5.39 | 0.060 |
| hp_hsa-mir-525_x_st   | -0.016 | 6.83E-01 | 0.971 | 6.33 | 6.35 | 6.34 | 0.190 |
| hsa-miR-511_st        | 0.004  | 6.83E-01 | 0.971 | 5.25 | 5.25 | 5.25 | 0.052 |
| hp_hsa-mir-505_st     | 0.007  | 6.83E-01 | 0.971 | 5.50 | 5.49 | 5.50 | 0.083 |
| hsa-miR-150-star_st   | -0.033 | 6.84E-01 | 0.971 | 7.28 | 7.32 | 7.30 | 0.402 |
| hp_hsa-mir-548q_st    | -0.012 | 6.84E-01 | 0.971 | 5.71 | 5.72 | 5.71 | 0.141 |
| hp_hsa-mir-549_st     | -0.005 | 6.84E-01 | 0.971 | 5.37 | 5.38 | 5.38 | 0.054 |
| hp_hsa-mir-1181_st    | -0.018 | 6.85E-01 | 0.971 | 6.80 | 6.82 | 6.81 | 0.219 |
| hp_hsa-mir-548l_st    | -0.005 | 6.85E-01 | 0.971 | 5.38 | 5.39 | 5.38 | 0.060 |
| hsa-miR-3129_st       | -0.004 | 6.86E-01 | 0.971 | 5.32 | 5.32 | 5.32 | 0.051 |
| hsa-miR-3189_st       | 0.007  | 6.86E-01 | 0.971 | 5.46 | 5.45 | 5.46 | 0.084 |
| hsa-miR-1255b_st      | 0.006  | 6.86E-01 | 0.971 | 5.41 | 5.40 | 5.41 | 0.067 |
| hsa-miR-660_st        | -0.031 | 6.87E-01 | 0.971 | 6.59 | 6.62 | 6.61 | 0.372 |
| hsa-miR-148a-star_st  | -0.012 | 6.87E-01 | 0.971 | 5.50 | 5.51 | 5.51 | 0.148 |
| hp_hsa-mir-941-2_s_st | -0.014 | 6.88E-01 | 0.971 | 6.22 | 6.24 | 6.23 | 0.170 |
| hsa-miR-555_st        | -0.005 | 6.88E-01 | 0.971 | 5.31 | 5.32 | 5.32 | 0.055 |
| hp_hsa-mir-1973_st    | -0.013 | 6.88E-01 | 0.971 | 6.05 | 6.06 | 6.06 | 0.157 |
| hp_hsa-mir-631_x_st   | -0.006 | 6.88E-01 | 0.971 | 5.51 | 5.52 | 5.51 | 0.079 |
| hsa-miR-3164_st       | 0.009  | 6.89E-01 | 0.971 | 5.53 | 5.52 | 5.53 | 0.107 |
| hp_hsa-mir-593_st     | -0.009 | 6.90E-01 | 0.971 | 5.64 | 5.65 | 5.64 | 0.106 |
| hp_hsa-mir-103-1_s_st | -0.005 | 6.90E-01 | 0.971 | 5.32 | 5.33 | 5.33 | 0.056 |
| hsa-miR-4298_st       | 0.035  | 6.91E-01 | 0.971 | 8.29 | 8.26 | 8.27 | 0.427 |
| hsa-miR-4262_st       | -0.009 | 6.91E-01 | 0.971 | 5.29 | 5.30 | 5.29 | 0.110 |
| hsa-miR-302d_st       | 0.004  | 6.91E-01 | 0.971 | 5.30 | 5.29 | 5.29 | 0.054 |
| hp_hsa-mir-525_st     | -0.014 | 6.92E-01 | 0.971 | 6.47 | 6.48 | 6.47 | 0.175 |
| hp_hsa-mir-1224_st    | -0.023 | 6.92E-01 | 0.971 | 7.16 | 7.18 | 7.17 | 0.284 |
| hsa-miR-215_st        | 0.052  | 6.92E-01 | 0.971 | 6.15 | 6.10 | 6.12 | 0.649 |
| hsa-miR-367_st        | 0.004  | 6.93E-01 | 0.971 | 5.30 | 5.29 | 5.29 | 0.053 |
| hsa-miR-1281_st       | 0.042  | 6.93E-01 | 0.971 | 8.10 | 8.06 | 8.08 | 0.528 |
| hp_hsa-mir-153-2_st   | -0.004 | 6.94E-01 | 0.971 | 5.31 | 5.31 | 5.31 | 0.049 |
| hsa-miR-3161_st       | 0.005  | 6.94E-01 | 0.971 | 5.39 | 5.38 | 5.39 | 0.060 |
| hsa-miR-1207-5p_st    | -0.049 | 6.94E-01 | 0.971 | 9.82 | 9.87 | 9.84 | 0.609 |
| hp_hsa-mir-504_st     | 0.008  | 6.96E-01 | 0.971 | 5.74 | 5.73 | 5.73 | 0.100 |
| hp_hsa-mir-922_st     | 0.007  | 6.96E-01 | 0.971 | 5.55 | 5.54 | 5.54 | 0.086 |
| hp_hsa-mir-125b-1_st  | 0.006  | 6.97E-01 | 0.971 | 5.52 | 5.51 | 5.51 | 0.074 |
| hsa-miR-146b-3p_st    | -0.010 | 6.97E-01 | 0.971 | 5.47 | 5.48 | 5.48 | 0.130 |
| hsa-miR-136_st        | 0.004  | 6.98E-01 | 0.971 | 5.31 | 5.31 | 5.31 | 0.053 |
| hsa-miR-2053_st       | -0.004 | 6.98E-01 | 0.971 | 5.34 | 5.34 | 5.34 | 0.046 |
| hsa-miR-377_st        | -0.005 | 6.98E-01 | 0.971 | 5.36 | 5.36 | 5.36 | 0.057 |
| hp_hsa-mir-183_st     | -0.010 | 6.98E-01 | 0.971 | 5.64 | 5.65 | 5.64 | 0.127 |
| hsa-miR-3136_st       | 0.005  | 6.98E-01 | 0.971 | 5.50 | 5.49 | 5.49 | 0.068 |
| hp_hsa-mir-450a-2_st  | -0.004 | 6.99E-01 | 0.971 | 5.35 | 5.35 | 5.35 | 0.045 |
| hsa-miR-1208_st       | 0.012  | 6.99E-01 | 0.971 | 5.55 | 5.54 | 5.54 | 0.156 |
| hsa-miR-488_st        | -0.008 | 6.99E-01 | 0.971 | 5.42 | 5.43 | 5.42 | 0.098 |
| hsa-miR-135a-star_st  | -0.016 | 6.99E-01 | 0.971 | 6.14 | 6.16 | 6.15 | 0.206 |

|                        |        |          |       |      |      |      |       |
|------------------------|--------|----------|-------|------|------|------|-------|
| hsa-miR-1825_st        | 0.020  | 7.00E-01 | 0.971 | 6.44 | 6.43 | 6.44 | 0.255 |
| hp_hsa-mir-3158-2_s_st | 0.010  | 7.02E-01 | 0.971 | 5.68 | 5.67 | 5.67 | 0.123 |
| hp_hsa-mir-146b_x_st   | 0.006  | 7.02E-01 | 0.971 | 5.53 | 5.52 | 5.52 | 0.077 |
| hsa-miR-362-3p_st      | 0.004  | 7.03E-01 | 0.971 | 5.29 | 5.29 | 5.29 | 0.047 |
| hsa-miR-3158_st        | 0.005  | 7.03E-01 | 0.971 | 5.31 | 5.31 | 5.31 | 0.061 |
| hsa-miR-625-star_st    | 0.005  | 7.03E-01 | 0.971 | 5.43 | 5.42 | 5.42 | 0.070 |
| hsa-miR-1225-5p_st     | -0.045 | 7.04E-01 | 0.971 | 7.94 | 7.99 | 7.97 | 0.579 |
| hp_hsa-mir-1302-1_st   | 0.004  | 7.04E-01 | 0.971 | 5.32 | 5.32 | 5.32 | 0.053 |
| hp_hsa-mir-654_st      | -0.006 | 7.04E-01 | 0.971 | 5.48 | 5.48 | 5.48 | 0.075 |
| hp_hsa-mir-100_st      | -0.004 | 7.05E-01 | 0.971 | 5.34 | 5.35 | 5.34 | 0.051 |
| hsa-miR-140-5p_st      | 0.018  | 7.05E-01 | 0.971 | 5.75 | 5.73 | 5.74 | 0.228 |
| hsa-miR-3169_st        | -0.004 | 7.05E-01 | 0.971 | 5.39 | 5.40 | 5.40 | 0.054 |
| hsa-miR-4273_st        | -0.005 | 7.05E-01 | 0.971 | 5.36 | 5.37 | 5.37 | 0.070 |
| hsa-miR-2115_st        | -0.004 | 7.06E-01 | 0.971 | 5.28 | 5.28 | 5.28 | 0.057 |
| hp_hsa-mir-3123_st     | -0.010 | 7.07E-01 | 0.971 | 5.74 | 5.75 | 5.75 | 0.126 |
| hsa-miR-93-star_st     | -0.025 | 7.07E-01 | 0.971 | 6.23 | 6.26 | 6.25 | 0.324 |
| hsa-miR-553_st         | -0.004 | 7.08E-01 | 0.971 | 5.31 | 5.31 | 5.31 | 0.058 |
| hsa-miR-645_st         | -0.004 | 7.08E-01 | 0.971 | 5.27 | 5.28 | 5.28 | 0.049 |
| hp_hsa-mir-548f-3_x_st | 0.004  | 7.08E-01 | 0.971 | 5.39 | 5.39 | 5.39 | 0.058 |
| hp_hsa-mir-92a-2_st    | -0.006 | 7.08E-01 | 0.971 | 5.47 | 5.48 | 5.47 | 0.076 |
| hsa-miR-636_st         | 0.009  | 7.08E-01 | 0.971 | 5.56 | 5.55 | 5.55 | 0.113 |
| hsa-miR-938_st         | 0.005  | 7.09E-01 | 0.971 | 5.34 | 5.34 | 5.34 | 0.067 |
| hp_hsa-mir-369_st      | -0.005 | 7.09E-01 | 0.971 | 5.39 | 5.40 | 5.40 | 0.061 |
| hp_hsa-mir-185_x_st    | -0.007 | 7.09E-01 | 0.971 | 6.04 | 6.04 | 6.04 | 0.095 |
| hsa-miR-3170_st        | 0.005  | 7.09E-01 | 0.971 | 5.33 | 5.33 | 5.33 | 0.061 |
| hsa-miR-885-3p_st      | -0.057 | 7.09E-01 | 0.971 | 6.80 | 6.85 | 6.82 | 0.752 |
| hp_hsa-mir-18b_x_st    | 0.008  | 7.09E-01 | 0.971 | 5.57 | 5.56 | 5.57 | 0.099 |
| hp_hsa-mir-582_st      | 0.004  | 7.10E-01 | 0.971 | 5.39 | 5.39 | 5.39 | 0.052 |
| hsa-miR-1252_st        | 0.004  | 7.10E-01 | 0.971 | 5.32 | 5.31 | 5.32 | 0.050 |
| hp_hsa-mir-494_st      | 0.007  | 7.11E-01 | 0.971 | 5.83 | 5.82 | 5.82 | 0.096 |
| hsa-miR-218_st         | 0.004  | 7.11E-01 | 0.971 | 5.29 | 5.28 | 5.29 | 0.050 |
| hsa-miR-1270_st        | -0.006 | 7.11E-01 | 0.971 | 5.46 | 5.46 | 5.46 | 0.076 |
| hsa-miR-296-5p_st      | 0.006  | 7.12E-01 | 0.971 | 5.45 | 5.45 | 5.45 | 0.075 |
| hp_hsa-mir-137_st      | -0.004 | 7.13E-01 | 0.971 | 5.41 | 5.42 | 5.41 | 0.054 |
| hp_hsa-mir-1537_st     | 0.004  | 7.13E-01 | 0.971 | 5.34 | 5.33 | 5.33 | 0.049 |
| hsa-miR-591_st         | -0.004 | 7.14E-01 | 0.971 | 5.26 | 5.26 | 5.26 | 0.050 |
| hp_hsa-mir-4253_st     | -0.006 | 7.14E-01 | 0.971 | 5.60 | 5.60 | 5.60 | 0.076 |
| hsa-miR-526b_st        | 0.004  | 7.14E-01 | 0.971 | 5.32 | 5.31 | 5.32 | 0.054 |
| hp_hsa-mir-298_st      | 0.006  | 7.14E-01 | 0.971 | 5.44 | 5.44 | 5.44 | 0.074 |
| hp_hsa-mir-548u_x_st   | -0.007 | 7.14E-01 | 0.971 | 5.50 | 5.51 | 5.51 | 0.093 |
| hsa-miR-933_st         | -0.019 | 7.15E-01 | 0.971 | 7.25 | 7.26 | 7.25 | 0.262 |
| hsa-miR-934_st         | 0.007  | 7.15E-01 | 0.971 | 5.53 | 5.52 | 5.52 | 0.098 |
| hsa-miR-202_st         | -0.015 | 7.16E-01 | 0.971 | 5.79 | 5.80 | 5.79 | 0.201 |
| hp_hsa-mir-548f-1_st   | -0.009 | 7.17E-01 | 0.971 | 5.53 | 5.54 | 5.54 | 0.115 |
| hsa-let-7g-star_st     | 0.006  | 7.18E-01 | 0.971 | 5.45 | 5.45 | 5.45 | 0.081 |
| hp_hsa-mir-548t_st     | 0.004  | 7.18E-01 | 0.971 | 5.32 | 5.32 | 5.32 | 0.048 |
| hp_hsa-mir-1296_st     | 0.007  | 7.18E-01 | 0.971 | 5.70 | 5.69 | 5.69 | 0.089 |

|                        |        |          |       |       |       |       |       |
|------------------------|--------|----------|-------|-------|-------|-------|-------|
| hsa-miR-1231_st        | -0.041 | 7.19E-01 | 0.971 | 6.92  | 6.97  | 6.94  | 0.555 |
| hsa-miR-509-5p_st      | -0.007 | 7.19E-01 | 0.971 | 5.46  | 5.47  | 5.47  | 0.096 |
| hsa-miR-1248_st        | -0.004 | 7.19E-01 | 0.971 | 5.37  | 5.38  | 5.37  | 0.058 |
| hp_hsa-mir-199b_st     | 0.008  | 7.19E-01 | 0.971 | 5.71  | 5.70  | 5.71  | 0.110 |
| hp_hsa-mir-1180_st     | -0.007 | 7.20E-01 | 0.971 | 5.75  | 5.76  | 5.75  | 0.090 |
| hp_hsa-mir-220b_st     | -0.004 | 7.21E-01 | 0.971 | 5.37  | 5.37  | 5.37  | 0.057 |
| hp_hsa-mir-515-1_s_st  | -0.004 | 7.22E-01 | 0.971 | 5.39  | 5.39  | 5.39  | 0.056 |
| hsa-miR-639_st         | 0.018  | 7.23E-01 | 0.971 | 5.73  | 5.72  | 5.73  | 0.244 |
| hsa-miR-505_st         | -0.014 | 7.23E-01 | 0.971 | 5.60  | 5.61  | 5.60  | 0.189 |
| hsa-miR-509-3-5p_st    | 0.009  | 7.23E-01 | 0.971 | 5.57  | 5.56  | 5.56  | 0.130 |
| hsa-miR-655_st         | 0.005  | 7.23E-01 | 0.971 | 5.31  | 5.30  | 5.30  | 0.065 |
| hp_hsa-mir-3165_x_st   | -0.004 | 7.24E-01 | 0.971 | 5.37  | 5.38  | 5.37  | 0.049 |
| hsa-miR-1246_st        | -0.061 | 7.24E-01 | 0.971 | 8.83  | 8.89  | 8.86  | 0.846 |
| hsa-miR-1178_st        | 0.004  | 7.25E-01 | 0.971 | 5.29  | 5.29  | 5.29  | 0.052 |
| hsa-miR-3125_st        | 0.005  | 7.26E-01 | 0.971 | 5.39  | 5.38  | 5.39  | 0.074 |
| hsa-miR-450a_st        | -0.004 | 7.26E-01 | 0.971 | 5.31  | 5.32  | 5.32  | 0.056 |
| hsa-miR-516b-star_st   | -0.004 | 7.26E-01 | 0.971 | 5.33  | 5.33  | 5.33  | 0.058 |
| hp_hsa-mir-1238_st     | -0.013 | 7.27E-01 | 0.971 | 6.00  | 6.01  | 6.01  | 0.178 |
| hsa-miR-4260_st        | -0.010 | 7.27E-01 | 0.971 | 5.81  | 5.82  | 5.81  | 0.139 |
| hsa-miR-4293_st        | -0.006 | 7.27E-01 | 0.971 | 5.45  | 5.46  | 5.45  | 0.086 |
| hsa-miR-20b-star_st    | 0.006  | 7.28E-01 | 0.971 | 5.57  | 5.56  | 5.56  | 0.088 |
| hp_hsa-mir-658_st      | 0.015  | 7.28E-01 | 0.971 | 6.17  | 6.16  | 6.16  | 0.209 |
| hsa-miR-4324_st        | 0.006  | 7.28E-01 | 0.971 | 5.43  | 5.43  | 5.43  | 0.090 |
| hsa-miR-1182_st        | 0.014  | 7.28E-01 | 0.971 | 5.86  | 5.85  | 5.85  | 0.200 |
| hsa-miR-522_st         | -0.007 | 7.31E-01 | 0.971 | 5.43  | 5.44  | 5.43  | 0.097 |
| hp_hsa-mir-634_st      | 0.005  | 7.31E-01 | 0.971 | 5.54  | 5.53  | 5.54  | 0.068 |
| hp_hsa-mir-450a-1_st   | -0.004 | 7.31E-01 | 0.971 | 5.39  | 5.40  | 5.40  | 0.061 |
| hsa-miR-4299_st        | -0.039 | 7.32E-01 | 0.971 | 7.43  | 7.47  | 7.45  | 0.554 |
| hsa-miR-3123_st        | -0.004 | 7.32E-01 | 0.971 | 5.26  | 5.26  | 5.26  | 0.055 |
| hp_hsa-mir-1278_x_st   | -0.005 | 7.32E-01 | 0.971 | 5.39  | 5.40  | 5.39  | 0.071 |
| hp_hsa-mir-3172_st     | -0.010 | 7.33E-01 | 0.971 | 6.08  | 6.09  | 6.08  | 0.148 |
| hsa-miR-3190-3p_st     | -0.010 | 7.34E-01 | 0.971 | 5.60  | 5.61  | 5.60  | 0.145 |
| hp_hsa-mir-3175_st     | -0.007 | 7.34E-01 | 0.971 | 5.73  | 5.74  | 5.73  | 0.101 |
| hp_hsa-mir-1302-2_s_st | -0.004 | 7.34E-01 | 0.971 | 5.37  | 5.38  | 5.37  | 0.052 |
| hsa-miR-3193_st        | -0.004 | 7.35E-01 | 0.971 | 5.36  | 5.36  | 5.36  | 0.065 |
| hp_hsa-mir-4262_st     | 0.008  | 7.36E-01 | 0.971 | 5.58  | 5.58  | 5.58  | 0.114 |
| hsa-miR-557_st         | 0.013  | 7.36E-01 | 0.971 | 5.81  | 5.80  | 5.80  | 0.190 |
| hp_hsa-mir-513a-2_s_st | 0.003  | 7.36E-01 | 0.971 | 5.31  | 5.30  | 5.30  | 0.048 |
| hsa-miR-145_st         | 0.053  | 7.36E-01 | 0.971 | 13.32 | 13.27 | 13.29 | 0.767 |
| hsa-miR-25_st          | 0.040  | 7.36E-01 | 0.971 | 8.64  | 8.60  | 8.62  | 0.591 |
| hsa-miR-302b-star_st   | 0.004  | 7.37E-01 | 0.971 | 5.36  | 5.35  | 5.35  | 0.051 |
| hsa-miR-939_st         | -0.039 | 7.37E-01 | 0.971 | 7.65  | 7.69  | 7.67  | 0.567 |
| hsa-miR-331-5p_st      | 0.012  | 7.37E-01 | 0.971 | 5.83  | 5.82  | 5.83  | 0.178 |
| hp_hsa-mir-492_st      | 0.005  | 7.38E-01 | 0.971 | 5.42  | 5.41  | 5.41  | 0.070 |
| hsa-miR-342-5p_st      | 0.031  | 7.38E-01 | 0.971 | 6.47  | 6.44  | 6.46  | 0.457 |
| hsa-miR-611_st         | -0.004 | 7.38E-01 | 0.971 | 5.40  | 5.40  | 5.40  | 0.064 |
| hp_hsa-mir-1285-2_x_st | -0.006 | 7.39E-01 | 0.971 | 5.75  | 5.75  | 5.75  | 0.095 |

|                        |        |          |       |      |      |      |       |
|------------------------|--------|----------|-------|------|------|------|-------|
| hp_hsa-mir-3183_st     | 0.005  | 7.39E-01 | 0.971 | 5.49 | 5.48 | 5.49 | 0.079 |
| hp_hsa-mir-1825_st     | -0.009 | 7.39E-01 | 0.971 | 5.72 | 5.72 | 5.72 | 0.128 |
| hp_hsa-mir-29b-2_x_st  | -0.005 | 7.39E-01 | 0.971 | 5.40 | 5.41 | 5.41 | 0.067 |
| hsa-miR-1269_st        | -0.017 | 7.39E-01 | 0.971 | 5.40 | 5.41 | 5.41 | 0.248 |
| hp_hsa-mir-640_st      | -0.006 | 7.40E-01 | 0.971 | 5.52 | 5.53 | 5.53 | 0.090 |
| hp_hsa-mir-941-3_s_st  | -0.011 | 7.40E-01 | 0.971 | 6.23 | 6.24 | 6.24 | 0.161 |
| hp_hsa-mir-199a-2_st   | -0.005 | 7.41E-01 | 0.971 | 5.47 | 5.47 | 5.47 | 0.071 |
| hp_hsa-mir-211_st      | -0.004 | 7.42E-01 | 0.972 | 5.51 | 5.51 | 5.51 | 0.062 |
| hp_hsa-mir-3158-1_s_st | 0.006  | 7.44E-01 | 0.973 | 5.46 | 5.46 | 5.46 | 0.085 |
| hp_hsa-mir-1286_st     | 0.004  | 7.44E-01 | 0.973 | 5.35 | 5.34 | 5.35 | 0.054 |
| hp_hsa-mir-611_st      | -0.008 | 7.46E-01 | 0.973 | 5.79 | 5.80 | 5.79 | 0.120 |
| hp_hsa-mir-216b_st     | -0.004 | 7.46E-01 | 0.973 | 5.39 | 5.39 | 5.39 | 0.054 |
| hp_hsa-mir-181b-1_x_st | -0.005 | 7.46E-01 | 0.973 | 5.43 | 5.44 | 5.44 | 0.070 |
| hp_hsa-mir-548b_x_st   | 0.003  | 7.47E-01 | 0.973 | 5.31 | 5.30 | 5.31 | 0.045 |
| hsa-miR-3180-5p_st     | 0.005  | 7.47E-01 | 0.973 | 5.47 | 5.46 | 5.47 | 0.076 |
| hsa-miR-3159_st        | 0.004  | 7.48E-01 | 0.973 | 5.34 | 5.34 | 5.34 | 0.055 |
| hp_hsa-mir-1274b_st    | -0.006 | 7.49E-01 | 0.973 | 5.54 | 5.54 | 5.54 | 0.088 |
| hp_hsa-mir-133a-2_st   | 0.004  | 7.49E-01 | 0.973 | 5.40 | 5.40 | 5.40 | 0.059 |
| hsa-miR-589-star_st    | -0.006 | 7.50E-01 | 0.973 | 5.51 | 5.51 | 5.51 | 0.089 |
| hp_hsa-mir-3166_x_st   | 0.004  | 7.50E-01 | 0.973 | 5.35 | 5.34 | 5.34 | 0.058 |
| hsa-miR-3190-5p_st     | 0.007  | 7.50E-01 | 0.973 | 5.50 | 5.50 | 5.50 | 0.110 |
| hp_hsa-mir-4327_st     | -0.005 | 7.51E-01 | 0.973 | 5.47 | 5.47 | 5.47 | 0.072 |
| hp_hsa-mir-3149_st     | 0.004  | 7.51E-01 | 0.973 | 5.35 | 5.35 | 5.35 | 0.068 |
| hsa-miR-4297_st        | 0.005  | 7.52E-01 | 0.973 | 5.41 | 5.41 | 5.41 | 0.072 |
| hp_hsa-mir-1298_st     | -0.005 | 7.52E-01 | 0.973 | 5.47 | 5.48 | 5.47 | 0.085 |
| hsa-miR-4265_st        | -0.004 | 7.53E-01 | 0.973 | 5.34 | 5.35 | 5.35 | 0.069 |
| hp_hsa-mir-943_st      | -0.010 | 7.53E-01 | 0.973 | 6.05 | 6.06 | 6.06 | 0.158 |
| hsa-miR-19b-2-star_st  | -0.003 | 7.53E-01 | 0.973 | 5.27 | 5.27 | 5.27 | 0.050 |
| hsa-miR-575_st         | 0.026  | 7.53E-01 | 0.973 | 6.45 | 6.42 | 6.44 | 0.404 |
| hp_hsa-mir-3150_x_st   | 0.006  | 7.54E-01 | 0.973 | 5.65 | 5.65 | 5.65 | 0.088 |
| hsa-miR-331-3p_st      | 0.023  | 7.54E-01 | 0.973 | 6.43 | 6.41 | 6.42 | 0.355 |
| hp_hsa-mir-204_st      | -0.006 | 7.54E-01 | 0.973 | 5.77 | 5.78 | 5.77 | 0.094 |
| hsa-miR-1234_st        | 0.009  | 7.54E-01 | 0.973 | 5.80 | 5.80 | 5.80 | 0.139 |
| hp_hsa-mir-1289-2_x_st | -0.006 | 7.54E-01 | 0.973 | 5.55 | 5.55 | 5.55 | 0.087 |
| hsa-miR-889_st         | 0.003  | 7.54E-01 | 0.973 | 5.31 | 5.31 | 5.31 | 0.052 |
| hp_hsa-mir-1208_st     | -0.009 | 7.55E-01 | 0.973 | 5.88 | 5.88 | 5.88 | 0.145 |
| hsa-miR-1911_st        | -0.008 | 7.55E-01 | 0.973 | 5.39 | 5.39 | 5.39 | 0.121 |
| hp_hsa-mir-7-3_st      | 0.004  | 7.55E-01 | 0.973 | 5.53 | 5.53 | 5.53 | 0.063 |
| hp_hsa-mir-4310_st     | 0.004  | 7.56E-01 | 0.973 | 5.51 | 5.51 | 5.51 | 0.068 |
| hp_hsa-mir-196a-1_st   | 0.004  | 7.57E-01 | 0.973 | 5.43 | 5.43 | 5.43 | 0.068 |
| hsa-miR-1914_st        | 0.004  | 7.58E-01 | 0.973 | 5.39 | 5.38 | 5.38 | 0.066 |
| hsa-miR-3134_st        | -0.004 | 7.58E-01 | 0.973 | 5.43 | 5.44 | 5.44 | 0.070 |
| hsa-miR-617_st         | 0.005  | 7.59E-01 | 0.973 | 5.42 | 5.41 | 5.41 | 0.081 |
| hsa-miR-205-star_st    | 0.004  | 7.60E-01 | 0.973 | 5.42 | 5.42 | 5.42 | 0.069 |
| hp_hsa-mir-129-2_x_st  | 0.005  | 7.60E-01 | 0.973 | 5.44 | 5.44 | 5.44 | 0.072 |
| hp_hsa-mir-3178_st     | -0.007 | 7.60E-01 | 0.973 | 6.01 | 6.02 | 6.02 | 0.114 |
| hp_hsa-mir-1245_st     | -0.004 | 7.61E-01 | 0.973 | 5.28 | 5.29 | 5.28 | 0.060 |



|                        |        |          |       |       |       |       |       |
|------------------------|--------|----------|-------|-------|-------|-------|-------|
| hsa-miR-510_st         | -0.009 | 7.61E-01 | 0.973 | 5.65  | 5.66  | 5.65  | 0.139 |
| hsa-miR-520b_st        | -0.004 | 7.62E-01 | 0.973 | 5.35  | 5.36  | 5.35  | 0.058 |
| hp_hsa-mir-548s_x_st   | -0.003 | 7.62E-01 | 0.973 | 5.31  | 5.31  | 5.31  | 0.047 |
| hsa-miR-4256_st        | -0.003 | 7.62E-01 | 0.973 | 5.31  | 5.31  | 5.31  | 0.049 |
| hp_hsa-mir-450a-1_x_st | -0.004 | 7.63E-01 | 0.973 | 5.45  | 5.45  | 5.45  | 0.066 |
| hp_hsa-mir-548h-1_st   | -0.003 | 7.63E-01 | 0.973 | 5.38  | 5.39  | 5.39  | 0.053 |
| hp_hsa-mir-4312_st     | -0.006 | 7.63E-01 | 0.973 | 5.55  | 5.55  | 5.55  | 0.094 |
| hp_hsa-mir-548g_st     | -0.007 | 7.63E-01 | 0.973 | 5.47  | 5.47  | 5.47  | 0.110 |
| hsa-miR-19b-1-star_st  | -0.004 | 7.65E-01 | 0.973 | 5.34  | 5.34  | 5.34  | 0.073 |
| hsa-miR-877-star_st    | -0.006 | 7.66E-01 | 0.973 | 5.52  | 5.53  | 5.53  | 0.103 |
| hsa-miR-499-3p_st      | 0.004  | 7.66E-01 | 0.973 | 5.34  | 5.34  | 5.34  | 0.062 |
| hp_hsa-mir-3173_st     | -0.004 | 7.67E-01 | 0.973 | 5.49  | 5.49  | 5.49  | 0.074 |
| hp_hsa-mir-1197_st     | 0.005  | 7.68E-01 | 0.973 | 5.42  | 5.41  | 5.41  | 0.090 |
| hp_hsa-mir-517b_x_st   | 0.003  | 7.69E-01 | 0.973 | 5.34  | 5.34  | 5.34  | 0.051 |
| hsa-miR-301a_st        | 0.005  | 7.69E-01 | 0.973 | 5.36  | 5.35  | 5.35  | 0.084 |
| hp_hsa-mir-590_st      | -0.003 | 7.70E-01 | 0.973 | 5.34  | 5.34  | 5.34  | 0.050 |
| hsa-miR-890_st         | -0.008 | 7.70E-01 | 0.973 | 5.52  | 5.53  | 5.53  | 0.137 |
| hsa-miR-4281_st        | -0.038 | 7.70E-01 | 0.973 | 11.13 | 11.16 | 11.15 | 0.645 |
| hsa-miR-495_st         | -0.005 | 7.70E-01 | 0.973 | 5.39  | 5.39  | 5.39  | 0.081 |
| hsa-miR-188-3p_st      | -0.004 | 7.71E-01 | 0.973 | 5.36  | 5.36  | 5.36  | 0.058 |
| hp_hsa-mir-33b_st      | -0.009 | 7.71E-01 | 0.973 | 5.99  | 6.00  | 6.00  | 0.148 |
| hp_hsa-mir-220b_s_st   | -0.005 | 7.71E-01 | 0.973 | 5.59  | 5.60  | 5.59  | 0.084 |
| hp_hsa-mir-637_st      | -0.005 | 7.71E-01 | 0.973 | 5.58  | 5.58  | 5.58  | 0.084 |
| hp_hsa-mir-320e_x_st   | -0.011 | 7.72E-01 | 0.973 | 6.26  | 6.27  | 6.26  | 0.182 |
| hp_hsa-mir-153-2_x_st  | -0.003 | 7.72E-01 | 0.973 | 5.36  | 5.36  | 5.36  | 0.056 |
| hsa-miR-520c-5p_st     | -0.004 | 7.72E-01 | 0.973 | 5.41  | 5.42  | 5.42  | 0.073 |
| hsa-miR-1279_st        | 0.004  | 7.73E-01 | 0.973 | 5.33  | 5.33  | 5.33  | 0.059 |
| hp_hsa-mir-769_st      | -0.005 | 7.73E-01 | 0.973 | 5.67  | 5.67  | 5.67  | 0.088 |
| hp_hsa-mir-873_st      | 0.004  | 7.73E-01 | 0.973 | 5.42  | 5.41  | 5.41  | 0.067 |
| hp_hsa-mir-1185-1_s_st | 0.007  | 7.73E-01 | 0.973 | 6.15  | 6.15  | 6.15  | 0.116 |
| hsa-miR-1537_st        | 0.003  | 7.74E-01 | 0.973 | 5.32  | 5.31  | 5.32  | 0.049 |
| hp_hsa-mir-18b_st      | 0.003  | 7.74E-01 | 0.973 | 5.39  | 5.38  | 5.38  | 0.055 |
| hsa-miR-3155_st        | -0.004 | 7.74E-01 | 0.973 | 5.47  | 5.48  | 5.48  | 0.077 |
| hsa-miR-1468_st        | -0.007 | 7.75E-01 | 0.973 | 5.51  | 5.52  | 5.51  | 0.125 |
| hsa-miR-3156_st        | -0.017 | 7.76E-01 | 0.973 | 6.68  | 6.70  | 6.69  | 0.299 |
| hsa-miR-7-1-star_st    | -0.006 | 7.76E-01 | 0.973 | 5.48  | 5.48  | 5.48  | 0.098 |
| hsa-miR-1280_st        | -0.033 | 7.76E-01 | 0.973 | 9.57  | 9.61  | 9.59  | 0.581 |
| hp_hsa-mir-4287_st     | 0.007  | 7.76E-01 | 0.973 | 6.26  | 6.25  | 6.26  | 0.128 |
| hp_hsa-mir-32_st       | -0.005 | 7.77E-01 | 0.973 | 5.47  | 5.47  | 5.47  | 0.083 |
| hsa-miR-19a_st         | -0.008 | 7.78E-01 | 0.973 | 5.54  | 5.55  | 5.55  | 0.136 |
| hsa-miR-532-3p_st      | -0.024 | 7.78E-01 | 0.973 | 6.84  | 6.87  | 6.86  | 0.415 |
| hp_hsa-mir-4289_st     | -0.004 | 7.79E-01 | 0.973 | 5.53  | 5.53  | 5.53  | 0.074 |
| hsa-miR-383_st         | -0.005 | 7.80E-01 | 0.973 | 5.45  | 5.46  | 5.45  | 0.092 |
| hp_hsa-mir-561_x_st    | -0.003 | 7.80E-01 | 0.973 | 5.42  | 5.42  | 5.42  | 0.056 |
| hp_hsa-mir-523_st      | 0.003  | 7.80E-01 | 0.973 | 5.36  | 5.36  | 5.36  | 0.058 |
| hsa-miR-135b_st        | 0.003  | 7.80E-01 | 0.973 | 5.30  | 5.29  | 5.29  | 0.055 |
| hp_hsa-mir-548b_st     | -0.003 | 7.82E-01 | 0.973 | 5.35  | 5.35  | 5.35  | 0.048 |

|                        |        |          |       |       |       |       |       |
|------------------------|--------|----------|-------|-------|-------|-------|-------|
| hp_hsa-mir-4270_st     | -0.011 | 7.82E-01 | 0.973 | 6.32  | 6.33  | 6.33  | 0.194 |
| hsa-miR-15b-star_st    | -0.003 | 7.82E-01 | 0.973 | 5.29  | 5.29  | 5.29  | 0.053 |
| hsa-miR-1973_st        | 0.024  | 7.82E-01 | 0.973 | 7.21  | 7.19  | 7.20  | 0.427 |
| hsa-miR-764_st         | 0.005  | 7.82E-01 | 0.973 | 5.40  | 5.40  | 5.40  | 0.081 |
| hp_hsa-mir-4309_st     | -0.003 | 7.82E-01 | 0.973 | 5.41  | 5.41  | 5.41  | 0.059 |
| hp_hsa-mir-544b_st     | -0.004 | 7.84E-01 | 0.973 | 5.31  | 5.31  | 5.31  | 0.065 |
| hp_hsa-mir-628_st      | -0.005 | 7.84E-01 | 0.973 | 5.63  | 5.63  | 5.63  | 0.085 |
| hsa-miR-216a_st        | -0.005 | 7.84E-01 | 0.973 | 5.47  | 5.47  | 5.47  | 0.087 |
| hp_hsa-mir-3119-1_s_st | 0.003  | 7.84E-01 | 0.973 | 5.36  | 5.36  | 5.36  | 0.054 |
| hp_hsa-mir-548v_st     | -0.003 | 7.86E-01 | 0.974 | 5.32  | 5.33  | 5.33  | 0.047 |
| hp_hsa-mir-365-1_x_st  | 0.005  | 7.86E-01 | 0.974 | 5.54  | 5.54  | 5.54  | 0.089 |
| hsa-miR-524-5p_st      | 0.004  | 7.86E-01 | 0.974 | 5.41  | 5.40  | 5.41  | 0.078 |
| hp_hsa-mir-148b_st     | -0.003 | 7.87E-01 | 0.974 | 5.40  | 5.40  | 5.40  | 0.054 |
| hp_hsa-mir-365-1_st    | 0.005  | 7.88E-01 | 0.974 | 5.59  | 5.58  | 5.58  | 0.100 |
| hsa-miR-204_st         | -0.007 | 7.88E-01 | 0.974 | 5.37  | 5.37  | 5.37  | 0.128 |
| hsa-miR-151-5p_st      | 0.024  | 7.88E-01 | 0.974 | 10.80 | 10.78 | 10.79 | 0.436 |
| hp_hsa-mir-340_st      | 0.003  | 7.90E-01 | 0.974 | 5.34  | 5.34  | 5.34  | 0.057 |
| hsa-miR-384_st         | 0.003  | 7.90E-01 | 0.974 | 5.32  | 5.32  | 5.32  | 0.058 |
| hsa-miR-335-star_st    | -0.004 | 7.91E-01 | 0.974 | 5.35  | 5.35  | 5.35  | 0.065 |
| hp_hsa-mir-3189_st     | 0.004  | 7.91E-01 | 0.974 | 5.51  | 5.51  | 5.51  | 0.066 |
| hsa-miR-4286_st        | -0.042 | 7.91E-01 | 0.974 | 8.74  | 8.79  | 8.76  | 0.780 |
| hp_hsa-mir-365-2_st    | -0.004 | 7.92E-01 | 0.974 | 5.49  | 5.49  | 5.49  | 0.067 |
| hp_hsa-mir-548n_x_st   | -0.004 | 7.92E-01 | 0.974 | 5.49  | 5.50  | 5.50  | 0.080 |
| hp_hsa-mir-659_st      | 0.003  | 7.92E-01 | 0.974 | 5.37  | 5.37  | 5.37  | 0.051 |
| hsa-miR-205_st         | -0.011 | 7.92E-01 | 0.974 | 5.38  | 5.39  | 5.39  | 0.196 |
| hp_hsa-mir-1261_st     | 0.004  | 7.94E-01 | 0.975 | 5.46  | 5.45  | 5.46  | 0.066 |
| hsa-miR-1302_st        | -0.003 | 7.96E-01 | 0.975 | 5.32  | 5.32  | 5.32  | 0.055 |
| hp_hsa-mir-548i-3_x_st | 0.003  | 7.96E-01 | 0.975 | 5.35  | 5.34  | 5.35  | 0.049 |
| hp_hsa-mir-587_st      | -0.003 | 7.97E-01 | 0.975 | 5.53  | 5.53  | 5.53  | 0.059 |
| hsa-miR-4289_st        | -0.003 | 7.97E-01 | 0.975 | 5.38  | 5.39  | 5.39  | 0.065 |
| hp_hsa-mir-1250_st     | -0.003 | 7.98E-01 | 0.975 | 5.45  | 5.46  | 5.46  | 0.061 |
| hp_hsa-mir-511-1_s_st  | -0.003 | 7.98E-01 | 0.975 | 5.37  | 5.38  | 5.37  | 0.053 |
| hp_hsa-mir-95_st       | -0.004 | 7.98E-01 | 0.975 | 5.45  | 5.46  | 5.45  | 0.074 |
| hsa-miR-606_st         | -0.004 | 7.99E-01 | 0.975 | 5.44  | 5.44  | 5.44  | 0.078 |
| hsa-miR-664_st         | 0.005  | 8.00E-01 | 0.975 | 5.56  | 5.55  | 5.56  | 0.093 |
| hsa-miR-484_st         | 0.008  | 8.00E-01 | 0.975 | 5.73  | 5.72  | 5.73  | 0.147 |
| hsa-miR-548b-5p_st     | 0.003  | 8.02E-01 | 0.975 | 5.31  | 5.31  | 5.31  | 0.057 |
| hsa-miR-106b-star_st   | 0.024  | 8.02E-01 | 0.975 | 7.45  | 7.42  | 7.44  | 0.464 |
| hp_hsa-mir-596_st      | -0.006 | 8.02E-01 | 0.975 | 5.60  | 5.61  | 5.60  | 0.113 |
| hsa-miR-486-3p_st      | 0.011  | 8.03E-01 | 0.975 | 5.64  | 5.63  | 5.63  | 0.217 |
| hsa-miR-363-star_st    | 0.004  | 8.03E-01 | 0.975 | 5.41  | 5.40  | 5.41  | 0.075 |
| hsa-miR-129-5p_st      | -0.015 | 8.04E-01 | 0.975 | 5.82  | 5.84  | 5.83  | 0.301 |
| hsa-miR-27a_st         | 0.030  | 8.04E-01 | 0.975 | 10.48 | 10.45 | 10.46 | 0.597 |
| hsa-miR-2110_st        | 0.012  | 8.04E-01 | 0.975 | 6.49  | 6.48  | 6.48  | 0.238 |
| hp_hsa-mir-133a-1_x_st | -0.003 | 8.05E-01 | 0.975 | 5.36  | 5.36  | 5.36  | 0.055 |
| hsa-miR-4317_st        | 0.006  | 8.05E-01 | 0.975 | 5.95  | 5.94  | 5.94  | 0.119 |
| hp_hsa-mir-603_st      | -0.003 | 8.05E-01 | 0.975 | 5.39  | 5.39  | 5.39  | 0.063 |

|                        |        |          |       |       |       |       |       |
|------------------------|--------|----------|-------|-------|-------|-------|-------|
| hsa-miR-615-5p_st      | 0.006  | 8.05E-01 | 0.975 | 5.54  | 5.54  | 5.54  | 0.125 |
| hsa-miR-454_st         | 0.006  | 8.06E-01 | 0.975 | 5.43  | 5.42  | 5.42  | 0.111 |
| hsa-miR-523_st         | 0.003  | 8.07E-01 | 0.975 | 5.34  | 5.34  | 5.34  | 0.052 |
| hp_hsa-mir-3170_st     | -0.002 | 8.08E-01 | 0.975 | 5.37  | 5.37  | 5.37  | 0.046 |
| hsa-miR-1237_st        | 0.007  | 8.08E-01 | 0.975 | 5.78  | 5.77  | 5.78  | 0.150 |
| hsa-miR-566_st         | 0.003  | 8.08E-01 | 0.975 | 5.41  | 5.40  | 5.40  | 0.062 |
| hsa-miR-2113_st        | -0.003 | 8.09E-01 | 0.975 | 5.39  | 5.40  | 5.40  | 0.064 |
| hp_hsa-mir-1183_st     | 0.003  | 8.10E-01 | 0.975 | 5.42  | 5.42  | 5.42  | 0.056 |
| hsa-miR-339-5p_st      | 0.024  | 8.10E-01 | 0.975 | 6.98  | 6.95  | 6.97  | 0.490 |
| hp_hsa-mir-128-1_x_st  | -0.004 | 8.10E-01 | 0.975 | 5.65  | 5.65  | 5.65  | 0.091 |
| hsa-miR-656_st         | 0.003  | 8.10E-01 | 0.975 | 5.33  | 5.33  | 5.33  | 0.059 |
| hp_hsa-mir-576_st      | -0.003 | 8.10E-01 | 0.975 | 5.49  | 5.49  | 5.49  | 0.069 |
| hsa-miR-200a_st        | -0.039 | 8.10E-01 | 0.975 | 8.33  | 8.37  | 8.35  | 0.799 |
| hsa-miR-548n_st        | -0.002 | 8.10E-01 | 0.975 | 5.28  | 5.28  | 5.28  | 0.046 |
| hp_hsa-mir-193a_st     | 0.006  | 8.11E-01 | 0.975 | 6.35  | 6.35  | 6.35  | 0.129 |
| hp_hsa-mir-559_x_st    | 0.004  | 8.12E-01 | 0.975 | 5.49  | 5.48  | 5.48  | 0.084 |
| hp_hsa-mir-519e_st     | 0.003  | 8.12E-01 | 0.975 | 5.41  | 5.40  | 5.41  | 0.067 |
| hp_hsa-mir-1229_st     | -0.013 | 8.12E-01 | 0.975 | 6.63  | 6.64  | 6.63  | 0.272 |
| hsa-miR-1296_st        | 0.008  | 8.12E-01 | 0.975 | 5.87  | 5.86  | 5.86  | 0.159 |
| hp_hsa-mir-1206_st     | 0.002  | 8.12E-01 | 0.975 | 5.32  | 5.32  | 5.32  | 0.046 |
| hp_hsa-mir-1185-2_s_st | 0.006  | 8.12E-01 | 0.975 | 6.08  | 6.07  | 6.07  | 0.130 |
| hsa-miR-21-star_st     | -0.018 | 8.13E-01 | 0.975 | 6.99  | 7.01  | 7.00  | 0.366 |
| hp_hsa-mir-184_st      | -0.003 | 8.13E-01 | 0.975 | 5.39  | 5.39  | 5.39  | 0.068 |
| hp_hsa-mir-4321_st     | -0.006 | 8.13E-01 | 0.975 | 6.03  | 6.03  | 6.03  | 0.133 |
| hsa-miR-483-5p_st      | -0.045 | 8.13E-01 | 0.975 | 6.77  | 6.81  | 6.79  | 0.939 |
| hp_hsa-mir-891a_st     | -0.003 | 8.14E-01 | 0.975 | 5.40  | 5.40  | 5.40  | 0.069 |
| hp_hsa-mir-519d_x_st   | 0.003  | 8.15E-01 | 0.975 | 5.47  | 5.47  | 5.47  | 0.066 |
| hp_hsa-mir-519a-2_x_st | 0.002  | 8.15E-01 | 0.975 | 5.33  | 5.33  | 5.33  | 0.049 |
| hsa-miR-17-star_st     | -0.025 | 8.15E-01 | 0.975 | 6.67  | 6.69  | 6.68  | 0.523 |
| hp_hsa-mir-150_st      | -0.006 | 8.17E-01 | 0.975 | 5.90  | 5.90  | 5.90  | 0.122 |
| hp_hsa-mir-4283-2_s_st | -0.003 | 8.17E-01 | 0.975 | 5.36  | 5.36  | 5.36  | 0.054 |
| hsa-miR-761_st         | 0.003  | 8.17E-01 | 0.975 | 5.38  | 5.37  | 5.37  | 0.060 |
| hsa-miR-632_st         | 0.003  | 8.19E-01 | 0.975 | 5.37  | 5.37  | 5.37  | 0.055 |
| hp_hsa-mir-138-1_x_st  | 0.004  | 8.19E-01 | 0.975 | 5.76  | 5.76  | 5.76  | 0.092 |
| hsa-miR-659_st         | -0.007 | 8.19E-01 | 0.975 | 5.79  | 5.80  | 5.80  | 0.156 |
| hsa-miR-196a-star_st   | -0.003 | 8.19E-01 | 0.975 | 5.29  | 5.30  | 5.29  | 0.058 |
| hp_hsa-mir-483_st      | -0.009 | 8.20E-01 | 0.975 | 5.78  | 5.79  | 5.78  | 0.191 |
| hp_hsa-mir-1205_st     | -0.002 | 8.21E-01 | 0.975 | 5.33  | 5.33  | 5.33  | 0.052 |
| hp_hsa-mir-9-2_x_st    | 0.003  | 8.21E-01 | 0.975 | 5.34  | 5.34  | 5.34  | 0.056 |
| hsa-miR-4272_st        | -0.002 | 8.21E-01 | 0.975 | 5.30  | 5.30  | 5.30  | 0.052 |
| hp_hsa-mir-3156-2_x_st | 0.004  | 8.21E-01 | 0.975 | 5.51  | 5.51  | 5.51  | 0.078 |
| hp_hsa-mir-1256_st     | 0.002  | 8.21E-01 | 0.975 | 5.32  | 5.32  | 5.32  | 0.049 |
| hp_hsa-mir-548m_st     | 0.003  | 8.22E-01 | 0.975 | 5.36  | 5.36  | 5.36  | 0.058 |
| hp_hsa-mir-513a-1_s_st | 0.003  | 8.22E-01 | 0.975 | 5.42  | 5.41  | 5.42  | 0.057 |
| hp_hsa-mir-655_st      | 0.002  | 8.22E-01 | 0.975 | 5.34  | 5.34  | 5.34  | 0.048 |
| hp_hsa-mir-452_st      | 0.004  | 8.22E-01 | 0.975 | 5.46  | 5.45  | 5.45  | 0.086 |
| hsa-miR-4270_st        | 0.034  | 8.23E-01 | 0.975 | 11.05 | 11.01 | 11.03 | 0.738 |

|                        |        |          |       |      |      |      |       |
|------------------------|--------|----------|-------|------|------|------|-------|
| hp_hsa-mir-3199-1_s_st | -0.003 | 8.23E-01 | 0.975 | 5.39 | 5.39 | 5.39 | 0.056 |
| hp_hsa-mir-200b_st     | -0.010 | 8.24E-01 | 0.975 | 7.04 | 7.05 | 7.05 | 0.217 |
| hp_hsa-mir-1258_s_st   | 0.004  | 8.25E-01 | 0.975 | 5.48 | 5.47 | 5.47 | 0.080 |
| hsa-miR-449b_st        | 0.003  | 8.26E-01 | 0.976 | 5.38 | 5.38 | 5.38 | 0.066 |
| hsa-miR-1915-star_st   | -0.006 | 8.26E-01 | 0.976 | 5.53 | 5.54 | 5.54 | 0.124 |
| hsa-miR-4257_st        | 0.009  | 8.27E-01 | 0.976 | 5.93 | 5.92 | 5.93 | 0.207 |
| hp_hsa-mir-519d_st     | 0.002  | 8.28E-01 | 0.976 | 5.40 | 5.40 | 5.40 | 0.054 |
| hsa-miR-342-3p_st      | 0.028  | 8.28E-01 | 0.976 | 9.68 | 9.65 | 9.67 | 0.636 |
| hp_hsa-mir-518c_st     | 0.003  | 8.29E-01 | 0.976 | 5.48 | 5.48 | 5.48 | 0.063 |
| hp_hsa-let-7f-1_x_st   | 0.003  | 8.29E-01 | 0.976 | 5.61 | 5.61 | 5.61 | 0.079 |
| hp_hsa-mir-552_st      | 0.006  | 8.30E-01 | 0.977 | 5.50 | 5.49 | 5.50 | 0.137 |
| hsa-miR-34b_st         | -0.004 | 8.30E-01 | 0.977 | 5.53 | 5.54 | 5.53 | 0.083 |
| hsa-miR-323b-3p_st     | 0.004  | 8.31E-01 | 0.978 | 5.57 | 5.56 | 5.56 | 0.092 |
| hp_hsa-mir-3160-2_s_st | -0.003 | 8.32E-01 | 0.978 | 5.39 | 5.40 | 5.39 | 0.057 |
| hsa-miR-3151_st        | -0.007 | 8.33E-01 | 0.979 | 5.83 | 5.84 | 5.83 | 0.152 |
| hp_hsa-mir-3179-2_s_st | 0.003  | 8.34E-01 | 0.979 | 5.45 | 5.44 | 5.44 | 0.062 |
| hp_hsa-mir-3184_s_st   | -0.004 | 8.35E-01 | 0.980 | 5.57 | 5.57 | 5.57 | 0.083 |
| hsa-miR-892a_st        | 0.002  | 8.35E-01 | 0.980 | 5.29 | 5.29 | 5.29 | 0.057 |
| hp_hsa-mir-30c-2_st    | 0.003  | 8.36E-01 | 0.980 | 5.55 | 5.55 | 5.55 | 0.068 |
| hsa-miR-1259_st        | -0.002 | 8.37E-01 | 0.980 | 5.38 | 5.38 | 5.38 | 0.057 |
| hp_hsa-mir-147b_st     | 0.003  | 8.37E-01 | 0.980 | 5.34 | 5.34 | 5.34 | 0.061 |
| hp_hsa-mir-1279_st     | 0.002  | 8.39E-01 | 0.980 | 5.34 | 5.33 | 5.33 | 0.046 |
| hp_hsa-mir-220c_st     | 0.002  | 8.39E-01 | 0.980 | 5.45 | 5.45 | 5.45 | 0.058 |
| hsa-miR-551b-star_st   | 0.011  | 8.39E-01 | 0.980 | 6.52 | 6.51 | 6.51 | 0.258 |
| hp_hsa-mir-495_x_st    | 0.002  | 8.40E-01 | 0.980 | 5.30 | 5.30 | 5.30 | 0.049 |
| hp_hsa-mir-924_st      | 0.002  | 8.40E-01 | 0.980 | 5.35 | 5.35 | 5.35 | 0.049 |
| hp_hsa-mir-107_st      | -0.002 | 8.41E-01 | 0.980 | 5.38 | 5.38 | 5.38 | 0.059 |
| hsa-miR-1263_st        | -0.009 | 8.42E-01 | 0.980 | 5.90 | 5.91 | 5.91 | 0.233 |
| hp_hsa-mir-410_st      | 0.002  | 8.42E-01 | 0.980 | 5.32 | 5.32 | 5.32 | 0.049 |
| hp_hsa-mir-3202-1_s_st | -0.002 | 8.43E-01 | 0.980 | 5.31 | 5.32 | 5.32 | 0.051 |
| hp_hsa-mir-21_st       | 0.008  | 8.43E-01 | 0.980 | 6.15 | 6.15 | 6.15 | 0.197 |
| hp_hsa-mir-34b_st      | -0.002 | 8.44E-01 | 0.980 | 5.36 | 5.36 | 5.36 | 0.058 |
| hp_hsa-mir-133a-1_st   | -0.002 | 8.45E-01 | 0.980 | 5.30 | 5.30 | 5.30 | 0.053 |
| hp_hsa-mir-466_st      | -0.003 | 8.45E-01 | 0.980 | 5.41 | 5.41 | 5.41 | 0.073 |
| hsa-miR-208b_st        | 0.002  | 8.45E-01 | 0.980 | 5.35 | 5.35 | 5.35 | 0.056 |
| hp_hsa-mir-1272_st     | 0.002  | 8.46E-01 | 0.980 | 5.45 | 5.45 | 5.45 | 0.057 |
| hp_hsa-mir-3135_x_st   | 0.003  | 8.46E-01 | 0.980 | 5.54 | 5.53 | 5.54 | 0.076 |
| hsa-miR-1914-star_st   | -0.007 | 8.46E-01 | 0.980 | 5.93 | 5.94 | 5.94 | 0.182 |
| hsa-miR-16-2-star_st   | -0.006 | 8.46E-01 | 0.980 | 5.61 | 5.62 | 5.61 | 0.154 |
| hp_hsa-mir-548a-2_x_st | 0.004  | 8.47E-01 | 0.980 | 5.57 | 5.57 | 5.57 | 0.093 |
| hsa-miR-492_st         | -0.009 | 8.47E-01 | 0.980 | 5.61 | 5.62 | 5.62 | 0.228 |
| hp_hsa-mir-921_st      | 0.003  | 8.47E-01 | 0.980 | 5.43 | 5.43 | 5.43 | 0.066 |
| hp_hsa-mir-297_st      | -0.002 | 8.47E-01 | 0.980 | 5.35 | 5.35 | 5.35 | 0.053 |
| hp_hsa-mir-181d_st     | 0.003  | 8.48E-01 | 0.980 | 5.60 | 5.59 | 5.60 | 0.079 |
| hp_hsa-mir-1253_x_st   | -0.002 | 8.49E-01 | 0.980 | 5.37 | 5.37 | 5.37 | 0.061 |
| hp_hsa-mir-320c-1_x_st | -0.010 | 8.49E-01 | 0.980 | 6.81 | 6.82 | 6.81 | 0.246 |
| hp_hsa-mir-891b_st     | 0.003  | 8.49E-01 | 0.980 | 5.41 | 5.41 | 5.41 | 0.065 |

|                        |        |          |       |       |       |       |       |
|------------------------|--------|----------|-------|-------|-------|-------|-------|
| hp_hsa-mir-526a-2_st   | -0.002 | 8.49E-01 | 0.980 | 5.37  | 5.38  | 5.37  | 0.054 |
| hp_hsa-mir-759_st      | -0.003 | 8.49E-01 | 0.980 | 5.40  | 5.41  | 5.40  | 0.064 |
| hsa-miR-610_st         | 0.002  | 8.50E-01 | 0.980 | 5.36  | 5.36  | 5.36  | 0.059 |
| hsa-miR-3152_st        | 0.006  | 8.50E-01 | 0.980 | 5.66  | 5.66  | 5.66  | 0.166 |
| hp_hsa-mir-554_st      | 0.003  | 8.51E-01 | 0.981 | 5.42  | 5.42  | 5.42  | 0.066 |
| hp_hsa-mir-135a-1_st   | -0.003 | 8.53E-01 | 0.981 | 5.46  | 5.46  | 5.46  | 0.076 |
| hp_hsa-mir-29b-1_st    | -0.003 | 8.53E-01 | 0.981 | 5.39  | 5.39  | 5.39  | 0.073 |
| hp_hsa-mir-3156-3_x_st | 0.004  | 8.53E-01 | 0.981 | 5.50  | 5.49  | 5.50  | 0.099 |
| hsa-miR-519a-star_st   | 0.003  | 8.54E-01 | 0.981 | 5.36  | 5.36  | 5.36  | 0.072 |
| hp_hsa-mir-219-1_st    | 0.002  | 8.55E-01 | 0.981 | 5.44  | 5.43  | 5.43  | 0.066 |
| hsa-miR-141_st         | -0.024 | 8.55E-01 | 0.981 | 7.17  | 7.19  | 7.18  | 0.644 |
| hp_hsa-mir-550-1_s_st  | 0.003  | 8.55E-01 | 0.981 | 5.88  | 5.87  | 5.88  | 0.092 |
| hp_hsa-mir-4268_st     | 0.002  | 8.56E-01 | 0.981 | 5.38  | 5.38  | 5.38  | 0.055 |
| hsa-miR-221_st         | -0.022 | 8.56E-01 | 0.981 | 11.18 | 11.20 | 11.19 | 0.595 |
| hsa-miR-373-star_st    | -0.007 | 8.56E-01 | 0.981 | 5.65  | 5.65  | 5.65  | 0.187 |
| hsa-miR-766_st         | -0.005 | 8.58E-01 | 0.982 | 5.97  | 5.98  | 5.97  | 0.143 |
| hp_hsa-mir-4277_st     | 0.003  | 8.58E-01 | 0.982 | 5.46  | 5.45  | 5.46  | 0.071 |
| hp_hsa-mir-4260_st     | 0.003  | 8.58E-01 | 0.982 | 5.57  | 5.57  | 5.57  | 0.094 |
| hsa-miR-3195_st        | 0.012  | 8.59E-01 | 0.982 | 7.52  | 7.51  | 7.52  | 0.337 |
| hsa-miR-624-star_st    | 0.002  | 8.59E-01 | 0.982 | 5.38  | 5.37  | 5.38  | 0.065 |
| hsa-miR-33b-star_st    | -0.003 | 8.59E-01 | 0.982 | 5.64  | 5.65  | 5.65  | 0.083 |
| hp_hsa-mir-124-2_x_st  | 0.002  | 8.60E-01 | 0.982 | 5.55  | 5.55  | 5.55  | 0.069 |
| hsa-miR-4282_st        | 0.002  | 8.61E-01 | 0.982 | 5.30  | 5.30  | 5.30  | 0.066 |
| hp_hsa-mir-626_st      | 0.002  | 8.62E-01 | 0.982 | 5.34  | 5.34  | 5.34  | 0.054 |
| hsa-miR-552_st         | -0.022 | 8.62E-01 | 0.982 | 6.04  | 6.07  | 6.05  | 0.619 |
| hsa-miR-3197_st        | -0.014 | 8.62E-01 | 0.982 | 8.33  | 8.35  | 8.34  | 0.396 |
| hsa-miR-33a_st         | 0.002  | 8.63E-01 | 0.982 | 5.27  | 5.27  | 5.27  | 0.049 |
| hp_hsa-mir-375_st      | -0.011 | 8.63E-01 | 0.982 | 6.33  | 6.34  | 6.34  | 0.322 |
| hsa-miR-579_st         | 0.002  | 8.63E-01 | 0.982 | 5.38  | 5.37  | 5.38  | 0.060 |
| hsa-miR-600_st         | 0.002  | 8.64E-01 | 0.982 | 5.38  | 5.38  | 5.38  | 0.061 |
| hsa-miR-1236_st        | -0.002 | 8.64E-01 | 0.982 | 5.37  | 5.37  | 5.37  | 0.069 |
| hsa-miR-548v_st        | -0.002 | 8.65E-01 | 0.982 | 5.30  | 5.30  | 5.30  | 0.052 |
| hsa-miR-299-3p_st      | 0.004  | 8.66E-01 | 0.982 | 5.64  | 5.64  | 5.64  | 0.104 |
| hsa-miR-548j_st        | 0.002  | 8.67E-01 | 0.982 | 5.34  | 5.33  | 5.34  | 0.047 |
| hsa-miR-631_st         | -0.002 | 8.67E-01 | 0.982 | 5.42  | 5.42  | 5.42  | 0.064 |
| hsa-miR-374b_st        | 0.004  | 8.67E-01 | 0.982 | 5.45  | 5.45  | 5.45  | 0.112 |
| hp_hsa-mir-99a_st      | -0.003 | 8.68E-01 | 0.982 | 5.46  | 5.46  | 5.46  | 0.080 |
| hsa-miR-921_st         | -0.004 | 8.69E-01 | 0.982 | 5.66  | 5.66  | 5.66  | 0.133 |
| hp_hsa-mir-2115_st     | -0.002 | 8.69E-01 | 0.982 | 5.37  | 5.37  | 5.37  | 0.056 |
| hsa-miR-452-star_st    | 0.002  | 8.69E-01 | 0.982 | 5.32  | 5.32  | 5.32  | 0.057 |
| hsa-miR-3139_st        | -0.002 | 8.69E-01 | 0.982 | 5.39  | 5.40  | 5.40  | 0.055 |
| hsa-miR-711_st         | -0.005 | 8.69E-01 | 0.982 | 5.74  | 5.74  | 5.74  | 0.156 |
| hsa-miR-616-star_st    | -0.002 | 8.69E-01 | 0.982 | 5.40  | 5.40  | 5.40  | 0.060 |
| hp_hsa-mir-586_st      | 0.002  | 8.70E-01 | 0.982 | 5.42  | 5.42  | 5.42  | 0.058 |
| hp_hsa-mir-548c_x_st   | 0.003  | 8.70E-01 | 0.982 | 5.42  | 5.42  | 5.42  | 0.101 |
| hsa-miR-374a_st        | -0.002 | 8.70E-01 | 0.982 | 5.38  | 5.38  | 5.38  | 0.058 |
| hp_hsa-mir-941-4_s_st  | 0.006  | 8.71E-01 | 0.982 | 6.33  | 6.32  | 6.33  | 0.191 |

|                        |        |          |       |       |       |       |       |
|------------------------|--------|----------|-------|-------|-------|-------|-------|
| hsa-miR-1260b_st       | -0.021 | 8.71E-01 | 0.982 | 8.86  | 8.88  | 8.87  | 0.649 |
| hp_hsa-mir-34c_st      | -0.002 | 8.72E-01 | 0.982 | 5.49  | 5.49  | 5.49  | 0.061 |
| hp_hsa-mir-1299_st     | 0.002  | 8.72E-01 | 0.982 | 5.45  | 5.45  | 5.45  | 0.056 |
| hsa-miR-1273c_st       | -0.003 | 8.74E-01 | 0.982 | 5.60  | 5.60  | 5.60  | 0.095 |
| hp_hsa-mir-323b_x_st   | -0.002 | 8.74E-01 | 0.982 | 5.49  | 5.50  | 5.50  | 0.057 |
| hp_hsa-mir-1910_st     | -0.005 | 8.74E-01 | 0.982 | 6.07  | 6.07  | 6.07  | 0.169 |
| hp_hsa-mir-30d_st      | 0.004  | 8.74E-01 | 0.982 | 6.04  | 6.04  | 6.04  | 0.108 |
| hsa-miR-193a-3p_st     | 0.009  | 8.74E-01 | 0.982 | 5.98  | 5.97  | 5.98  | 0.289 |
| hp_hsa-mir-610_st      | -0.002 | 8.75E-01 | 0.982 | 5.36  | 5.37  | 5.36  | 0.055 |
| hsa-miR-1285_st        | -0.005 | 8.76E-01 | 0.982 | 6.02  | 6.02  | 6.02  | 0.153 |
| hsa-miR-3121_st        | 0.003  | 8.77E-01 | 0.982 | 5.61  | 5.61  | 5.61  | 0.101 |
| hp_hsa-mir-615_st      | 0.003  | 8.77E-01 | 0.982 | 5.67  | 5.67  | 5.67  | 0.089 |
| hsa-miR-136-star_st    | -0.002 | 8.78E-01 | 0.982 | 5.30  | 5.30  | 5.30  | 0.062 |
| hp_hsa-mir-625_st      | 0.002  | 8.78E-01 | 0.982 | 5.44  | 5.44  | 5.44  | 0.060 |
| hp_hsa-mir-519a-1_x_st | -0.002 | 8.78E-01 | 0.982 | 5.36  | 5.36  | 5.36  | 0.053 |
| hsa-miR-589_st         | 0.002  | 8.78E-01 | 0.982 | 5.33  | 5.33  | 5.33  | 0.055 |
| hp_hsa-mir-181a-2_st   | 0.002  | 8.79E-01 | 0.982 | 5.45  | 5.45  | 5.45  | 0.069 |
| hp_hsa-mir-1284_st     | 0.002  | 8.80E-01 | 0.982 | 5.46  | 5.45  | 5.45  | 0.056 |
| hp_hsa-let-7a-1_st     | 0.002  | 8.81E-01 | 0.982 | 5.57  | 5.57  | 5.57  | 0.078 |
| hsa-miR-324-3p_st      | 0.009  | 8.81E-01 | 0.982 | 7.03  | 7.02  | 7.03  | 0.302 |
| hsa-miR-361-5p_st      | 0.014  | 8.81E-01 | 0.982 | 10.04 | 10.03 | 10.03 | 0.474 |
| hsa-miR-3137_st        | -0.007 | 8.81E-01 | 0.982 | 5.80  | 5.81  | 5.81  | 0.219 |
| hp_hsa-mir-10b_st      | -0.002 | 8.81E-01 | 0.982 | 5.38  | 5.39  | 5.38  | 0.056 |
| hsa-miR-548d-5p_st     | -0.002 | 8.82E-01 | 0.982 | 5.45  | 5.45  | 5.45  | 0.065 |
| hsa-miR-640_st         | -0.003 | 8.82E-01 | 0.982 | 5.63  | 5.63  | 5.63  | 0.099 |
| hsa-miR-520d-5p_st     | -0.002 | 8.83E-01 | 0.982 | 5.41  | 5.41  | 5.41  | 0.071 |
| hp_hsa-mir-1277_st     | 0.002  | 8.83E-01 | 0.982 | 5.34  | 5.34  | 5.34  | 0.051 |
| hp_hsa-mir-1258_x_st   | -0.002 | 8.84E-01 | 0.982 | 5.39  | 5.39  | 5.39  | 0.055 |
| hsa-miR-3135_st        | 0.002  | 8.84E-01 | 0.982 | 5.44  | 5.44  | 5.44  | 0.068 |
| hsa-miR-302a-star_st   | -0.002 | 8.84E-01 | 0.982 | 5.33  | 5.34  | 5.34  | 0.055 |
| hsa-miR-1275_st        | -0.014 | 8.86E-01 | 0.983 | 8.16  | 8.17  | 8.16  | 0.482 |
| hp_hsa-mir-519e_x_st   | 0.002  | 8.86E-01 | 0.983 | 5.37  | 5.37  | 5.37  | 0.056 |
| hp_hsa-let-7a-1_x_st   | 0.002  | 8.86E-01 | 0.983 | 5.49  | 5.49  | 5.49  | 0.069 |
| hp_hsa-mir-101-1_x_st  | -0.002 | 8.86E-01 | 0.983 | 5.31  | 5.31  | 5.31  | 0.054 |
| hsa-miR-137_st         | 0.001  | 8.87E-01 | 0.983 | 5.33  | 5.33  | 5.33  | 0.050 |
| hsa-miR-450b-5p_st     | 0.004  | 8.88E-01 | 0.983 | 5.63  | 5.63  | 5.63  | 0.144 |
| hp_hsa-mir-613_st      | 0.001  | 8.89E-01 | 0.983 | 5.34  | 5.34  | 5.34  | 0.043 |
| hp_hsa-mir-325_st      | 0.002  | 8.89E-01 | 0.983 | 5.29  | 5.29  | 5.29  | 0.056 |
| hp_hsa-mir-941-1_s_st  | -0.004 | 8.89E-01 | 0.983 | 6.09  | 6.09  | 6.09  | 0.147 |
| hp_hsa-mir-196a-2_st   | 0.002  | 8.90E-01 | 0.983 | 5.33  | 5.33  | 5.33  | 0.066 |
| hsa-miR-657_st         | 0.002  | 8.90E-01 | 0.983 | 5.33  | 5.32  | 5.33  | 0.056 |
| hsa-miR-200c-star_st   | -0.004 | 8.91E-01 | 0.983 | 5.51  | 5.51  | 5.51  | 0.153 |
| hp_hsa-mir-2110_st     | 0.003  | 8.91E-01 | 0.983 | 5.67  | 5.67  | 5.67  | 0.090 |
| hsa-miR-1323_st        | -0.006 | 8.92E-01 | 0.983 | 5.85  | 5.85  | 5.85  | 0.205 |
| hsa-miR-2277_st        | 0.008  | 8.92E-01 | 0.983 | 6.20  | 6.20  | 6.20  | 0.278 |
| hp_hsa-mir-548j_st     | -0.002 | 8.93E-01 | 0.983 | 5.53  | 5.53  | 5.53  | 0.086 |
| hp_hsa-mir-521-2_x_st  | -0.002 | 8.93E-01 | 0.983 | 5.39  | 5.40  | 5.39  | 0.060 |

|                        |        |          |       |       |       |       |       |
|------------------------|--------|----------|-------|-------|-------|-------|-------|
| hp_hsa-mir-1287_st     | 0.002  | 8.94E-01 | 0.983 | 5.37  | 5.37  | 5.37  | 0.057 |
| hsa-miR-4278_st        | -0.002 | 8.94E-01 | 0.983 | 5.35  | 5.35  | 5.35  | 0.069 |
| hsa-let-7b-star_st     | 0.004  | 8.94E-01 | 0.983 | 5.77  | 5.76  | 5.77  | 0.160 |
| hsa-miR-4271_st        | 0.011  | 8.94E-01 | 0.983 | 6.33  | 6.32  | 6.33  | 0.390 |
| hsa-miR-587_st         | 0.002  | 8.95E-01 | 0.983 | 5.50  | 5.49  | 5.50  | 0.068 |
| hsa-miR-183_st         | -0.013 | 8.95E-01 | 0.983 | 6.01  | 6.02  | 6.02  | 0.502 |
| hp_hsa-mir-503_st      | 0.004  | 8.98E-01 | 0.985 | 5.75  | 5.75  | 5.75  | 0.145 |
| hp_hsa-mir-541_st      | 0.002  | 8.98E-01 | 0.985 | 5.52  | 5.52  | 5.52  | 0.066 |
| hsa-miR-1911-star_st   | 0.002  | 8.99E-01 | 0.986 | 5.47  | 5.47  | 5.47  | 0.093 |
| hsa-miR-1245_st        | 0.002  | 8.99E-01 | 0.986 | 5.43  | 5.43  | 5.43  | 0.072 |
| hp_hsa-mir-3137_st     | -0.002 | 8.99E-01 | 0.986 | 5.48  | 5.48  | 5.48  | 0.078 |
| hp_hsa-mir-1293_st     | -0.002 | 9.01E-01 | 0.987 | 5.54  | 5.54  | 5.54  | 0.059 |
| hsa-miR-526b-star_st   | -0.001 | 9.01E-01 | 0.987 | 5.29  | 5.29  | 5.29  | 0.053 |
| hp_hsa-mir-411_st      | -0.001 | 9.03E-01 | 0.987 | 5.40  | 5.41  | 5.40  | 0.056 |
| hp_hsa-mir-1322_st     | 0.001  | 9.03E-01 | 0.987 | 5.33  | 5.33  | 5.33  | 0.050 |
| hsa-miR-302c-star_st   | -0.002 | 9.03E-01 | 0.987 | 5.53  | 5.53  | 5.53  | 0.070 |
| hsa-miR-1238_st        | 0.005  | 9.06E-01 | 0.988 | 5.96  | 5.96  | 5.96  | 0.222 |
| hp_hsa-mir-1-2_st      | 0.001  | 9.06E-01 | 0.988 | 5.46  | 5.46  | 5.46  | 0.051 |
| hsa-miR-1224-5p_st     | 0.012  | 9.06E-01 | 0.988 | 7.14  | 7.12  | 7.13  | 0.496 |
| hp_hsa-mir-135a-2_st   | 0.001  | 9.07E-01 | 0.988 | 5.35  | 5.35  | 5.35  | 0.052 |
| hsa-miR-3163_st        | 0.004  | 9.07E-01 | 0.988 | 5.78  | 5.78  | 5.78  | 0.170 |
| hp_hsa-mir-1255b-2_st  | 0.001  | 9.07E-01 | 0.988 | 5.33  | 5.33  | 5.33  | 0.048 |
| hsa-miR-665_st         | -0.006 | 9.07E-01 | 0.988 | 6.58  | 6.59  | 6.58  | 0.271 |
| hsa-miR-548a-3p_st     | 0.006  | 9.09E-01 | 0.988 | 6.05  | 6.05  | 6.05  | 0.277 |
| hsa-miR-1201_st        | 0.007  | 9.09E-01 | 0.988 | 5.74  | 5.73  | 5.74  | 0.288 |
| hsa-miR-218-2-star_st  | -0.001 | 9.09E-01 | 0.988 | 5.37  | 5.37  | 5.37  | 0.052 |
| hsa-miR-92a_st         | 0.015  | 9.10E-01 | 0.988 | 12.11 | 12.10 | 12.10 | 0.657 |
| hsa-miR-582-5p_st      | -0.001 | 9.10E-01 | 0.988 | 5.30  | 5.30  | 5.30  | 0.056 |
| hsa-miR-1227_st        | -0.002 | 9.10E-01 | 0.988 | 5.45  | 5.46  | 5.45  | 0.066 |
| hp_hsa-mir-151_x_st    | 0.004  | 9.12E-01 | 0.989 | 6.63  | 6.62  | 6.62  | 0.168 |
| hp_hsa-mir-129-1_x_st  | -0.002 | 9.12E-01 | 0.989 | 5.40  | 5.40  | 5.40  | 0.069 |
| hp_hsa-mir-135b_st     | 0.001  | 9.13E-01 | 0.989 | 5.36  | 5.36  | 5.36  | 0.059 |
| hp_hsa-mir-4252_st     | 0.001  | 9.13E-01 | 0.989 | 5.42  | 5.42  | 5.42  | 0.056 |
| hp_hsa-mir-1297_st     | 0.001  | 9.13E-01 | 0.989 | 5.43  | 5.43  | 5.43  | 0.061 |
| hp_hsa-mir-646_st      | -0.001 | 9.14E-01 | 0.989 | 5.40  | 5.40  | 5.40  | 0.056 |
| hp_hsa-mir-328_st      | -0.003 | 9.14E-01 | 0.989 | 5.95  | 5.95  | 5.95  | 0.129 |
| hsa-miR-4303_st        | -0.001 | 9.15E-01 | 0.989 | 5.41  | 5.41  | 5.41  | 0.066 |
| hsa-miR-1277_st        | 0.001  | 9.15E-01 | 0.989 | 5.35  | 5.35  | 5.35  | 0.050 |
| hp_hsa-mir-517c_x_st   | 0.001  | 9.15E-01 | 0.989 | 5.35  | 5.35  | 5.35  | 0.046 |
| hp_hsa-mir-548i-3_s_st | 0.002  | 9.16E-01 | 0.989 | 5.48  | 5.48  | 5.48  | 0.073 |
| hp_hsa-mir-515-2_s_st  | 0.001  | 9.16E-01 | 0.989 | 5.37  | 5.37  | 5.37  | 0.053 |
| hp_hsa-mir-2113_st     | -0.001 | 9.16E-01 | 0.989 | 5.39  | 5.39  | 5.39  | 0.064 |
| hp_hsa-mir-300_st      | -0.001 | 9.18E-01 | 0.989 | 5.39  | 5.39  | 5.39  | 0.060 |
| hsa-miR-1181_st        | -0.002 | 9.18E-01 | 0.989 | 5.52  | 5.52  | 5.52  | 0.096 |
| hp_hsa-mir-1260b_st    | 0.002  | 9.18E-01 | 0.989 | 6.12  | 6.12  | 6.12  | 0.103 |
| hsa-miR-554_st         | -0.003 | 9.18E-01 | 0.989 | 5.44  | 5.44  | 5.44  | 0.135 |
| hsa-miR-523-star_st    | -0.001 | 9.19E-01 | 0.989 | 5.27  | 5.27  | 5.27  | 0.051 |

|                        |        |          |       |       |       |       |       |
|------------------------|--------|----------|-------|-------|-------|-------|-------|
| hp_hsa-mir-660_st      | -0.002 | 9.19E-01 | 0.989 | 5.81  | 5.81  | 5.81  | 0.093 |
| hp_hsa-let-7f-1_st     | 0.001  | 9.21E-01 | 0.991 | 5.47  | 5.46  | 5.46  | 0.057 |
| hp_hsa-mir-548h-2_x_st | -0.002 | 9.22E-01 | 0.992 | 5.56  | 5.56  | 5.56  | 0.103 |
| hp_hsa-mir-101-1_st    | 0.001  | 9.24E-01 | 0.992 | 5.34  | 5.34  | 5.34  | 0.055 |
| hp_hsa-mir-4314_st     | 0.002  | 9.24E-01 | 0.992 | 5.59  | 5.58  | 5.59  | 0.085 |
| hp_hsa-mir-4326_st     | -0.002 | 9.25E-01 | 0.993 | 5.93  | 5.93  | 5.93  | 0.125 |
| hp_hsa-mir-668_st      | 0.002  | 9.26E-01 | 0.993 | 5.66  | 5.66  | 5.66  | 0.103 |
| hsa-miR-1471_st        | -0.002 | 9.26E-01 | 0.993 | 5.70  | 5.70  | 5.70  | 0.119 |
| hp_hsa-let-7g_st       | 0.002  | 9.27E-01 | 0.993 | 5.74  | 5.74  | 5.74  | 0.084 |
| hp_hsa-mir-580_x_st    | 0.001  | 9.27E-01 | 0.993 | 5.38  | 5.38  | 5.38  | 0.054 |
| hsa-miR-491-3p_st      | -0.001 | 9.27E-01 | 0.993 | 5.33  | 5.33  | 5.33  | 0.054 |
| hsa-miR-548b-3p_st     | -0.001 | 9.27E-01 | 0.993 | 5.31  | 5.31  | 5.31  | 0.053 |
| hp_hsa-mir-518b_x_st   | -0.001 | 9.29E-01 | 0.993 | 5.43  | 5.43  | 5.43  | 0.063 |
| hp_hsa-mir-101-2_x_st  | -0.001 | 9.29E-01 | 0.993 | 5.34  | 5.34  | 5.34  | 0.054 |
| hsa-miR-3186-5p_st     | -0.001 | 9.29E-01 | 0.993 | 5.43  | 5.44  | 5.43  | 0.073 |
| hsa-miR-222_st         | -0.011 | 9.30E-01 | 0.993 | 11.05 | 11.06 | 11.05 | 0.597 |
| hp_hsa-mir-4307_st     | 0.001  | 9.30E-01 | 0.993 | 5.32  | 5.32  | 5.32  | 0.057 |
| hp_hsa-mir-548i-2_x_st | -0.001 | 9.31E-01 | 0.994 | 5.34  | 5.34  | 5.34  | 0.057 |
| hp_hsa-mir-376a-2_st   | 0.001  | 9.32E-01 | 0.994 | 5.34  | 5.34  | 5.34  | 0.054 |
| hsa-miR-559_st         | -0.001 | 9.33E-01 | 0.994 | 5.36  | 5.36  | 5.36  | 0.064 |
| hp_hsa-mir-885_st      | -0.005 | 9.33E-01 | 0.994 | 6.43  | 6.43  | 6.43  | 0.286 |
| hsa-miR-517a_st        | 0.001  | 9.33E-01 | 0.994 | 5.30  | 5.30  | 5.30  | 0.057 |
| hsa-miR-3142_st        | -0.001 | 9.34E-01 | 0.994 | 5.29  | 5.30  | 5.29  | 0.060 |
| hp_hsa-mir-302c_x_st   | 0.001  | 9.34E-01 | 0.994 | 5.36  | 5.36  | 5.36  | 0.056 |
| hp_hsa-mir-548i-2_st   | -0.001 | 9.34E-01 | 0.994 | 5.40  | 5.41  | 5.40  | 0.071 |
| hsa-miR-3144-5p_st     | -0.001 | 9.35E-01 | 0.994 | 5.33  | 5.33  | 5.33  | 0.061 |
| hsa-miR-670_st         | 0.001  | 9.36E-01 | 0.994 | 5.33  | 5.33  | 5.33  | 0.070 |
| hsa-miR-4291_st        | 0.001  | 9.36E-01 | 0.994 | 5.42  | 5.42  | 5.42  | 0.069 |
| hsa-miR-367-star_st    | -0.001 | 9.37E-01 | 0.994 | 5.29  | 5.29  | 5.29  | 0.050 |
| hp_hsa-mir-4319_st     | 0.001  | 9.38E-01 | 0.994 | 5.37  | 5.37  | 5.37  | 0.049 |
| hsa-miR-595_st         | 0.001  | 9.38E-01 | 0.994 | 5.62  | 5.62  | 5.62  | 0.081 |
| hsa-miR-513c_st        | 0.001  | 9.38E-01 | 0.994 | 5.44  | 5.43  | 5.44  | 0.072 |
| hp_hsa-mir-487a_x_st   | -0.001 | 9.40E-01 | 0.995 | 5.47  | 5.47  | 5.47  | 0.067 |
| hp_hsa-mir-3169_st     | 0.001  | 9.41E-01 | 0.995 | 5.36  | 5.36  | 5.36  | 0.063 |
| hsa-miR-545-star_st    | 0.001  | 9.41E-01 | 0.995 | 5.30  | 5.30  | 5.30  | 0.050 |
| hp_hsa-mir-4308_st     | 0.001  | 9.42E-01 | 0.995 | 5.33  | 5.33  | 5.33  | 0.049 |
| hp_hsa-mir-659_x_st    | 0.001  | 9.42E-01 | 0.995 | 5.40  | 5.40  | 5.40  | 0.063 |
| hsa-miR-875-5p_st      | -0.001 | 9.43E-01 | 0.995 | 5.26  | 5.26  | 5.26  | 0.056 |
| hp_hsa-mir-190_x_st    | 0.001  | 9.43E-01 | 0.995 | 5.39  | 5.39  | 5.39  | 0.075 |
| hp_hsa-mir-205_st      | -0.001 | 9.44E-01 | 0.995 | 5.45  | 5.45  | 5.45  | 0.057 |
| hsa-miR-19a-star_st    | -0.001 | 9.45E-01 | 0.995 | 5.35  | 5.35  | 5.35  | 0.054 |
| hp_hsa-mir-24-2_st     | 0.001  | 9.45E-01 | 0.995 | 5.45  | 5.45  | 5.45  | 0.085 |
| hsa-miR-147_st         | 0.001  | 9.45E-01 | 0.995 | 5.32  | 5.32  | 5.32  | 0.054 |
| hp_hsa-mir-1262_st     | -0.001 | 9.46E-01 | 0.995 | 5.50  | 5.50  | 5.50  | 0.063 |
| hp_hsa-mir-493_st      | -0.001 | 9.46E-01 | 0.995 | 5.46  | 5.46  | 5.46  | 0.061 |
| hp_hsa-mir-892b_x_st   | 0.001  | 9.46E-01 | 0.995 | 5.38  | 5.38  | 5.38  | 0.053 |
| hsa-miR-103-as_st      | -0.001 | 9.47E-01 | 0.995 | 5.46  | 5.46  | 5.46  | 0.084 |



|                        |        |          |       |      |      |      |       |
|------------------------|--------|----------|-------|------|------|------|-------|
| hsa-miR-633_st         | -0.001 | 9.47E-01 | 0.995 | 5.31 | 5.31 | 5.31 | 0.055 |
| hp_hsa-mir-498_st      | -0.001 | 9.48E-01 | 0.995 | 5.41 | 5.41 | 5.41 | 0.059 |
| hsa-miR-501-5p_st      | -0.003 | 9.48E-01 | 0.995 | 6.00 | 6.01 | 6.00 | 0.251 |
| hsa-miR-3172_st        | -0.009 | 9.48E-01 | 0.995 | 8.07 | 8.08 | 8.07 | 0.649 |
| hp_hsa-mir-24-1_s_st   | -0.001 | 9.49E-01 | 0.995 | 5.33 | 5.33 | 5.33 | 0.057 |
| hsa-miR-219-2-3p_st    | 0.001  | 9.49E-01 | 0.995 | 5.42 | 5.42 | 5.42 | 0.051 |
| hsa-miR-767-3p_st      | 0.001  | 9.49E-01 | 0.995 | 5.36 | 5.36 | 5.36 | 0.061 |
| hp_hsa-mir-301a_x_st   | -0.001 | 9.50E-01 | 0.995 | 5.33 | 5.33 | 5.33 | 0.051 |
| hsa-miR-30b-star_st    | 0.003  | 9.50E-01 | 0.995 | 5.90 | 5.90 | 5.90 | 0.219 |
| hsa-miR-524-3p_st      | -0.001 | 9.50E-01 | 0.995 | 5.32 | 5.32 | 5.32 | 0.053 |
| hp_hsa-mir-3130-4_s_st | -0.001 | 9.51E-01 | 0.995 | 5.47 | 5.47 | 5.47 | 0.070 |
| hp_hsa-mir-575_st      | -0.001 | 9.51E-01 | 0.995 | 5.41 | 5.41 | 5.41 | 0.059 |
| hp_hsa-mir-569_st      | 0.001  | 9.52E-01 | 0.995 | 5.38 | 5.38 | 5.38 | 0.058 |
| hp_hsa-mir-876_st      | 0.001  | 9.53E-01 | 0.995 | 5.47 | 5.47 | 5.47 | 0.060 |
| hsa-miR-548l_st        | 0.001  | 9.54E-01 | 0.995 | 5.58 | 5.58 | 5.58 | 0.089 |
| hsa-miR-375_st         | -0.012 | 9.55E-01 | 0.995 | 8.70 | 8.71 | 8.71 | 1.088 |
| hp_hsa-mir-30d_x_st    | -0.001 | 9.55E-01 | 0.995 | 5.65 | 5.65 | 5.65 | 0.073 |
| hsa-miR-144_st         | -0.001 | 9.57E-01 | 0.995 | 5.33 | 5.33 | 5.33 | 0.063 |
| hp_hsa-mir-133b_st     | 0.001  | 9.57E-01 | 0.995 | 5.55 | 5.54 | 5.54 | 0.083 |
| hsa-miR-211_st         | -0.001 | 9.58E-01 | 0.995 | 5.43 | 5.43 | 5.43 | 0.075 |
| hsa-miR-514b-5p_st     | 0.002  | 9.58E-01 | 0.995 | 5.83 | 5.83 | 5.83 | 0.191 |
| hsa-miR-4266_st        | -0.001 | 9.59E-01 | 0.995 | 5.46 | 5.46 | 5.46 | 0.063 |
| hsa-miR-519c-3p_st     | 0.001  | 9.59E-01 | 0.995 | 5.28 | 5.28 | 5.28 | 0.058 |
| hp_hsa-mir-4290_st     | 0.001  | 9.59E-01 | 0.995 | 5.52 | 5.52 | 5.52 | 0.064 |
| hsa-miR-429_st         | -0.003 | 9.60E-01 | 0.995 | 5.74 | 5.75 | 5.75 | 0.282 |
| hsa-miR-573_st         | 0.000  | 9.60E-01 | 0.995 | 5.27 | 5.27 | 5.27 | 0.048 |
| hp_hsa-mir-1264_st     | -0.001 | 9.60E-01 | 0.995 | 5.40 | 5.40 | 5.40 | 0.054 |
| hp_hsa-mir-342_st      | 0.001  | 9.61E-01 | 0.995 | 5.93 | 5.93 | 5.93 | 0.120 |
| hsa-miR-1253_st        | 0.001  | 9.61E-01 | 0.995 | 5.36 | 5.36 | 5.36 | 0.061 |
| hp_hsa-mir-592_st      | 0.001  | 9.61E-01 | 0.995 | 5.35 | 5.35 | 5.35 | 0.054 |
| hsa-miR-941_st         | -0.003 | 9.61E-01 | 0.995 | 5.89 | 5.89 | 5.89 | 0.263 |
| hsa-miR-1233_st        | -0.001 | 9.62E-01 | 0.995 | 5.48 | 5.48 | 5.48 | 0.092 |
| hsa-miR-4322_st        | 0.004  | 9.62E-01 | 0.995 | 6.47 | 6.46 | 6.47 | 0.380 |
| hsa-miR-4252_st        | -0.001 | 9.63E-01 | 0.995 | 5.45 | 5.45 | 5.45 | 0.069 |
| hp_hsa-mir-499_st      | -0.001 | 9.63E-01 | 0.995 | 5.61 | 5.61 | 5.61 | 0.075 |
| hsa-miR-519d_st        | 0.001  | 9.63E-01 | 0.995 | 5.34 | 5.34 | 5.34 | 0.059 |
| hp_hsa-mir-548x_x_st   | -0.001 | 9.64E-01 | 0.995 | 5.53 | 5.53 | 5.53 | 0.095 |
| hsa-miR-298_st         | -0.001 | 9.64E-01 | 0.995 | 5.74 | 5.74 | 5.74 | 0.123 |
| hp_hsa-mir-331_st      | 0.001  | 9.65E-01 | 0.995 | 5.53 | 5.53 | 5.53 | 0.081 |
| hsa-miR-937_st         | -0.001 | 9.65E-01 | 0.995 | 5.45 | 5.45 | 5.45 | 0.067 |
| hsa-miR-1295_st        | 0.000  | 9.66E-01 | 0.995 | 5.36 | 5.36 | 5.36 | 0.055 |
| hsa-miR-518e_st        | 0.000  | 9.66E-01 | 0.995 | 5.27 | 5.27 | 5.27 | 0.054 |
| hsa-miR-888-star_st    | 0.000  | 9.66E-01 | 0.995 | 5.26 | 5.26 | 5.26 | 0.054 |
| hp_hsa-mir-320e_st     | 0.002  | 9.67E-01 | 0.995 | 6.17 | 6.17 | 6.17 | 0.184 |
| hp_hsa-mir-766_st      | -0.001 | 9.67E-01 | 0.995 | 5.46 | 5.46 | 5.46 | 0.076 |
| hsa-miR-122_st         | 0.001  | 9.67E-01 | 0.995 | 5.35 | 5.35 | 5.35 | 0.065 |
| hsa-miR-4304_st        | 0.001  | 9.67E-01 | 0.995 | 5.42 | 5.42 | 5.42 | 0.078 |

|                        |        |          |       |      |      |      |       |
|------------------------|--------|----------|-------|------|------|------|-------|
| hsa-miR-770-5p_st      | 0.000  | 9.67E-01 | 0.995 | 5.37 | 5.37 | 5.37 | 0.058 |
| hp_hsa-mir-2909_st     | 0.000  | 9.68E-01 | 0.995 | 5.32 | 5.32 | 5.32 | 0.058 |
| hsa-miR-520f_st        | -0.001 | 9.68E-01 | 0.995 | 5.43 | 5.43 | 5.43 | 0.066 |
| hsa-miR-508-3p_st      | 0.000  | 9.69E-01 | 0.996 | 5.28 | 5.28 | 5.28 | 0.054 |
| hsa-miR-3133_st        | 0.000  | 9.69E-01 | 0.996 | 5.36 | 5.36 | 5.36 | 0.063 |
| hsa-miR-556-5p_st      | 0.000  | 9.70E-01 | 0.996 | 5.38 | 5.38 | 5.38 | 0.062 |
| hsa-miR-569_st         | 0.000  | 9.70E-01 | 0.996 | 5.32 | 5.32 | 5.32 | 0.045 |
| hp_hsa-mir-518d_x_st   | 0.000  | 9.72E-01 | 0.996 | 5.37 | 5.37 | 5.37 | 0.053 |
| hp_hsa-mir-4254_st     | 0.000  | 9.72E-01 | 0.996 | 5.53 | 5.53 | 5.53 | 0.063 |
| hp_hsa-mir-4329_st     | 0.000  | 9.72E-01 | 0.996 | 5.40 | 5.40 | 5.40 | 0.050 |
| hsa-miR-338-3p_st      | 0.000  | 9.73E-01 | 0.996 | 5.29 | 5.29 | 5.29 | 0.053 |
| hp_hsa-mir-602_st      | -0.001 | 9.74E-01 | 0.997 | 5.77 | 5.77 | 5.77 | 0.129 |
| hp_hsa-mir-3176_st     | -0.001 | 9.74E-01 | 0.997 | 6.08 | 6.08 | 6.08 | 0.124 |
| hsa-miR-548x_st        | -0.001 | 9.75E-01 | 0.997 | 5.73 | 5.73 | 5.73 | 0.207 |
| hsa-miR-518d-3p_st     | 0.000  | 9.75E-01 | 0.997 | 5.29 | 5.29 | 5.29 | 0.056 |
| hp_hsa-mir-1972-1_s_st | 0.000  | 9.76E-01 | 0.997 | 5.41 | 5.41 | 5.41 | 0.074 |
| hsa-miR-506_st         | 0.000  | 9.77E-01 | 0.998 | 5.33 | 5.33 | 5.33 | 0.056 |
| hsa-miR-325_st         | 0.000  | 9.77E-01 | 0.998 | 5.31 | 5.31 | 5.31 | 0.046 |
| hsa-miR-4327_st        | -0.002 | 9.79E-01 | 0.998 | 6.10 | 6.10 | 6.10 | 0.319 |
| hsa-miR-4287_st        | 0.000  | 9.80E-01 | 0.998 | 5.43 | 5.43 | 5.43 | 0.076 |
| hp_hsa-mir-128-2_x_st  | 0.000  | 9.80E-01 | 0.998 | 5.57 | 5.57 | 5.57 | 0.066 |
| hp_hsa-mir-553_st      | 0.000  | 9.80E-01 | 0.998 | 5.31 | 5.31 | 5.31 | 0.051 |
| hp_hsa-mir-4301_st     | -0.001 | 9.80E-01 | 0.998 | 5.86 | 5.86 | 5.86 | 0.136 |
| hsa-miR-1224-3p_st     | 0.000  | 9.81E-01 | 0.998 | 5.48 | 5.48 | 5.48 | 0.082 |
| hp_hsa-mir-1302-7_st   | 0.000  | 9.81E-01 | 0.998 | 5.44 | 5.44 | 5.44 | 0.059 |
| hp_hsa-mir-621_st      | 0.000  | 9.81E-01 | 0.998 | 5.40 | 5.40 | 5.40 | 0.058 |
| hsa-miR-297_st         | 0.000  | 9.81E-01 | 0.998 | 5.34 | 5.34 | 5.34 | 0.079 |
| hsa-miR-3122_st        | 0.001  | 9.81E-01 | 0.998 | 5.59 | 5.59 | 5.59 | 0.111 |
| hsa-miR-187-star_st    | -0.001 | 9.83E-01 | 0.998 | 5.70 | 5.70 | 5.70 | 0.121 |
| hp_hsa-mir-320b-2_st   | -0.001 | 9.83E-01 | 0.998 | 6.42 | 6.42 | 6.42 | 0.176 |
| hsa-miR-550_st         | 0.001  | 9.83E-01 | 0.998 | 6.23 | 6.23 | 6.23 | 0.174 |
| hsa-miR-653_st         | 0.000  | 9.84E-01 | 0.998 | 5.27 | 5.27 | 5.27 | 0.054 |
| hsa-miR-4319_st        | 0.000  | 9.84E-01 | 0.998 | 5.40 | 5.40 | 5.40 | 0.069 |
| hp_hsa-mir-9-3_st      | 0.000  | 9.84E-01 | 0.998 | 5.64 | 5.64 | 5.64 | 0.095 |
| hsa-miR-140-3p_st      | -0.002 | 9.85E-01 | 0.998 | 9.59 | 9.59 | 9.59 | 0.451 |
| hsa-let-7a-2-star_st   | 0.000  | 9.86E-01 | 0.998 | 5.35 | 5.35 | 5.35 | 0.058 |
| hsa-miR-1289_st        | 0.000  | 9.86E-01 | 0.998 | 5.32 | 5.32 | 5.32 | 0.056 |
| hp_hsa-mir-3124_st     | 0.000  | 9.86E-01 | 0.998 | 5.46 | 5.46 | 5.46 | 0.072 |
| hsa-miR-512-3p_st      | 0.000  | 9.87E-01 | 0.998 | 5.40 | 5.40 | 5.40 | 0.059 |
| hsa-miR-1200_st        | 0.000  | 9.87E-01 | 0.998 | 5.33 | 5.33 | 5.33 | 0.053 |
| hp_hsa-mir-3118-1_x_st | 0.000  | 9.88E-01 | 0.998 | 5.30 | 5.30 | 5.30 | 0.045 |
| hp_hsa-mir-376a-2_x_st | 0.000  | 9.89E-01 | 0.998 | 5.40 | 5.40 | 5.40 | 0.059 |
| hp_hsa-mir-4259_st     | -0.001 | 9.89E-01 | 0.998 | 6.31 | 6.31 | 6.31 | 0.220 |
| hsa-miR-147b_st        | 0.000  | 9.89E-01 | 0.998 | 5.37 | 5.37 | 5.37 | 0.077 |
| hp_hsa-mir-1270-1_s_st | 0.000  | 9.91E-01 | 0.998 | 5.33 | 5.33 | 5.33 | 0.051 |
| hp_hsa-mir-181c_x_st   | 0.000  | 9.91E-01 | 0.998 | 5.58 | 5.58 | 5.58 | 0.076 |
| hp_hsa-mir-198_st      | 0.000  | 9.91E-01 | 0.998 | 5.64 | 5.64 | 5.64 | 0.108 |

|                      |        |          |       |      |      |      |       |
|----------------------|--------|----------|-------|------|------|------|-------|
| hsa-miR-548m_st      | 0.000  | 9.91E-01 | 0.998 | 5.28 | 5.28 | 5.28 | 0.056 |
| hp_hsa-mir-3127_st   | 0.000  | 9.92E-01 | 0.998 | 5.61 | 5.61 | 5.61 | 0.096 |
| hp_hsa-mir-429_st    | 0.000  | 9.92E-01 | 0.998 | 5.52 | 5.52 | 5.52 | 0.091 |
| hp_hsa-mir-708_st    | 0.000  | 9.92E-01 | 0.998 | 5.67 | 5.67 | 5.67 | 0.083 |
| hp_hsa-mir-10a_st    | 0.000  | 9.93E-01 | 0.998 | 5.38 | 5.38 | 5.38 | 0.064 |
| hsa-miR-551b_st      | 0.000  | 9.93E-01 | 0.998 | 5.32 | 5.32 | 5.32 | 0.063 |
| hsa-miR-1260_st      | -0.001 | 9.95E-01 | 0.999 | 6.84 | 6.84 | 6.84 | 0.415 |
| hsa-miR-337-3p_st    | 0.000  | 9.96E-01 | 1.000 | 5.39 | 5.39 | 5.39 | 0.063 |
| hsa-miR-518f-star_st | 0.000  | 9.97E-01 | 1.000 | 5.56 | 5.56 | 5.56 | 0.108 |
| hp_hsa-mir-520b_x_st | 0.000  | 9.98E-01 | 1.000 | 5.32 | 5.32 | 5.32 | 0.050 |
| hsa-miR-647_st       | 0.000  | 9.98E-01 | 1.000 | 5.45 | 5.45 | 5.45 | 0.074 |
| hp_hsa-mir-1289-2_st | 0.000  | 9.99E-01 | 1.000 | 5.57 | 5.57 | 5.57 | 0.093 |
| hsa-miR-200b_st      | 0.000  | 9.99E-01 | 1.000 | 9.26 | 9.26 | 9.26 | 0.702 |
| hp_hsa-mir-185_st    | 0.000  | 9.99E-01 | 1.000 | 5.74 | 5.74 | 5.74 | 0.100 |
| hsa-miR-519c-5p_st   | 0.000  | 1.00E+00 | 1.000 | 5.34 | 5.34 | 5.34 | 0.069 |
| hp_hsa-mir-302b_x_st | 0.000  | 1.00E+00 | 1.000 | 5.40 | 5.40 | 5.40 | 0.052 |
| hsa-miR-374a-star_st | 0.000  | 1.00E+00 | 1.000 | 5.40 | 5.40 | 5.40 | 0.065 |
